# Supplementary material for: Principal Component Analysis Based Feature Extraction Approach to Identify Circulating microRNA Biomarkers
Source: PLoS One. 2013 Jun 24;8(6):e66714. doi: 10.1371/journal.pone.0066714 (PMC3715582; doi:10.1371/journal.pone.0066714)
Supplement: Table S1 — Frequency of miRNAs selected by several feature selections. Frequency of miRNA selection within 90% sampling by feature selection based on PCA (100), -test (100), SAM (100), gsMMD_up (100), gsMMD_down (100), RFE (100), RFE ensemble (100), and UFF (100). Numbers in parentheses are the numbers of subsamplings. Cells filled with “100” indicate that the miRNA was always selected by feature extraction for discrimination between patients with the disease denoted at the top of column and healthy controls. (XLSX) [file pone.0066714.s004.xlsx]

## Sheet: PCA
	lung cancer	multiple sclerosis	other pancreatic tumors and diseases	pancreatitis	pancreatic cancer ductal	tumor of stomach	sarcoidosis	melanoma	wilms tumor	prostate cancer	acure myocard infarction	periodontitis	ovarian cancer	copd
hsa-miR-425	100	100	100	100	100	100	100	100	100	100	100	100	100	100
hsa-miR-15b	100	100	100	100	100	100	100	100	100	100	100	100	100	100
hsa-miR-185	100	100	100	100	100	100	100	100	100	100	100	100	100	100
hsa-miR-92a	100	100	100	100	100	100	100	100	100	100	100	100	100	100
hsa-miR-140-3p	100	100	100	100	100	100	100	100	100	100	100	100	100	100
hsa-miR-320a	100	100	100	100	100	100	100	100	100	100	100	100	100	100
hsa-miR-486-5p	100	100	100	100	100	100	100	100	100	100	100	100	100	100
hsa-miR-16	100	100	100	100	100	100	100	100	100	100	100	100	100	100
hsa-miR-191	100	13	88	100	100	100	100	99	100	100	100	72	97	100
hsa-miR-106b	0	100	90	97	0	95	7	1	100	98	100	100	81	100
hsa-miR-19b	100	87	22	3	100	5	8	100	0	2	0	28	22	0
hsa-miR-30d	0	0	0	0	0	0	85	0	0	0	0	0	0	0

## Sheet: t.test
	lung cancer	multiple sclerosis	other pancreatic tumors and diseases	pancreatitis	pancreatic cancer ductal	tumor of stomach	sarcoidosis	melanoma	wilms tumor	prostate cancer	acure myocard infarction	periodontitis	ovarian cancer	copd
hsa-miR-320d	0	0	100	100	100	100	94	0	1	0	0	0	13	0
hsa-miR-320a	0	0	100	100	100	96	0	0	0	0	0	0	93	0
hsa-miR-320b	0	0	100	100	100	100	0	0	0	0	0	0	12	0
hsa-miR-423-5p	4	0	46	92	99	4	0	0	0	0	0	0	99	48
hsa-miR-16	0	0	100	74	99	10	0	0	0	0	0	0	74	0
hsa-miR-720	0	0	100	99	100	1	0	0	0	0	0	0	17	0
hsa-miR-320c	0	0	12	100	100	100	0	0	1	0	0	0	0	0
hsa-miR-550*	0	0	100	100	100	0	0	0	0	0	0	0	0	0
hsa-miR-144	0	0	93	0	2	0	100	0	90	0	0	0	0	0
hsa-miR-891b	77	85	0	0	0	0	0	89	0	15	0	0	0	0
hsa-miR-103	85	0	0	0	0	0	100	0	53	0	0	0	0	0
hsa-miR-26a	0	0	0	0	1	0	15	0	0	0	99	0	0	100
hsa-miR-144*	1	0	0	0	0	0	40	0	64	100	0	0	0	0
hsa-miR-208b	1	14	0	0	0	0	0	0	83	1	99	0	0	0
hsa-miR-363	0	0	0	0	0	0	100	0	96	0	0	0	0	1
hsa-miR-1283	0	0	0	0	0	0	0	75	0	56	64	0	0	0
hsa-miR-20b	1	0	0	0	0	0	99	0	94	0	0	0	0	0
hsa-miR-1228	0	0	0	0	0	0	0	0	74	0	0	100	0	0
hsa-miR-324-3p	6	0	4	37	8	100	0	0	1	0	0	0	15	0
hsa-miR-192*	0	26	0	0	0	0	0	37	0	2	100	0	0	0
hsa-miR-342-3p	0	0	0	0	0	63	0	0	0	0	0	0	100	0
hsa-miR-361-5p	97	0	0	0	0	0	0	0	0	48	0	0	0	15
hsa-miR-181a	0	0	0	13	55	70	0	0	0	0	0	0	13	0
hsa-miR-150	0	0	0	0	0	0	0	0	1	0	0	51	98	0
hsa-miR-210	0	0	16	0	25	96	0	0	0	0	0	9	0	0
hsa-miR-182	0	0	0	0	0	0	0	0	0	0	0	0	50	90
hsa-miR-21*	100	0	0	0	0	0	0	24	0	14	0	0	0	0
hsa-miR-486-5p	98	0	0	0	0	0	0	0	0	0	0	0	0	39
hsa-miR-23b	2	0	0	0	17	0	0	0	0	0	0	0	0	100
hsa-miR-216a	0	0	0	0	0	0	0	70	0	47	0	0	0	1
hsa-miR-199a-5p	100	0	0	0	0	0	0	0	0	0	0	0	0	17
hsa-miR-1826	0	0	0	0	0	0	0	17	0	100	0	0	0	0
hsa-miR-455-3p	0	0	0	0	0	0	0	100	0	0	10	0	0	0
hsa-miR-374a	0	0	9	0	0	0	0	0	97	4	0	0	0	0
hsa-miR-146a	0	0	4	0	6	0	0	0	0	0	0	0	99	0
hsa-miR-140-3p	0	0	0	0	0	0	0	0	0	0	0	91	13	2
hsa-miR-17	0	0	0	0	0	0	100	0	5	0	0	0	0	0
hsa-miR-191	0	0	0	0	0	0	0	0	0	4	0	100	0	0
hsa-miR-1201	0	0	0	0	0	0	0	0	0	0	100	0	0	2
hsa-miR-519b-5p	0	0	0	0	0	0	0	4	0	96	1	0	0	0
hsa-miR-595	0	0	0	0	0	15	0	0	0	0	0	86	0	0
hsa-miR-1913	97	0	0	0	0	0	0	0	0	3	0	0	0	1
hsa-miR-106a	0	0	0	0	0	0	100	0	0	0	0	0	0	0
hsa-miR-339-5p	0	0	0	0	0	100	0	0	0	0	0	0	0	0
hsa-miR-744	0	0	0	0	0	0	0	0	0	0	0	100	0	0
hsa-miR-23a	0	0	0	0	0	0	0	0	0	0	0	0	0	99
hsa-miR-367	0	99	0	0	0	0	0	0	0	0	0	0	0	0
hsa-miR-1291	0	0	0	0	0	0	0	0	0	0	97	0	0	1
hsa-miR-487a	0	98	0	0	0	0	0	0	0	0	0	0	0	0
hsa-miR-151-5p	0	0	0	0	0	0	0	0	0	0	0	0	0	97
hsa-miR-129-3p	0	97	0	0	0	0	0	0	0	0	0	0	0	0
hsa-miR-497*	1	0	0	0	0	0	0	95	0	0	0	0	0	0
hsa-miR-655	0	0	0	0	0	0	0	0	0	0	0	0	95	0
hsa-miR-423-3p	95	0	0	0	0	0	0	0	0	0	0	0	0	0
hsa-miR-1286	7	0	0	0	0	0	0	88	0	0	0	0	0	0
hsa-miR-574-5p	0	0	0	1	1	0	0	0	0	0	0	92	0	0
hsa-miR-103-as	0	0	0	0	0	0	0	0	0	91	0	0	0	0
hsa-miR-30d	0	0	32	0	51	0	8	0	0	0	0	0	0	0
hsa-miR-625	0	0	0	0	0	90	0	0	0	0	0	0	0	0
hsa-miR-148a	1	0	2	50	17	0	0	0	0	17	0	0	0	0
hsa-miR-1256	0	87	0	0	0	0	0	0	0	0	0	0	0	0
hsa-miR-421	0	0	0	0	0	0	0	0	0	0	0	86	0	0
hsa-miR-20a	0	0	0	0	0	0	77	0	7	0	0	0	0	0
hsa-miR-556-5p	0	0	0	0	0	0	0	7	0	76	0	0	0	0
hsa-miR-10b*	0	0	0	0	0	0	0	0	0	0	83	0	0	0
hsa-miR-1200	0	82	0	0	0	0	0	0	0	0	0	0	0	0
hsa-miR-1251	0	0	0	0	0	0	0	81	0	0	0	0	0	0
hsa-miR-508-5p	4	0	0	0	0	0	0	5	0	0	71	0	0	0
hsa-let-7d	0	0	24	0	0	0	0	0	0	0	0	56	0	0
hsa-miR-197	0	0	6	71	0	1	0	0	0	0	0	0	0	1
hsa-miR-136*	0	73	0	0	0	0	0	0	0	0	5	0	0	0
hsa-miR-517*	0	0	0	0	0	0	0	70	0	6	0	0	0	1
hsa-miR-33a	0	0	0	0	0	0	0	0	0	0	77	0	0	0
hsa-miR-889	0	0	0	0	0	0	0	0	0	0	0	0	75	0
hsa-miR-548p	0	0	0	0	0	0	0	0	0	74	0	0	0	0
hsa-miR-200a	1	0	0	0	0	0	0	60	0	0	10	0	0	0
hsa-miR-374b	0	0	0	0	0	0	1	0	70	0	0	0	0	0
hsa-miR-608	0	0	0	45	0	0	0	0	3	0	0	22	0	0
hsa-miR-31*	0	0	0	0	0	0	0	2	0	60	7	0	0	0
hsa-miR-151-3p	0	0	4	0	0	5	58	0	2	0	0	0	0	0
hsa-miR-18b	0	0	0	0	0	0	0	0	67	0	0	0	0	0
hsa-miR-101	0	0	56	0	0	0	11	0	0	0	0	0	0	0
hsa-miR-1281	0	0	0	0	0	0	0	0	0	0	0	65	0	0
hsa-miR-138-2*	0	65	0	0	0	0	0	0	0	0	0	0	0	0
hsa-miR-205	0	0	0	0	0	0	0	0	1	0	0	0	0	64
hsa-miR-337-3p	0	0	0	0	0	0	0	0	0	0	0	0	2	63
hsa-miR-126	0	0	0	0	0	0	53	0	8	0	0	0	0	0
hsa-miR-488*	0	0	0	0	0	0	0	0	0	0	61	0	0	0
hsa-miR-628-5p	0	61	0	0	0	0	0	0	0	0	0	0	0	0
hsa-miR-93*	28	0	0	0	0	29	0	0	0	0	3	0	0	0
hsa-miR-26b	0	0	52	0	4	3	0	0	0	0	0	0	0	0
hsa-miR-107	7	0	13	1	0	0	37	0	0	0	0	0	0	0
hsa-miR-1272	0	2	0	0	0	0	0	54	0	0	0	0	0	0
hsa-miR-515-5p	0	0	0	0	0	0	0	0	0	45	10	0	0	0
hsa-miR-1206	14	40	0	0	0	0	0	0	0	0	0	0	0	0
hsa-miR-221*	0	2	0	0	0	0	0	5	0	40	0	0	0	0
hsa-miR-28-5p	0	0	0	0	0	0	0	0	0	0	0	0	0	42
hsa-miR-331-3p	42	0	0	0	0	0	0	0	0	0	0	0	0	0
hsa-miR-1208	0	0	0	0	0	0	0	41	0	0	0	0	0	0
hsa-miR-554	0	0	0	0	0	0	0	0	0	0	0	0	0	40
hsa-miR-500	29	0	0	0	0	0	0	0	0	0	0	0	8	0
hsa-miR-32	0	0	0	0	0	0	0	0	0	14	0	0	0	23
hsa-miR-875-3p	0	36	0	0	0	0	0	0	0	0	0	0	0	0
hsa-miR-625*	0	0	0	0	0	0	0	0	23	9	0	0	0	1
hsa-miR-425	0	0	0	0	0	4	0	0	0	0	0	27	0	0
hsa-miR-33b	0	0	0	0	0	0	0	10	0	21	0	0	0	0
hsa-miR-15b	0	0	0	0	0	0	4	0	0	0	0	0	26	0
hsa-miR-208a	0	0	0	0	0	0	0	0	0	0	0	0	0	30
hsa-miR-370	0	0	0	0	0	0	0	0	0	0	0	30	0	0
hsa-miR-27a	0	0	0	0	0	0	3	0	1	0	0	24	0	0
hsa-miR-155*	2	0	0	0	0	0	0	0	0	0	24	0	0	0
hsa-miR-92a	2	0	0	0	0	0	0	0	0	0	0	0	0	24
hsa-miR-590-5p	0	0	0	0	2	0	0	6	0	18	0	0	0	0
hsa-miR-663b	0	0	0	0	0	0	0	0	0	0	0	0	0	24
hsa-miR-384	0	0	0	0	0	0	0	0	0	0	0	22	0	0
hsa-miR-635	0	0	0	0	0	0	0	21	0	0	0	0	0	0
hsa-miR-422a	0	0	0	0	0	0	0	0	0	0	0	0	0	20
hsa-miR-647	2	18	0	0	0	0	0	0	0	0	0	0	0	0
hsa-miR-492	0	0	0	0	0	0	0	0	0	0	13	0	0	5
hsa-miR-324-5p	17	0	0	0	0	0	0	0	0	0	0	0	0	0
hsa-miR-486-3p	0	16	0	0	0	0	0	0	0	0	0	0	0	0
hsa-miR-1224-3p	0	0	0	0	0	0	0	0	0	0	0	0	15	0
hsa-miR-1259	0	0	0	0	0	0	0	0	0	0	0	0	15	0
hsa-let-7f-1*	0	0	0	0	0	0	0	0	0	0	0	0	15	0
hsa-miR-137	0	0	0	0	0	0	0	0	15	0	0	0	0	0
hsa-miR-495	0	0	0	0	0	0	0	0	0	0	0	0	14	0
hsa-miR-454*	0	0	0	0	0	0	0	0	0	0	0	0	14	0
hsa-miR-218-1*	0	0	0	0	0	0	0	0	0	0	14	0	0	0
hsa-miR-1183	9	5	0	0	0	0	0	0	0	0	0	0	0	0
hsa-miR-1268	0	0	12	0	1	0	0	0	0	0	0	0	0	0
hsa-miR-552	0	0	0	0	0	0	0	0	13	0	0	0	0	0
hsa-miR-454	0	0	0	0	0	0	0	0	6	0	0	0	6	0
hsa-miR-34a*	11	0	0	0	0	0	0	0	0	0	0	0	0	0
hsa-miR-1263	0	1	0	0	0	0	0	0	10	0	0	0	0	0
hsa-miR-199a-3p	0	9	0	0	0	0	0	0	2	0	0	0	0	0
hsa-miR-338-3p	0	0	0	0	0	0	0	0	0	11	0	0	0	0
hsa-miR-636	0	0	0	0	0	0	0	0	0	0	9	0	0	1
hsa-miR-10b	0	10	0	0	0	0	0	0	0	0	0	0	0	0
hsa-miR-149*	0	0	0	10	0	0	0	0	0	0	0	0	0	0
hsa-miR-561	0	0	0	0	0	0	0	0	9	0	0	0	0	0
hsa-miR-378	0	0	9	0	0	0	0	0	0	0	0	0	0	0
hsa-miR-16-2*	0	0	0	0	0	0	0	0	9	0	0	0	0	0
hsa-miR-491-3p	0	6	0	0	0	0	0	0	0	0	3	0	0	0
hsa-miR-484	0	0	2	0	6	0	0	0	0	0	0	0	0	0
hsa-miR-616*	3	0	0	0	0	0	0	0	4	0	1	0	0	0
hsa-miR-574-3p	0	0	0	0	0	0	0	0	0	0	0	0	2	6
hsa-miR-27b*	0	8	0	0	0	0	0	0	0	0	0	0	0	0
hsa-miR-100*	0	0	0	0	0	0	0	0	0	0	8	0	0	0
hsa-miR-21	0	0	0	0	0	0	0	0	8	0	0	0	0	0
hsa-miR-502-3p	8	0	0	0	0	0	0	0	0	0	0	0	0	0
hsa-miR-566	0	0	0	1	0	0	0	0	0	0	0	0	0	7
hsa-miR-1274b	8	0	0	0	0	0	0	0	0	0	0	0	0	0
hsa-miR-335	0	0	0	0	0	8	0	0	0	0	0	0	0	0
hsa-miR-130b	0	0	0	0	0	0	0	0	0	0	0	8	0	0
hsa-miR-29b	0	0	0	0	0	0	0	0	1	0	0	7	0	0
hsa-miR-193a-3p	0	0	0	0	0	0	0	0	8	0	0	0	0	0
hsa-miR-934	0	0	0	0	0	0	0	1	0	0	5	0	0	1
hsa-miR-518d-3p	7	0	0	0	0	0	0	0	0	0	0	0	0	0
hsa-miR-24-1*	0	0	0	0	0	0	0	0	0	0	5	0	0	2
hsa-miR-1234	0	4	0	0	0	0	0	0	1	0	0	0	0	2
hsa-miR-1271	0	0	0	0	0	0	0	0	1	0	0	6	0	0
hsa-miR-450b-5p	0	7	0	0	0	0	0	0	0	0	0	0	0	0
hsa-miR-522*	0	0	0	0	0	0	0	0	0	7	0	0	0	0
hsa-miR-519d	0	0	0	0	0	0	0	0	7	0	0	0	0	0
hsa-miR-19a*	0	0	0	0	0	0	0	0	7	0	0	0	0	0
hsa-miR-96	0	0	0	0	0	0	0	0	7	0	0	0	0	0
hsa-miR-9*	0	0	0	0	0	0	0	0	0	0	0	6	0	0
hsa-miR-1324	0	0	0	0	0	0	0	0	1	5	0	0	0	0
hsa-miR-526a	0	0	0	0	0	0	0	2	0	4	0	0	0	0
hsa-miR-181c	6	0	0	0	0	0	0	0	0	0	0	0	0	0
hsa-miR-641	1	5	0	0	0	0	0	0	0	0	0	0	0	0
hsa-miR-551a	0	6	0	0	0	0	0	0	0	0	0	0	0	0
hsa-miR-141*	6	0	0	0	0	0	0	0	0	0	0	0	0	0
hsa-miR-891a	0	6	0	0	0	0	0	0	0	0	0	0	0	0
hsa-miR-1297	0	6	0	0	0	0	0	0	0	0	0	0	0	0
hsa-miR-188-3p	0	0	0	0	0	0	0	0	0	0	6	0	0	0
hsa-miR-944	0	0	0	0	0	0	0	0	2	0	0	0	3	0
hsa-miR-28-3p	0	0	0	0	0	0	0	0	0	0	0	0	0	5
hsa-miR-543	0	0	0	0	0	0	0	0	0	0	0	0	5	0
hsa-miR-220c	0	0	0	0	0	0	0	5	0	0	0	0	0	0
hsa-miR-631	0	0	0	0	0	0	0	4	0	0	0	0	0	1
hsa-miR-19b	4	0	0	0	0	0	0	0	0	0	0	0	1	0
hsa-miR-545	0	0	0	0	0	0	0	4	0	1	0	0	0	0
hsa-miR-22	0	0	0	0	0	0	0	0	5	0	0	0	0	0
hsa-miR-532-5p	0	0	1	0	3	0	0	0	0	0	0	0	0	0
hsa-miR-20b*	0	0	0	0	0	0	0	0	0	0	4	0	0	0
hsa-miR-526b*	0	0	0	0	0	0	0	0	3	0	0	0	0	1
hsa-miR-649	0	0	0	0	0	0	0	0	0	0	0	0	0	4
hsa-miR-1226*	0	0	0	0	0	0	0	4	0	0	0	0	0	0
hsa-miR-1249	0	0	0	4	0	0	0	0	0	0	0	0	0	0
hsa-miR-383	0	4	0	0	0	0	0	0	0	0	0	0	0	0
hsa-miR-1470	2	0	0	0	0	0	0	0	1	0	0	0	1	0
hsa-miR-194	0	0	1	0	2	0	0	0	0	0	0	0	0	1
hsa-miR-516a-5p	0	0	0	0	0	0	0	3	0	1	0	0	0	0
hsa-miR-1912	0	0	0	0	0	0	0	3	0	0	1	0	0	0
hsa-miR-340	0	0	0	0	0	0	0	0	3	0	0	0	0	0
hsa-miR-330-3p	0	0	0	0	0	2	0	0	0	0	1	0	0	0
hsa-miR-217	0	0	0	0	0	0	0	0	0	3	0	0	0	0
hsa-miR-758	0	0	0	0	0	0	0	0	0	0	0	3	0	0
hsa-miR-1322	2	1	0	0	0	0	0	0	0	0	0	0	0	0
hsa-miR-215	0	0	0	0	0	0	0	0	3	0	0	0	0	0
hsa-miR-654-5p	0	0	0	0	0	0	0	0	0	0	3	0	0	0
hsa-miR-548o	2	0	0	0	0	0	0	1	0	0	0	0	0	0
hsa-miR-548a-3p	1	0	0	0	0	0	0	0	2	0	0	0	0	0
hsa-miR-183	0	0	0	0	0	0	0	0	0	0	0	0	0	3
hsa-miR-20a*	0	0	0	0	0	0	0	0	0	3	0	0	0	0
hsa-miR-146b-3p	3	0	0	0	0	0	0	0	0	0	0	0	0	0
hsa-miR-139-3p	0	3	0	0	0	0	0	0	0	0	0	0	0	0
hsa-miR-525-3p	0	0	0	0	0	0	0	0	2	0	0	0	0	0
hsa-miR-431	0	0	0	0	0	0	0	2	0	0	0	0	0	0
hsa-miR-200a*	0	0	0	0	0	0	0	0	0	0	0	0	0	2
hsa-miR-1908	0	0	0	2	0	0	0	0	0	0	0	0	0	0
hsa-miR-590-3p	0	0	0	0	0	0	0	0	2	0	0	0	0	0
hsa-miR-671-5p	0	2	0	0	0	0	0	0	0	0	0	0	0	0
hsa-miR-767-5p	0	0	0	0	0	0	0	0	1	0	1	0	0	0
hsa-miR-483-3p	0	0	0	0	0	0	0	0	2	0	0	0	0	0
hsa-miR-542-5p	0	0	0	0	0	0	0	2	0	0	0	0	0	0
hsa-miR-575	0	0	0	0	0	0	0	2	0	0	0	0	0	0
hsa-miR-588	0	0	0	0	0	0	0	2	0	0	0	0	0	0
hsa-miR-1295	0	2	0	0	0	0	0	0	0	0	0	0	0	0
hsa-miR-559	0	2	0	0	0	0	0	0	0	0	0	0	0	0
hsa-miR-129*	0	0	0	0	0	0	0	0	0	0	0	0	0	2
hsa-miR-1233	0	1	0	0	0	0	0	0	0	0	0	0	0	1
hsa-miR-1299	0	0	0	0	0	0	0	0	2	0	0	0	0	0
hsa-miR-149	0	0	0	0	0	0	0	0	2	0	0	0	0	0
hsa-miR-214	0	0	0	0	0	1	0	0	0	0	0	0	0	1
hsa-miR-591	0	0	0	0	0	0	0	0	0	0	0	0	0	2
hsa-miR-34b	0	0	0	0	0	0	0	0	0	0	0	0	2	0
hsa-miR-451	0	0	0	0	0	0	0	0	0	0	0	2	0	0
hsa-miR-1537	0	0	0	0	0	0	0	0	2	0	0	0	0	0
hsa-miR-200b	0	0	0	0	0	0	0	0	2	0	0	0	0	0
hsa-miR-125a-5p	2	0	0	0	0	0	0	0	0	0	0	0	0	0
hsa-miR-181c*	0	0	0	0	0	0	0	0	2	0	0	0	0	0
hsa-miR-512-5p	0	0	0	0	0	0	0	0	0	0	2	0	0	0
hsa-miR-520b	0	0	0	0	0	0	0	0	2	0	0	0	0	0
hsa-miR-580	0	2	0	0	0	0	0	0	0	0	0	0	0	0
hsa-miR-200c	0	2	0	0	0	0	0	0	0	0	0	0	0	0
hsa-miR-623	0	0	0	0	0	0	0	0	0	0	0	0	0	2
hsa-miR-302d*	0	0	0	0	0	0	0	0	0	0	0	0	2	0
hsa-miR-532-3p	0	0	1	0	0	0	0	0	0	0	0	0	1	0
hsa-miR-663	0	0	0	0	0	0	0	0	0	0	0	2	0	0
hsa-miR-30b*	0	0	0	0	0	0	0	0	1	0	0	0	0	0
hsa-miR-541	0	1	0	0	0	0	0	0	0	0	0	0	0	0
hsa-miR-125b	1	0	0	0	0	0	0	0	0	0	0	0	0	0
hsa-miR-548n	0	0	0	0	0	0	0	0	0	0	0	0	1	0
hsa-miR-888	0	0	0	0	0	0	0	0	0	0	0	0	1	0
hsa-miR-296-3p	0	0	0	0	0	0	0	0	1	0	0	0	0	0
hsa-miR-611	0	0	0	0	0	0	0	1	0	0	0	0	0	0
hsa-let-7b	0	1	0	0	0	0	0	0	0	0	0	0	0	0
hsa-miR-129-5p	0	0	0	0	0	0	0	0	1	0	0	0	0	0
hsa-miR-30c-1*	0	0	0	0	0	0	0	0	0	0	0	0	0	1
hsa-miR-621	0	0	0	0	0	0	0	0	0	1	0	0	0	0
hsa-miR-1243	0	1	0	0	0	0	0	0	0	0	0	0	0	0
hsa-miR-186*	0	0	0	0	0	0	0	1	0	0	0	0	0	0
hsa-miR-499-3p	0	0	0	0	0	0	0	0	0	0	0	1	0	0
hsa-miR-1307	0	0	0	0	0	0	0	0	1	0	0	0	0	0
hsa-miR-489	0	0	0	0	0	0	0	0	0	0	1	0	0	0
hsa-miR-375	0	0	0	0	0	0	0	0	1	0	0	0	0	0
hsa-miR-646	0	0	0	0	0	1	0	0	0	0	0	0	0	0
hsa-miR-92b	0	0	1	0	0	0	0	0	0	0	0	0	0	0
hsa-miR-142-5p	1	0	0	0	0	0	0	0	0	0	0	0	0	0
hsa-miR-1260	0	0	0	0	0	0	0	0	0	0	0	1	0	0
hsa-miR-15a	0	0	0	0	0	0	0	0	1	0	0	0	0	0
hsa-miR-583	0	1	0	0	0	0	0	0	0	0	0	0	0	0
hsa-miR-10a*	0	0	0	0	0	0	0	0	0	0	0	1	0	0
hsa-miR-377	0	0	0	0	0	0	0	1	0	0	0	0	0	0
hsa-miR-520d-5p	0	0	0	0	0	0	0	0	0	0	1	0	0	0
hsa-miR-617	0	0	0	0	0	0	0	0	1	0	0	0	0	0
hsa-miR-379*	0	1	0	0	0	0	0	0	0	0	0	0	0	0
hsa-miR-1308	0	0	0	0	0	0	0	0	0	0	0	0	0	1
hsa-miR-148b	0	0	0	0	0	0	0	0	1	0	0	0	0	0
hsa-miR-362-3p	0	0	0	0	0	0	0	0	1	0	0	0	0	0
hsa-miR-325	0	0	0	0	0	0	0	0	0	0	0	0	0	1
hsa-miR-183*	1	0	0	0	0	0	0	0	0	0	0	0	0	0
hsa-miR-24-2*	0	0	0	0	0	0	0	0	0	1	0	0	0	0
hsa-miR-26a-1*	0	0	0	0	0	0	0	0	1	0	0	0	0	0
hsa-miR-18a*	0	0	0	0	1	0	0	0	0	0	0	0	0	0
hsa-miR-326	0	0	0	0	0	0	0	0	0	0	0	0	0	1
hsa-miR-518e*	0	0	0	0	0	0	0	0	0	1	0	0	0	0
hsa-miR-142-3p	0	0	0	0	0	1	0	0	0	0	0	0	0	0
hsa-miR-296-5p	0	0	0	0	0	0	0	0	1	0	0	0	0	0
hsa-miR-138-1*	1	0	0	0	0	0	0	0	0	0	0	0	0	0
hsa-miR-1301	0	0	0	0	0	0	0	1	0	0	0	0	0	0
hsa-miR-135b	0	0	0	0	0	0	0	0	0	0	0	1	0	0
hsa-miR-122*	0	0	0	0	0	0	0	0	0	0	1	0	0	0
hsa-miR-10a	0	1	0	0	0	0	0	0	0	0	0	0	0	0
hsa-miR-652	0	0	0	0	0	0	0	0	0	0	0	0	0	1
hsa-miR-27b	0	0	0	0	0	0	0	0	0	1	0	0	0	0
hsa-miR-519e*	0	1	0	0	0	0	0	0	0	0	0	0	0	0
hsa-miR-1229	0	0	0	0	0	0	0	0	0	0	0	1	0	0

## Sheet: SAM
	lung cancer	multiple sclerosis	other pancreatic tumors and diseases	pancreatitis	pancreatic cancer ductal	tumor of stomach	sarcoidosis	melanoma	wilms tumor	prostate cancer	acure myocard infarction	periodontitis	ovarian cancer	copd
hsa-miR-320a	0	0	100	100	100	99	0	0	0	0	0	0	94	0
hsa-miR-320b	0	0	100	100	100	100	0	0	0	0	0	0	13	0
hsa-miR-320d	0	0	100	100	100	100	1	0	0	0	0	0	4	0
hsa-miR-16	0	0	100	87	98	7	0	0	0	0	0	0	94	0
hsa-miR-423-5p	7	0	36	86	100	2	0	0	0	0	0	0	93	47
hsa-miR-320c	0	0	22	100	100	100	0	0	0	0	0	0	0	0
hsa-miR-720	0	0	100	99	100	0	0	0	2	0	0	0	6	0
hsa-miR-550*	0	0	100	100	100	0	1	0	0	0	0	0	0	0
hsa-miR-342-3p	0	0	0	0	0	81	0	0	74	0	0	0	100	0
hsa-miR-144	0	0	87	0	3	0	1	0	99	0	0	0	0	0
hsa-miR-324-3p	8	0	12	34	10	100	0	0	0	0	0	0	9	0
hsa-miR-182	0	0	0	0	0	4	0	0	0	1	0	0	69	89
hsa-miR-361-5p	97	0	0	0	0	1	0	0	0	34	0	5	0	15
hsa-miR-210	0	0	21	0	40	87	0	0	0	0	0	3	1	0
hsa-miR-1228	0	0	0	0	0	0	0	0	41	0	0	100	0	0
hsa-miR-103	71	0	0	0	0	0	1	0	68	0	0	0	0	0
hsa-miR-181a	0	0	0	24	61	38	0	0	0	0	0	0	17	0
hsa-miR-150	0	0	0	0	0	0	0	0	0	0	0	43	93	0
hsa-miR-23b	8	0	0	0	25	0	0	0	0	0	0	0	0	99
hsa-miR-199a-5p	100	0	0	0	0	0	0	0	0	0	0	0	0	29
hsa-miR-144*	1	0	0	0	0	0	1	0	89	36	0	0	0	0
hsa-miR-26a	0	0	1	0	0	1	0	0	0	0	19	0	0	99
hsa-miR-374a	0	0	17	0	0	0	0	0	99	3	0	0	0	0
hsa-miR-140-3p	0	0	0	0	0	0	0	0	7	0	0	96	13	2
hsa-miR-146a	0	0	8	0	14	0	0	0	0	0	0	0	92	0
hsa-miR-486-5p	94	0	0	0	0	0	0	0	1	0	0	0	0	12
hsa-miR-21*	100	0	0	0	0	0	0	0	0	7	0	0	0	0
hsa-miR-191	0	0	0	0	0	0	0	0	0	5	0	100	0	0
hsa-miR-208b	0	0	0	0	0	0	0	0	85	0	19	0	0	0
hsa-miR-1913	98	0	0	0	0	0	0	0	0	2	0	0	0	2
hsa-miR-363	0	0	0	0	0	0	1	0	100	0	0	0	0	0
hsa-miR-744	0	0	0	0	0	0	0	0	0	0	0	100	0	0
hsa-miR-625	0	0	0	0	0	100	0	0	0	0	0	0	0	0
hsa-miR-151-5p	0	0	0	0	0	0	0	0	1	0	0	0	0	98
hsa-miR-339-5p	0	0	0	0	1	98	0	0	0	0	0	0	0	0
hsa-miR-20b	0	0	0	0	0	0	1	0	98	0	0	0	0	0
hsa-miR-423-3p	97	0	0	0	0	0	0	0	1	0	0	0	0	0
hsa-miR-23a	0	0	0	0	0	0	0	0	0	0	0	0	0	98
hsa-miR-595	0	0	0	8	0	21	0	0	0	0	0	68	0	0
hsa-miR-574-5p	0	0	0	12	13	0	0	0	0	0	0	70	0	0
hsa-miR-608	0	0	0	73	0	0	0	0	0	0	0	16	0	0
hsa-miR-26b	0	0	62	0	8	16	0	0	2	0	0	0	0	0
hsa-miR-891b	71	0	0	0	0	0	0	0	0	16	0	0	0	0
hsa-miR-889	0	0	0	0	0	0	0	0	6	0	0	0	81	0
hsa-miR-655	0	0	0	0	0	0	0	0	0	0	0	0	86	0
hsa-miR-421	0	0	0	0	0	0	0	0	0	0	0	84	0	0
hsa-miR-148a	1	0	1	50	26	0	0	0	0	5	0	0	0	0
hsa-miR-197	0	0	4	71	0	0	0	0	0	0	0	0	0	3
hsa-miR-93*	47	0	0	0	0	27	0	0	1	0	0	0	0	0
hsa-miR-205	0	0	0	0	0	0	0	0	0	0	0	0	0	74
hsa-miR-625*	0	0	0	0	0	0	0	0	63	10	0	0	0	1
hsa-miR-30d	0	0	24	2	45	0	1	0	0	0	0	0	0	0
hsa-miR-208a	0	0	0	0	0	0	0	0	0	0	0	0	0	65
hsa-miR-101	0	0	60	0	0	0	1	0	0	0	0	0	0	0
hsa-miR-337-3p	0	0	0	0	0	0	0	0	0	0	0	0	1	58
hsa-let-7d	0	0	21	0	0	0	0	0	0	0	0	35	0	0
hsa-miR-331-3p	54	0	0	0	0	0	0	0	0	0	0	0	0	0
hsa-miR-1281	0	0	0	0	0	0	0	0	0	0	0	53	0	0
hsa-miR-1283	0	0	0	0	0	0	0	0	0	27	19	0	0	0
hsa-miR-374b	0	0	0	0	0	0	0	0	46	0	0	0	0	0
hsa-miR-28-5p	0	0	0	0	0	0	0	0	0	0	0	0	0	44
hsa-miR-554	0	0	0	0	0	0	0	0	0	0	0	0	0	41
hsa-miR-370	0	0	0	0	0	0	0	0	0	0	0	41	0	0
hsa-miR-500	28	0	0	0	0	0	0	0	0	0	0	0	9	0
hsa-miR-1826	0	0	0	0	0	0	0	0	0	34	0	0	0	0
hsa-miR-27a	0	0	0	0	0	0	0	0	0	0	0	31	0	1
hsa-miR-384	0	0	0	0	0	0	0	0	0	0	0	31	0	0
hsa-miR-103-as	0	0	0	0	0	0	0	0	0	31	0	0	0	0
hsa-miR-425	0	0	0	0	0	3	0	0	5	0	0	20	0	0
hsa-miR-519b-5p	0	0	0	0	0	0	0	0	0	24	0	0	0	0
hsa-miR-422a	0	0	0	0	0	0	0	0	0	0	0	0	0	24
hsa-miR-15b	0	0	0	0	0	0	0	0	0	0	0	0	22	0
hsa-miR-663	0	0	0	0	0	0	0	0	0	0	0	22	0	0
hsa-miR-192*	0	0	0	0	0	0	0	0	0	2	19	0	0	0
hsa-miR-556-5p	0	0	0	0	0	0	0	0	0	20	0	0	0	0
hsa-miR-1291	0	0	0	0	0	0	0	0	0	0	19	0	0	1
hsa-miR-1268	0	0	9	0	11	0	0	0	0	0	0	0	0	0
hsa-miR-130b	0	0	0	0	0	0	0	0	0	0	0	20	0	0
hsa-miR-1259	0	0	0	0	0	0	0	0	0	0	0	0	19	0
hsa-miR-508-5p	2	0	0	0	0	0	0	0	0	0	17	0	0	0
hsa-miR-1201	0	0	0	0	0	0	0	0	0	0	19	0	0	0
hsa-miR-548p	0	0	0	0	0	0	0	0	0	19	0	0	0	0
hsa-miR-10b*	0	0	0	0	0	0	0	0	0	0	19	0	0	0
hsa-miR-216a	0	0	0	0	0	0	0	0	0	17	0	0	0	1
hsa-miR-33a	0	0	0	0	0	0	0	0	0	0	18	0	0	0
hsa-miR-324-5p	17	0	0	0	0	0	0	0	1	0	0	0	0	0
hsa-miR-31*	0	0	0	0	0	0	0	0	0	16	1	0	0	0
hsa-miR-454	0	0	0	0	0	0	0	0	10	0	0	0	7	0
hsa-miR-488*	0	0	0	0	0	0	0	0	0	0	17	0	0	0
hsa-miR-29b	0	0	0	0	0	0	0	0	0	0	0	17	0	0
hsa-miR-155*	1	0	0	0	0	0	0	0	0	0	14	0	0	1
hsa-miR-221*	0	0	0	0	0	0	0	0	0	16	0	0	0	0
hsa-miR-454*	0	0	0	0	0	0	0	0	0	0	0	0	16	0
hsa-miR-590-5p	0	0	0	0	3	0	0	0	0	13	0	0	0	0
hsa-miR-32	0	0	0	0	0	0	0	0	0	4	0	0	0	12
hsa-miR-96	0	0	0	0	0	0	0	0	16	0	0	0	0	0
hsa-miR-663b	0	0	0	0	0	0	0	0	0	0	0	0	0	15
hsa-miR-492	0	0	0	0	0	0	0	0	0	0	1	0	0	13
hsa-miR-92b*	0	0	0	0	0	0	0	0	0	0	0	13	0	0
hsa-miR-1206	13	0	0	0	0	0	0	0	0	0	0	0	0	0
hsa-miR-302d*	0	0	0	0	0	0	0	0	0	0	0	0	13	0
hsa-miR-532-5p	0	0	2	0	10	0	0	0	0	0	0	0	0	0
hsa-miR-24-1*	0	0	0	0	0	0	0	0	0	0	1	0	0	11
hsa-miR-107	1	0	8	2	0	0	1	0	0	0	0	0	0	0
hsa-miR-1224-3p	0	0	0	0	0	0	0	0	0	0	0	0	12	0
hsa-miR-515-5p	0	0	0	0	0	0	0	0	0	11	1	0	0	0
hsa-miR-1274b	12	0	0	0	0	0	0	0	0	0	0	0	0	0
hsa-miR-378	0	0	11	0	0	0	0	0	0	0	0	0	0	0
hsa-miR-149*	0	0	0	11	0	0	0	0	0	0	0	0	0	0
hsa-miR-574-3p	0	0	0	0	0	0	0	0	0	0	0	0	2	8
hsa-miR-20a	0	0	0	0	0	0	1	0	9	0	0	0	0	0
hsa-miR-136*	0	0	0	0	0	0	0	0	0	0	9	0	0	0
hsa-miR-9*	0	0	0	0	0	0	0	0	0	0	0	9	0	0
hsa-miR-18b	0	0	0	0	0	0	0	0	9	0	0	0	0	0
hsa-miR-126	0	0	0	0	0	0	1	0	7	0	0	0	0	0
hsa-miR-616*	6	0	0	0	0	0	0	0	1	0	1	0	0	0
hsa-miR-10a*	0	0	0	0	0	0	0	0	0	0	0	8	0	0
hsa-let-7f-1*	0	0	0	0	0	0	0	0	0	0	0	0	8	0
hsa-miR-1286	8	0	0	0	0	0	0	0	0	0	0	0	0	0
hsa-miR-193a-3p	0	0	0	0	0	0	0	0	8	0	0	0	0	0
hsa-miR-519e*	0	0	0	0	0	0	0	0	0	0	8	0	0	0
hsa-miR-20b*	0	0	0	0	0	0	0	0	0	0	7	0	0	0
hsa-miR-34a*	7	0	0	0	0	0	0	0	0	0	0	0	0	0
hsa-miR-944	0	0	0	0	0	0	0	0	0	0	0	0	7	0
hsa-miR-21	0	0	0	0	0	0	0	0	7	0	0	0	0	0
hsa-miR-17	0	0	0	0	0	0	1	0	6	0	0	0	0	0
hsa-miR-1908	0	0	0	6	0	0	0	0	0	0	0	0	0	0
hsa-miR-200a	1	0	0	0	0	0	0	0	0	1	4	0	0	0
hsa-miR-137	0	0	0	0	0	0	0	0	6	0	0	0	0	0
hsa-miR-128	0	0	0	0	0	0	0	0	6	0	0	0	0	0
hsa-miR-92a	4	0	0	0	0	0	0	0	0	0	0	0	0	2
hsa-miR-183	0	0	0	0	0	0	0	0	0	0	0	0	0	6
hsa-miR-33b	0	0	0	0	0	0	0	0	0	6	0	0	0	0
hsa-miR-649	0	0	0	0	0	0	0	0	0	0	0	0	0	5
hsa-miR-145*	0	0	0	0	0	0	0	0	0	0	5	0	0	0
hsa-miR-19b	5	0	0	0	0	0	0	0	0	0	0	0	0	0
hsa-miR-502-3p	5	0	0	0	0	0	0	0	0	0	0	0	0	0
hsa-miR-566	0	0	0	0	0	0	0	0	0	0	0	0	0	5
hsa-miR-1183	5	0	0	0	0	0	0	0	0	0	0	0	0	0
hsa-miR-16-2*	0	0	0	0	0	0	0	0	5	0	0	0	0	0
hsa-miR-561	0	0	0	0	0	0	0	0	4	0	0	0	0	0
hsa-miR-934	0	0	0	0	0	0	0	0	0	0	4	0	0	0
hsa-miR-484	0	0	0	0	4	0	0	0	0	0	0	0	0	0
hsa-miR-1271	0	0	0	0	0	0	0	0	0	0	0	4	0	0
hsa-miR-758	0	0	0	0	0	0	0	0	0	0	0	4	0	0
hsa-miR-129*	0	0	0	0	0	0	0	0	0	0	0	0	0	4
hsa-miR-1322	4	0	0	0	0	0	0	0	0	0	0	0	0	0
hsa-miR-125a-5p	4	0	0	0	0	0	0	0	0	0	0	0	0	0
hsa-miR-141*	4	0	0	0	0	0	0	0	0	0	0	0	0	0
hsa-miR-151-3p	0	0	2	0	0	1	1	0	0	0	0	0	0	0
hsa-miR-1297	0	0	0	0	0	0	0	0	0	0	4	0	0	0
hsa-miR-518d-3p	3	0	0	0	0	0	0	0	0	0	0	0	0	0
hsa-miR-622	0	0	0	0	0	0	0	0	0	0	0	3	0	0
hsa-miR-330-3p	0	0	0	0	0	3	0	0	0	0	0	0	0	0
hsa-miR-200a*	0	0	0	0	0	0	0	0	0	0	0	0	1	2
hsa-miR-28-3p	0	0	0	1	0	0	0	0	0	0	0	0	0	2
hsa-miR-1249	0	0	0	3	0	0	0	0	0	0	0	0	0	0
hsa-miR-182*	0	0	0	0	0	0	0	0	0	0	1	0	0	2
hsa-miR-495	0	0	0	0	0	0	0	0	0	0	0	0	3	0
hsa-miR-181c	1	0	0	0	0	0	0	0	0	0	0	0	2	0
hsa-miR-548o	2	0	0	0	0	0	0	0	0	0	1	0	0	0
hsa-miR-218-1*	0	0	0	0	0	0	0	0	0	0	3	0	0	0
hsa-miR-335	0	0	0	0	0	3	0	0	0	0	0	0	0	0
hsa-miR-338-3p	0	0	0	0	0	0	0	0	0	3	0	0	0	0
hsa-miR-532-3p	0	0	0	0	0	1	0	0	0	0	1	0	1	0
hsa-miR-340	0	0	0	0	0	0	0	0	2	0	0	0	0	0
hsa-miR-636	0	0	0	0	0	0	0	0	0	0	1	0	0	1
hsa-miR-129-3p	1	0	0	0	0	0	0	0	0	0	0	0	0	1
hsa-miR-1324	0	0	0	0	0	0	0	0	1	1	0	0	0	0
hsa-miR-1470	1	0	0	0	0	0	0	0	1	0	0	0	0	0
hsa-miR-194	0	0	0	1	1	0	0	0	0	0	0	0	0	0
hsa-miR-1233	0	0	0	0	0	0	0	0	0	0	0	0	0	2
hsa-miR-517*	0	0	0	0	0	0	0	0	0	2	0	0	0	0
hsa-miR-591	0	0	0	0	0	0	0	0	0	0	0	0	0	2
hsa-miR-34b	0	0	0	0	0	0	0	0	0	0	0	0	2	0
hsa-miR-518b	0	0	0	0	0	0	0	0	0	0	0	0	0	2
hsa-miR-325	0	0	0	0	0	0	0	0	0	0	0	0	0	2
hsa-miR-659	0	0	0	0	0	2	0	0	0	0	0	0	0	0
hsa-miR-326	0	0	0	0	0	0	0	0	0	0	0	0	0	2
hsa-miR-519d	0	0	0	0	0	0	0	0	2	0	0	0	0	0
hsa-miR-1274a	0	0	2	0	0	0	0	0	0	0	0	0	0	0
hsa-miR-188-3p	0	0	0	0	0	0	0	0	0	0	2	0	0	0
hsa-miR-491-3p	0	0	0	0	0	0	0	0	0	0	2	0	0	0
hsa-miR-22	0	0	0	0	0	0	0	0	2	0	0	0	0	0
hsa-miR-122*	0	0	0	0	0	0	0	0	0	0	2	0	0	0
hsa-miR-106b	0	0	0	0	0	0	0	0	1	0	0	0	0	0
hsa-miR-29a*	0	0	0	0	0	0	0	0	0	0	0	0	0	1
hsa-miR-486-3p	1	0	0	0	0	0	0	0	0	0	0	0	0	0
hsa-miR-567	0	0	0	0	0	0	0	0	0	0	0	1	0	0
hsa-miR-367*	0	0	0	0	0	0	0	0	0	0	0	0	1	0
hsa-miR-548n	0	0	0	0	0	0	0	0	0	0	0	0	1	0
hsa-miR-106a	0	0	0	0	0	0	1	0	0	0	0	0	0	0
hsa-miR-497*	1	0	0	0	0	0	0	0	0	0	0	0	0	0
hsa-miR-455-3p	0	0	0	0	0	0	0	0	0	0	1	0	0	0
hsa-miR-543	0	0	0	0	0	0	0	0	0	0	0	0	1	0
hsa-miR-767-5p	0	0	0	0	0	0	0	0	0	1	0	0	0	0
hsa-miR-1263	0	0	0	0	0	0	0	0	0	0	0	0	0	1
hsa-miR-30c-1*	0	0	0	0	0	0	0	0	0	0	0	0	0	1
hsa-miR-217	0	0	0	0	0	0	0	0	0	1	0	0	0	0
hsa-miR-499-3p	0	0	0	0	0	0	0	0	0	0	0	1	0	0
hsa-miR-489	0	0	0	0	0	0	0	0	0	0	1	0	0	0
hsa-miR-1278	0	0	0	0	0	0	0	0	0	0	1	0	0	0
hsa-miR-548m	0	0	0	0	0	0	0	0	0	0	0	0	0	1
hsa-miR-18a	0	0	0	0	0	0	0	0	1	0	0	0	0	0
hsa-miR-142-5p	0	0	0	0	0	0	0	0	1	0	0	0	0	0
hsa-miR-188-5p	0	0	0	0	0	0	0	0	0	0	0	0	0	1
hsa-miR-1260	0	0	0	0	0	0	0	0	0	0	0	1	0	0
hsa-miR-15a	0	0	0	0	0	0	0	0	1	0	0	0	0	0
hsa-miR-199a-3p	0	0	0	0	0	0	0	0	1	0	0	0	0	0
hsa-miR-96*	0	0	0	0	0	0	0	0	0	0	1	0	0	0
hsa-miR-520d-5p	0	0	0	0	0	0	0	0	0	0	1	0	0	0
hsa-miR-1308	0	0	0	0	0	0	0	0	0	0	0	0	0	1
hsa-miR-1915	0	0	0	1	0	0	0	0	0	0	0	0	0	0
hsa-miR-185	0	0	0	0	0	0	0	0	0	0	0	1	0	0
hsa-miR-1245	0	0	0	0	0	0	0	0	0	0	1	0	0	0
hsa-miR-451	0	0	0	0	0	0	0	0	0	0	0	1	0	0
hsa-miR-183*	1	0	0	0	0	0	0	0	0	0	0	0	0	0
hsa-miR-548k	0	0	0	0	0	0	0	0	0	0	0	0	0	1
hsa-miR-564	1	0	0	0	0	0	0	0	0	0	0	0	0	0
hsa-miR-20a*	0	0	0	0	0	0	0	0	0	1	0	0	0	0
hsa-miR-301a	0	0	0	0	0	0	0	0	0	1	0	0	0	0
hsa-miR-296-5p	0	0	0	0	0	0	0	0	1	0	0	0	0	0
hsa-miR-623	0	0	0	0	0	0	0	0	0	0	0	0	0	1
hsa-miR-193b*	0	0	0	0	0	0	0	0	0	0	0	0	0	1
hsa-miR-1288	0	0	0	0	0	0	0	0	0	0	0	0	0	1
hsa-miR-675	0	0	0	0	0	1	0	0	0	0	0	0	0	0
hsa-miR-302a*	0	0	0	0	0	0	0	0	1	0	0	0	0	0
hsa-miR-1225-3p	0	0	0	0	0	0	0	0	1	0	0	0	0	0
hsa-miR-627	0	0	0	0	0	0	0	0	0	0	1	0	0	0
hsa-miR-146b-3p	1	0	0	0	0	0	0	0	0	0	0	0	0	0
hsa-miR-523	1	0	0	0	0	0	0	0	0	0	0	0	0	0

## Sheet: gsMMD_up
	lung cancer	multiple sclerosis	other pancreatic tumors and diseases	pancreatitis	pancreatic cancer ductal	tumor of stomach	sarcoidosis	melanoma	wilms tumor	prostate cancer	acure myocard infarction	periodontitis	ovarian cancer	copd
hsa-miR-199a-5p	100	97	0	0	1	0	5	40	54	83	0	0	5	95
hsa-miR-574-5p	90	0	98	0	20	1	0	18	1	100	0	0	61	0
hsa-miR-361-5p	96	0	0	0	0	0	0	40	56	82	4	0	0	57
hsa-miR-183	0	0	0	0	0	16	0	0	0	9	79	24	59	98
hsa-miR-223	91	100	3	0	0	15	7	2	4	0	1	0	8	0
hsa-miR-125a-5p	99	0	0	0	0	2	8	1	4	94	10	6	2	1
hsa-miR-574-3p	39	0	0	0	0	0	4	0	82	89	0	1	0	7
hsa-miR-1908	0	100	0	0	0	0	8	0	23	0	0	84	6	0
hsa-miR-146b-5p	0	0	42	94	69	3	0	0	1	0	1	0	0	2
hsa-miR-423-3p	36	0	0	0	0	2	0	33	69	61	0	0	6	0
hsa-miR-1228*	0	73	1	0	0	7	0	0	3	0	0	54	55	0
hsa-miR-145	2	95	0	0	0	4	6	0	1	0	68	0	2	2
hsa-miR-181c*	0	0	28	60	92	0	0	0	0	0	0	0	0	0
hsa-miR-595	0	0	96	0	3	7	0	0	0	0	0	0	72	0
hsa-miR-105	0	0	87	0	90	0	0	0	0	0	0	0	0	0
hsa-miR-27a	4	0	0	0	0	5	0	1	4	0	88	0	3	68
hsa-miR-23b	35	1	0	0	0	2	0	40	2	5	79	0	3	0
hsa-miR-182	0	0	0	0	0	8	0	1	3	72	1	6	72	2
hsa-miR-545*	0	0	0	72	81	1	3	0	0	0	0	0	0	0
hsa-miR-423-5p	6	12	0	0	0	0	7	0	84	26	0	15	0	0
hsa-miR-1274b	5	1	0	0	0	11	0	38	4	0	76	1	1	0
hsa-miR-548e	0	0	0	70	53	0	0	0	0	0	0	0	0	12
hsa-let-7g	1	85	1	0	0	19	0	0	0	0	11	0	11	0
hsa-let-7c	0	100	0	0	0	7	0	0	1	1	11	0	2	0
hsa-miR-1226	0	0	88	18	0	0	9	0	1	0	0	0	0	0
hsa-miR-608	0	0	83	0	1	31	0	0	0	0	0	0	0	0
hsa-miR-197	6	0	0	0	0	0	1	3	16	84	2	1	0	1
hsa-miR-100	2	0	0	0	0	6	3	0	4	1	0	4	6	87
hsa-let-7b	1	99	0	0	0	4	0	0	1	3	4	0	0	0
hsa-let-7i	0	95	0	0	0	0	0	0	1	0	10	0	6	0
hsa-miR-28-5p	0	0	0	0	2	0	0	0	1	0	83	12	0	5
hsa-miR-422a	0	0	0	0	0	2	2	0	3	18	77	0	0	0
hsa-miR-151-3p	1	0	0	0	0	0	4	0	7	82	1	4	3	0
hsa-miR-101	0	8	0	0	0	7	0	0	0	0	85	0	0	0
hsa-miR-614	0	0	1	72	21	0	0	0	0	0	0	0	0	0
hsa-miR-25	65	0	0	0	0	5	19	0	0	0	0	0	4	0
hsa-miR-532-3p	0	0	0	0	0	0	5	0	5	83	0	0	0	0
hsa-miR-634	0	0	92	0	0	0	0	0	0	0	0	0	0	0
hsa-miR-155	0	0	0	0	0	1	0	1	0	0	0	0	0	90
hsa-miR-331-3p	44	10	0	0	0	0	14	0	5	13	2	1	3	0
hsa-miR-191*	0	0	0	0	91	0	0	0	0	0	0	0	0	0
hsa-miR-1269	0	0	0	0	90	0	0	0	0	0	0	0	0	0
hsa-miR-1274a	0	0	0	0	0	5	1	0	0	0	78	4	0	1
hsa-miR-149*	0	0	0	0	0	0	2	0	0	1	0	83	2	0
hsa-miR-199a-3p	0	0	87	0	0	0	0	0	0	0	0	0	0	0
hsa-miR-1204	0	0	0	0	86	0	0	0	0	0	0	0	0	0
hsa-miR-411*	0	0	2	72	4	0	0	0	0	0	0	0	0	7
hsa-miR-329	0	0	0	1	83	0	0	0	0	0	0	0	0	0
hsa-miR-32*	0	0	68	0	12	1	2	0	0	0	0	0	1	0
hsa-miR-371-3p	0	0	0	0	0	0	0	0	0	0	0	0	4	80
hsa-miR-27b	0	0	0	0	1	0	0	0	0	0	0	83	0	0
hsa-miR-766	0	0	0	0	0	0	0	0	80	0	0	0	1	0
hsa-miR-19b	72	0	0	0	0	2	0	1	2	0	1	0	2	0
hsa-miR-1183	0	0	0	0	0	6	0	0	0	0	0	0	72	0
hsa-miR-362-3p	57	0	0	0	0	6	0	10	1	0	0	1	1	1
hsa-miR-543	0	0	0	61	0	1	2	0	0	0	0	0	0	11
hsa-miR-23a*	0	0	0	0	0	36	5	33	0	0	0	0	0	0
hsa-miR-192	0	0	0	0	0	1	18	40	4	4	0	2	3	0
hsa-miR-520a-3p	0	0	0	8	0	1	32	31	0	0	0	0	0	0
hsa-miR-30e	0	39	0	0	0	0	6	3	2	1	16	1	3	0
hsa-miR-877*	0	0	0	0	0	22	0	47	0	1	0	0	0	0
hsa-miR-96	0	0	0	1	0	3	0	0	0	0	0	0	0	65
hsa-miR-384	0	0	0	68	0	0	0	0	0	0	0	0	0	0
hsa-miR-342-3p	0	0	0	0	0	0	1	2	49	3	0	10	3	0
hsa-miR-320b	0	0	0	0	0	0	5	0	0	0	0	62	0	0
hsa-miR-150	1	2	0	0	0	6	0	2	56	0	0	0	0	0
hsa-miR-339-3p	0	0	0	0	0	0	0	0	66	0	0	0	0	0
hsa-miR-661	0	0	0	0	0	0	0	0	0	0	0	0	9	57
hsa-miR-143	0	0	0	0	0	0	0	0	0	0	0	65	0	0
hsa-miR-1207-5p	2	11	0	0	0	0	0	41	4	1	0	2	1	2
hsa-miR-34c-5p	0	0	0	10	0	0	0	0	0	0	0	0	0	54
hsa-miR-103-as	63	0	0	0	0	0	0	0	0	0	0	0	0	0
hsa-miR-500	6	1	0	0	0	0	2	32	17	3	0	0	0	0
hsa-miR-1180	0	0	0	0	0	32	27	0	2	0	0	0	0	0
hsa-miR-101*	0	0	0	0	1	0	0	0	0	0	0	0	58	0
hsa-miR-328	0	0	0	47	0	0	9	0	1	0	0	0	0	0
hsa-miR-421	0	0	0	5	2	1	0	48	0	0	0	0	0	0
hsa-miR-320a	0	0	0	0	0	0	2	0	10	1	0	41	0	0
hsa-miR-181b	0	0	0	0	0	0	8	0	0	0	0	0	0	44
hsa-miR-26a	0	0	0	0	0	7	0	0	3	0	39	0	2	0
hsa-miR-708	0	0	50	0	0	0	0	0	1	0	0	0	0	0
hsa-miR-130b	0	0	0	0	0	0	0	0	1	0	0	50	0	0
hsa-let-7e	1	0	0	0	0	34	0	0	1	0	8	0	5	1
hsa-miR-376a*	0	0	0	0	0	0	20	28	0	0	0	0	0	0
hsa-miR-215	1	0	1	0	0	0	0	38	0	0	0	5	2	0
hsa-miR-551b*	0	0	0	0	47	0	0	0	0	0	0	0	0	0
hsa-miR-451	10	21	0	0	0	4	0	3	2	6	0	0	0	0
hsa-miR-483-5p	1	0	0	0	0	0	0	40	3	1	0	0	0	0
hsa-miR-93*	5	0	0	0	0	0	5	0	33	0	0	2	0	0
hsa-miR-16	0	0	0	0	0	1	0	0	2	0	4	0	38	0
hsa-miR-34b*	0	0	40	4	0	0	0	0	0	0	0	0	0	0
hsa-miR-501-5p	0	0	0	0	1	0	43	0	0	0	0	0	0	0
hsa-miR-1224-3p	0	0	22	0	0	7	0	14	0	0	0	0	0	0
hsa-miR-1272	0	0	0	0	0	0	0	0	0	0	0	43	0	0
hsa-miR-130a	1	11	0	0	0	7	0	0	2	1	11	2	6	0
hsa-miR-190b	0	0	0	0	0	0	4	37	0	0	0	0	0	0
hsa-miR-520f	0	0	0	0	1	17	2	20	0	0	0	0	0	0
hsa-miR-1281	2	0	7	0	1	14	0	6	0	5	1	0	0	4
hsa-miR-142-5p	0	0	0	0	0	18	1	0	0	1	7	2	11	0
hsa-miR-885-3p	0	0	0	0	0	0	0	0	1	0	0	5	34	0
hsa-let-7f	0	0	0	0	0	16	0	0	0	0	11	0	12	0
hsa-miR-29b-1*	0	0	0	0	0	2	3	33	0	0	0	0	0	0
hsa-miR-432*	0	0	1	37	0	0	0	0	0	0	0	0	0	0
hsa-miR-92a	12	3	0	0	0	18	2	1	1	0	0	0	0	1
hsa-miR-29a	1	0	0	0	0	0	4	6	7	2	3	8	3	2
hsa-miR-30a	0	0	0	0	0	0	2	31	1	0	0	2	0	0
hsa-miR-1286	0	0	0	0	0	0	0	0	0	0	0	0	36	0
hsa-miR-525-3p	0	0	0	0	35	0	0	0	0	0	0	0	0	0
hsa-miR-126	0	0	0	0	0	12	0	0	0	0	18	0	5	0
hsa-miR-337-5p	0	0	0	33	2	0	0	0	0	0	0	0	0	0
hsa-miR-24	0	0	0	0	0	0	0	28	4	0	3	0	0	0
hsa-miR-125b	4	0	0	0	0	6	9	1	1	6	0	1	4	2
hsa-miR-181a*	0	0	34	0	0	0	0	0	0	0	0	0	0	0
hsa-miR-28-3p	0	0	0	0	0	0	0	0	1	0	0	32	0	0
hsa-miR-140-3p	0	0	0	0	0	2	11	0	12	0	0	6	2	0
hsa-miR-320c	0	0	0	0	0	0	2	0	0	0	0	30	0	0
hsa-miR-629	0	0	0	0	0	31	1	0	0	0	0	0	0	0
hsa-miR-520d-3p	0	0	0	0	0	6	0	26	0	0	0	0	0	0
hsa-miR-26b	0	0	6	0	0	16	0	0	0	0	4	0	6	0
hsa-let-7a	0	2	0	0	0	14	0	0	1	0	2	0	12	0
hsa-miR-92b*	0	0	0	0	0	23	1	0	3	0	0	3	0	0
hsa-miR-583	0	0	0	30	0	0	0	0	0	0	0	0	0	0
hsa-miR-1268	0	0	0	0	0	16	2	4	1	0	0	0	6	0
hsa-miR-767-3p	0	0	0	0	0	0	0	0	0	0	0	0	0	28
hsa-miR-92b	0	0	0	0	0	16	1	0	7	0	0	0	4	0
hsa-miR-191	0	0	0	0	0	9	0	0	7	4	4	0	4	0
hsa-miR-652	0	18	0	0	0	0	0	0	0	1	9	0	0	0
hsa-miR-15a	0	0	0	0	0	8	0	0	0	0	0	1	18	0
hsa-miR-1294	0	0	0	0	0	9	0	17	0	0	0	0	0	0
hsa-miR-1915	0	2	0	0	0	12	0	0	7	1	0	0	0	4
hsa-miR-19a	1	3	0	0	0	4	0	0	1	0	8	0	9	0
hsa-miR-485-3p	0	0	0	0	0	0	24	0	2	0	0	0	0	0
hsa-miR-324-3p	3	0	0	0	0	0	1	0	11	4	0	6	0	0
hsa-miR-885-5p	0	0	0	0	4	0	21	0	0	0	0	0	0	0
hsa-miR-23a	1	0	0	0	0	3	0	0	5	0	14	0	2	0
hsa-miR-222	0	0	0	0	0	3	0	0	3	2	8	3	6	0
hsa-miR-1244	0	0	0	2	0	6	1	16	0	0	0	0	0	0
hsa-miR-650	0	0	0	22	0	0	0	0	0	0	0	2	0	0
hsa-miR-181a	0	2	0	0	0	0	9	1	0	5	2	1	4	0
hsa-miR-181a-2*	0	0	0	0	15	0	6	0	1	0	0	2	0	0
hsa-miR-425*	0	0	0	0	3	0	21	0	0	0	0	0	0	0
hsa-miR-1825	0	0	0	0	0	3	20	0	0	0	0	0	0	0
hsa-miR-339-5p	2	0	0	0	0	0	7	0	6	5	0	0	2	1
hsa-miR-425	0	0	0	0	0	0	18	0	0	0	2	0	2	0
hsa-miR-486-3p	0	0	2	11	0	4	0	0	0	0	1	0	4	0
hsa-miR-194*	0	0	0	16	4	0	2	0	0	0	0	0	0	0
hsa-miR-409-3p	0	0	0	0	0	1	21	0	0	0	0	0	0	0
hsa-let-7d	0	5	0	0	0	0	0	0	0	1	14	0	2	0
hsa-miR-544	0	0	0	22	0	0	0	0	0	0	0	0	0	0
hsa-miR-136*	0	0	0	0	0	0	0	0	0	0	0	0	0	21
hsa-miR-7	0	0	0	0	0	18	3	0	0	0	0	0	0	0
hsa-miR-142-3p	0	0	0	0	0	1	20	0	0	0	0	0	0	0
hsa-miR-297	0	0	0	0	0	0	0	0	0	0	0	0	21	0
hsa-miR-484	0	0	0	0	0	2	18	0	0	0	0	0	0	0
hsa-miR-107	0	0	0	0	0	9	0	0	0	0	0	11	0	0
hsa-miR-630	0	0	0	16	0	0	4	0	0	0	0	0	0	0
hsa-miR-1238	0	0	0	0	0	0	2	18	0	0	0	0	0	0
hsa-miR-22	0	0	0	0	0	4	1	0	1	0	4	2	8	0
hsa-miR-15b	0	0	0	0	0	8	0	5	1	0	0	1	4	0
hsa-miR-519d	0	0	0	0	0	0	0	0	0	0	0	0	0	19
hsa-miR-378	0	0	1	0	0	0	0	4	1	4	6	0	2	0
hsa-miR-1304	0	0	0	18	0	0	0	0	0	0	0	0	0	0
hsa-miR-575	0	0	0	0	0	0	0	0	1	0	0	16	1	0
hsa-let-7d*	2	0	0	0	0	2	1	0	9	1	0	0	3	0
hsa-miR-584	2	0	0	0	0	9	1	0	1	1	1	2	1	0
hsa-miR-195*	0	0	0	0	0	0	18	0	0	0	0	0	0	0
hsa-miR-374b	0	0	0	0	0	13	0	1	0	0	1	0	3	0
hsa-miR-324-5p	2	0	0	0	0	1	0	0	8	1	0	0	6	0
hsa-miR-532-5p	1	0	0	0	0	6	0	0	0	3	2	0	1	4
hsa-miR-1284	0	0	0	11	4	0	2	0	0	0	0	0	0	0
hsa-miR-639	0	0	0	0	17	0	0	0	0	0	0	0	0	0
hsa-miR-29b	0	0	0	0	0	1	7	0	0	0	0	5	3	1
hsa-miR-187*	0	0	8	0	0	0	0	0	0	0	0	0	8	0
hsa-miR-18b	0	3	0	0	0	0	0	2	3	1	0	0	6	1
hsa-miR-429	0	0	0	11	0	0	3	2	0	0	0	0	0	0
hsa-miR-375	0	0	0	0	0	0	16	0	0	0	0	0	0	0
hsa-miR-550*	1	0	0	0	0	0	4	0	2	3	0	3	3	0
hsa-miR-18a*	1	0	0	0	0	0	4	0	2	4	0	2	3	0
hsa-miR-301b	0	0	0	0	0	1	0	0	0	0	0	8	7	0
hsa-miR-224	0	0	0	0	0	0	16	0	0	0	0	0	0	0
hsa-miR-651	0	0	0	0	0	0	5	10	0	0	0	0	0	0
hsa-miR-338-5p	0	0	0	11	4	0	0	0	0	0	0	0	0	0
hsa-miR-1181	0	0	11	0	0	0	0	0	3	0	0	0	1	0
hsa-miR-363	0	0	0	0	0	8	0	1	0	0	2	0	4	0
hsa-miR-1236	0	0	0	0	0	14	1	0	0	0	0	0	0	0
hsa-miR-1260	0	0	0	0	0	1	10	0	0	0	2	0	2	0
hsa-miR-21	0	0	0	0	0	5	0	0	2	0	3	1	3	1
hsa-miR-362-5p	1	0	0	0	0	5	2	0	2	1	1	2	1	0
hsa-miR-135a*	0	0	0	0	0	14	1	0	0	0	0	0	0	0
hsa-miR-548j	0	0	0	0	0	1	7	6	0	0	0	0	0	0
hsa-miR-502-3p	11	0	0	0	0	1	0	0	0	0	0	2	0	0
hsa-miR-720	0	0	0	0	0	0	3	0	6	0	1	4	0	0
hsa-miR-663	0	1	0	0	0	0	0	0	0	0	0	13	0	0
hsa-miR-151-5p	0	0	0	0	0	0	0	0	6	1	1	2	3	0
hsa-miR-876-3p	0	0	0	0	0	0	13	0	0	0	0	0	0	0
hsa-miR-22*	0	0	0	0	0	1	12	0	0	0	0	0	0	0
hsa-miR-92a-2*	0	0	0	1	0	4	5	3	0	0	0	0	0	0
hsa-miR-498	0	0	0	4	0	1	1	0	0	0	0	0	0	7
hsa-miR-647	0	0	0	0	0	0	0	0	0	0	0	13	0	0
hsa-miR-374a	1	0	8	0	0	1	0	0	0	0	1	1	1	0
hsa-miR-491-5p	0	0	0	0	0	0	11	0	2	0	0	0	0	0
hsa-miR-516a-3p	0	0	0	0	0	0	0	0	0	0	0	0	0	13
hsa-miR-1182	0	0	0	0	0	11	0	1	0	0	0	0	0	0
hsa-miR-520g	0	0	0	0	0	0	0	0	0	0	0	0	0	12
hsa-miR-296-3p	0	0	1	0	0	11	0	0	0	0	0	0	0	0
hsa-miR-432	0	0	0	0	0	0	2	10	0	0	0	0	0	0
hsa-miR-26a-2*	0	0	0	0	0	4	4	4	0	0	0	0	0	0
hsa-miR-941	0	0	0	10	2	0	0	0	0	0	0	0	0	0
hsa-miR-30d	0	0	0	0	0	0	4	0	2	0	0	3	3	0
hsa-miR-204	0	0	0	0	0	6	2	4	0	0	0	0	0	0
hsa-miR-1469	0	0	0	0	0	2	0	0	0	0	0	10	0	0
hsa-miR-604	0	0	0	0	0	0	0	0	0	0	0	11	0	0
hsa-miR-346	0	0	11	0	0	0	0	0	0	0	0	0	0	0
hsa-miR-499-3p	0	0	0	7	4	0	0	0	0	0	0	0	0	0
hsa-miR-181c	0	0	0	0	0	0	3	0	2	1	1	2	0	2
hsa-miR-30e*	0	0	0	3	0	3	5	0	0	0	0	0	0	0
hsa-miR-320d	0	0	0	0	0	0	0	0	1	0	0	10	0	0
hsa-miR-98	0	0	0	0	0	9	0	2	0	0	0	0	0	0
hsa-miR-296-5p	0	0	7	0	0	4	0	0	0	0	0	0	0	0
hsa-miR-1280	0	0	0	0	0	3	7	0	0	0	0	0	1	0
hsa-miR-924	0	0	0	0	9	1	0	0	0	0	0	0	0	0
hsa-miR-183*	0	0	0	0	0	0	10	0	0	0	0	0	0	0
hsa-miR-638	0	0	0	0	0	0	0	0	5	1	0	3	1	0
hsa-miR-664	0	0	0	0	1	0	4	0	0	0	2	3	0	0
hsa-miR-7-1*	0	0	0	0	0	0	0	9	1	0	0	0	0	0
hsa-miR-154	0	0	0	0	0	7	2	1	0	0	0	0	0	0
hsa-miR-636	0	0	0	0	0	1	0	0	2	3	0	3	0	0
hsa-miR-93	0	0	0	0	0	0	0	0	0	0	6	0	3	0
hsa-miR-1273	0	0	0	0	0	0	0	0	4	0	0	2	1	2
hsa-miR-550	0	0	0	6	1	0	0	0	1	0	0	0	0	1
hsa-miR-99a	0	0	0	0	0	3	2	0	3	0	0	1	0	0
hsa-miR-1234	2	0	0	0	0	0	0	0	4	2	0	0	1	0
hsa-miR-450b-5p	0	0	0	5	4	0	0	0	0	0	0	0	0	0
hsa-miR-744	0	0	0	0	0	0	0	2	2	4	0	0	0	1
hsa-miR-512-3p	0	0	0	0	0	0	8	0	1	0	0	0	0	0
hsa-miR-618	0	0	0	0	0	0	8	1	0	0	0	0	0	0
hsa-miR-133a	0	0	0	8	0	1	0	0	0	0	0	0	0	0
hsa-miR-30b*	0	0	0	0	0	3	0	5	0	0	0	0	0	0
hsa-miR-210	1	0	0	0	0	0	0	0	4	2	1	0	0	0
hsa-miR-1226*	0	0	0	0	0	0	0	0	0	0	0	8	0	0
hsa-miR-765	0	0	0	0	0	8	0	0	0	0	0	0	0	0
hsa-miR-483-3p	0	0	0	0	0	0	8	0	0	0	0	0	0	0
hsa-miR-135a	0	0	0	0	0	6	2	0	0	0	0	0	0	0
hsa-miR-103	0	0	0	0	0	5	0	0	0	0	1	2	0	0
hsa-miR-186	0	0	0	0	0	2	0	0	0	0	0	0	1	5
hsa-miR-1179	0	0	0	0	8	0	0	0	0	0	0	0	0	0
hsa-miR-20b	0	0	0	0	0	0	0	0	0	0	1	0	7	0
hsa-miR-675	0	0	0	0	0	4	0	0	2	0	0	2	0	0
hsa-miR-556-3p	0	0	0	0	0	0	5	2	0	0	0	0	0	0
hsa-miR-1251	0	0	0	4	0	0	0	0	0	0	0	3	0	0
hsa-miR-143*	0	0	2	5	0	0	0	0	0	0	0	0	0	0
hsa-miR-18a	0	0	0	0	0	0	0	0	0	0	0	2	5	0
hsa-miR-220b	0	0	0	0	0	0	7	0	0	0	0	0	0	0
hsa-miR-1322	0	0	0	0	1	0	0	0	1	0	0	0	4	1
hsa-miR-597	0	0	0	1	6	0	0	0	0	0	0	0	0	0
hsa-miR-219-2-3p	0	0	0	0	0	6	1	0	0	0	0	0	0	0
hsa-miR-576-3p	0	0	0	7	0	0	0	0	0	0	0	0	0	0
hsa-miR-185	0	0	0	0	0	4	0	0	1	0	0	0	2	0
hsa-miR-548f	0	0	0	0	0	1	6	0	0	0	0	0	0	0
hsa-miR-564	0	0	0	0	0	0	0	0	1	0	0	5	1	0
hsa-miR-580	0	0	0	0	7	0	0	0	0	0	0	0	0	0
hsa-miR-10a	0	0	0	0	1	0	6	0	0	0	0	0	0	0
hsa-miR-586	0	0	0	0	0	0	0	0	0	0	0	0	0	7
hsa-miR-939	0	0	1	2	0	3	0	0	0	0	0	0	0	0
hsa-miR-323-3p	0	0	0	0	0	0	4	0	0	0	0	0	0	2
hsa-miR-431	0	0	0	0	0	0	0	0	0	0	0	4	2	0
hsa-miR-30c	0	0	0	0	0	0	4	0	0	0	0	0	2	0
hsa-miR-361-3p	0	0	0	0	0	0	0	0	2	0	0	2	2	0
hsa-miR-518a-5p	0	0	0	0	0	0	0	0	1	0	0	1	4	0
hsa-miR-124	0	0	0	0	0	0	0	0	0	0	0	6	0	0
hsa-miR-1250	0	0	0	0	0	4	2	0	0	0	0	0	0	0
hsa-miR-31	2	0	0	4	0	0	0	0	0	0	0	0	0	0
hsa-miR-29c	0	0	0	0	0	4	2	0	0	0	0	0	0	0
hsa-miR-1270	0	0	0	0	0	0	6	0	0	0	0	0	0	0
hsa-miR-1266	0	0	0	0	0	0	0	0	0	0	0	1	5	0
hsa-miR-590-5p	0	0	0	0	0	0	0	0	0	0	0	6	0	0
hsa-miR-30b	0	0	0	0	0	3	0	0	0	0	0	0	3	0
hsa-miR-578	0	0	0	0	0	3	3	0	0	0	0	0	0	0
hsa-miR-520a-5p	0	0	0	0	0	0	0	0	0	0	0	0	6	0
hsa-miR-548g	0	0	0	0	0	0	5	1	0	0	0	0	0	0
hsa-miR-382	0	0	0	0	0	2	4	0	0	0	0	0	0	0
hsa-miR-369-5p	0	0	0	1	0	0	4	0	0	0	0	0	0	0
hsa-miR-1228	0	0	0	0	0	2	0	1	0	1	1	0	0	0
hsa-miR-133b	0	0	0	0	0	1	4	0	0	0	0	0	0	0
hsa-miR-302b*	0	0	0	0	0	0	5	0	0	0	0	0	0	0
hsa-miR-193b	0	0	0	0	0	0	0	0	5	0	0	0	0	0
hsa-miR-186*	0	0	0	5	0	0	0	0	0	0	0	0	0	0
hsa-miR-1247	0	0	0	0	0	2	2	0	0	0	0	0	1	0
hsa-miR-509-3p	0	0	0	0	0	3	0	2	0	0	0	0	0	0
hsa-miR-501-3p	0	0	0	0	0	0	0	0	1	0	0	2	2	0
hsa-miR-193a-5p	0	0	0	0	0	4	1	0	0	0	0	0	0	0
hsa-miR-148b*	0	0	0	0	0	0	5	0	0	0	0	0	0	0
hsa-miR-453	0	0	0	0	0	3	0	2	0	0	0	0	0	0
hsa-miR-20a	0	0	0	0	0	2	0	0	0	0	0	1	2	0
hsa-miR-148a	0	0	0	0	0	0	0	0	2	0	0	2	1	0
hsa-miR-562	0	0	0	0	0	0	5	0	0	0	0	0	0	0
hsa-miR-582-5p	0	0	0	0	0	5	0	0	0	0	0	0	0	0
hsa-miR-644	0	0	0	0	0	0	0	5	0	0	0	0	0	0
hsa-miR-513a-3p	0	0	0	0	0	0	5	0	0	0	0	0	0	0
hsa-miR-424*	0	0	0	0	0	0	0	1	2	0	0	2	0	0
hsa-miR-660	0	0	0	0	0	0	0	0	1	0	0	0	4	0
hsa-miR-1471	0	0	0	0	0	0	0	0	2	0	0	2	1	0
hsa-miR-365	0	0	0	0	0	0	5	0	0	0	0	0	0	0
hsa-miR-625	0	0	0	0	0	4	0	0	1	0	0	0	0	0
hsa-miR-891a	0	0	0	0	0	0	0	0	0	0	0	0	5	0
hsa-miR-1285	0	0	0	0	0	0	0	0	2	0	0	3	0	0
hsa-miR-16-2*	0	0	0	0	0	3	1	0	0	0	0	0	1	0
hsa-miR-146a	0	0	0	0	0	0	2	0	0	0	0	3	0	0
hsa-miR-942	0	0	0	0	0	0	5	0	0	0	0	0	0	0
hsa-miR-29a*	0	0	0	0	0	2	0	2	0	0	0	0	0	0
hsa-miR-628-3p	0	0	0	0	0	2	0	0	0	0	0	1	1	0
hsa-miR-132	0	0	0	0	0	4	0	0	0	0	0	0	0	0
hsa-miR-1258	0	0	0	0	0	0	0	4	0	0	0	0	0	0
hsa-miR-383	0	0	2	1	0	0	0	0	0	0	0	0	1	0
hsa-miR-592	0	0	0	4	0	0	0	0	0	0	0	0	0	0
hsa-miR-378*	0	0	0	0	0	0	4	0	0	0	0	0	0	0
hsa-miR-1303	0	0	0	3	0	0	0	1	0	0	0	0	0	0
hsa-miR-302c	0	0	0	0	0	0	4	0	0	0	0	0	0	0
hsa-miR-96*	0	0	0	3	1	0	0	0	0	0	0	0	0	0
hsa-miR-376c	0	0	0	0	0	0	0	0	1	0	0	3	0	0
hsa-miR-9	0	0	0	2	0	0	1	1	0	0	0	0	0	0
hsa-miR-511	0	0	0	0	0	4	0	0	0	0	0	0	0	0
hsa-miR-1537	0	0	0	0	0	0	4	0	0	0	0	0	0	0
hsa-miR-1282	0	0	0	0	0	1	3	0	0	0	0	0	0	0
hsa-miR-624*	0	0	0	0	0	0	2	2	0	0	0	0	0	0
hsa-miR-613	0	0	0	0	0	0	0	4	0	0	0	0	0	0
hsa-miR-200c	0	0	0	0	4	0	0	0	0	0	0	0	0	0
hsa-miR-576-5p	0	0	0	0	0	2	2	0	0	0	0	0	0	0
hsa-miR-557	0	0	0	0	0	0	4	0	0	0	0	0	0	0
hsa-miR-516b*	0	0	0	0	0	0	4	0	0	0	0	0	0	0
hsa-miR-509-5p	0	0	0	0	0	0	0	0	0	0	0	4	0	0
hsa-miR-135b	0	0	0	0	0	2	2	0	0	0	0	0	0	0
hsa-miR-125b-2*	0	0	0	4	0	0	0	0	0	0	0	0	0	0
hsa-miR-933	0	0	0	0	0	0	0	0	2	0	0	0	2	0
hsa-miR-376a	0	0	0	0	0	1	0	0	0	0	0	0	3	0
hsa-miR-556-5p	0	0	0	0	0	0	0	0	1	0	0	2	0	0
hsa-miR-519b-5p	3	0	0	0	0	0	0	0	0	0	0	0	0	0
hsa-miR-377*	0	0	0	0	0	0	0	3	0	0	0	0	0	0
hsa-miR-1265	0	0	0	0	0	0	3	0	0	0	0	0	0	0
hsa-miR-502-5p	0	0	0	0	0	0	3	0	0	0	0	0	0	0
hsa-miR-1248	0	0	0	0	0	0	2	1	0	0	0	0	0	0
hsa-miR-106a	0	0	0	0	0	3	0	0	0	0	0	0	0	0
hsa-miR-505	0	0	0	0	0	0	2	1	0	0	0	0	0	0
hsa-miR-522	0	0	0	0	0	2	1	0	0	0	0	0	0	0
hsa-miR-642	0	0	0	0	0	0	1	2	0	0	0	0	0	0
hsa-miR-635	0	0	0	0	0	0	0	0	0	0	0	1	2	0
hsa-miR-548a-5p	0	0	0	0	0	0	3	0	0	0	0	0	0	0
hsa-miR-196b	0	0	0	0	0	3	0	0	0	0	0	0	0	0
hsa-miR-769-5p	0	0	0	0	0	1	2	0	0	0	0	0	0	0
hsa-miR-758	0	0	0	0	0	0	0	3	0	0	0	0	0	0
hsa-miR-1470	0	0	0	0	0	3	0	0	0	0	0	0	0	0
hsa-miR-144	0	0	0	0	0	0	0	0	0	0	0	0	3	0
hsa-miR-106b*	0	0	0	0	0	0	0	0	0	0	0	0	3	0
hsa-miR-1207-3p	0	0	0	0	0	1	2	0	0	0	0	0	0	0
hsa-miR-184	0	0	0	0	0	0	3	0	0	0	0	0	0	0
hsa-miR-194	0	0	0	0	0	0	0	0	1	0	0	1	1	0
hsa-miR-1299	0	0	0	0	0	0	1	2	0	0	0	0	0	0
hsa-miR-1293	0	0	0	0	0	1	2	0	0	0	0	0	0	0
hsa-miR-221	0	0	0	0	1	2	0	0	0	0	0	0	0	0
hsa-miR-128	0	0	0	0	0	0	0	0	3	0	0	0	0	0
hsa-miR-654-5p	0	0	0	0	0	0	0	0	0	0	0	3	0	0
hsa-miR-513c	0	0	0	0	0	0	3	0	0	0	0	0	0	0
hsa-miR-372	0	0	0	0	0	0	3	0	0	0	0	0	0	0
hsa-miR-659	0	0	0	0	0	3	0	0	0	0	0	0	0	0
hsa-miR-190	0	0	0	0	0	1	2	0	0	0	0	0	0	0
hsa-miR-494	0	0	0	0	0	0	0	0	3	0	0	0	0	0
hsa-miR-515-3p	0	0	0	0	0	0	3	0	0	0	0	0	0	0
hsa-miR-17	0	0	0	0	0	1	0	0	0	0	1	0	1	0
hsa-miR-24-2*	0	0	0	0	0	0	0	0	0	0	0	3	0	0
hsa-miR-1246	0	0	0	0	0	0	3	0	0	0	0	0	0	0
hsa-miR-20a*	0	0	1	0	0	0	0	0	0	0	0	2	0	0
hsa-miR-380	0	0	0	0	0	0	3	0	0	0	0	0	0	0
hsa-miR-193b*	0	0	0	0	0	0	2	1	0	0	0	0	0	0
hsa-miR-1225-3p	0	0	0	0	0	2	0	0	0	0	0	0	1	0
hsa-miR-302f	0	0	0	0	0	0	3	0	0	0	0	0	0	0
hsa-miR-561	0	0	0	0	0	0	2	0	0	0	0	0	0	0
hsa-miR-662	0	0	0	0	0	0	0	0	0	0	0	0	0	2
hsa-miR-1178	0	0	0	0	0	0	0	2	0	0	0	0	0	0
hsa-miR-519b-3p	0	0	0	0	0	0	2	0	0	0	0	0	0	0
hsa-miR-769-3p	0	0	0	0	0	2	0	0	0	0	0	0	0	0
hsa-miR-1227	0	0	0	0	0	0	2	0	0	0	0	0	0	0
hsa-miR-622	0	0	0	2	0	0	0	0	0	0	0	0	0	0
hsa-miR-944	0	0	0	0	0	0	1	1	0	0	0	0	0	0
hsa-miR-548h	0	0	0	0	0	0	2	0	0	0	0	0	0	0
hsa-miR-1468	0	0	0	0	0	0	2	0	0	0	0	0	0	0
hsa-miR-15b*	0	0	0	0	0	0	2	0	0	0	0	0	0	0
hsa-miR-371-5p	0	0	0	0	0	1	0	0	1	0	0	0	0	0
hsa-miR-615-3p	0	0	0	0	0	0	0	2	0	0	0	0	0	0
hsa-miR-1225-5p	0	0	0	0	0	1	1	0	0	0	0	0	0	0
hsa-let-7b*	0	0	0	0	0	1	1	0	0	0	0	0	0	0
hsa-miR-1254	0	0	0	2	0	0	0	0	0	0	0	0	0	0
hsa-miR-548c-3p	0	0	0	0	0	0	2	0	0	0	0	0	0	0
hsa-miR-526a	0	0	0	0	0	0	0	0	1	0	0	0	1	0
hsa-miR-1290	0	0	0	0	0	0	2	0	0	0	0	0	0	0
hsa-miR-450a	0	0	2	0	0	0	0	0	0	0	0	0	0	0
hsa-miR-520c-5p	0	0	0	0	0	0	0	0	1	0	0	0	1	0
hsa-miR-509-3-5p	0	0	0	0	0	0	0	0	1	0	0	0	1	0
hsa-miR-206	0	0	0	0	0	0	2	0	0	0	0	0	0	0
hsa-miR-188-5p	0	0	0	0	0	2	0	0	0	0	0	0	0	0
hsa-miR-581	0	0	0	0	0	0	2	0	0	0	0	0	0	0
hsa-miR-518d-5p	0	0	0	0	0	0	0	0	0	0	0	2	0	0
hsa-miR-26b*	0	0	0	0	0	0	2	0	0	0	0	0	0	0
hsa-miR-377	0	0	0	0	0	0	0	0	0	0	0	0	2	0
hsa-miR-517b	0	0	0	0	0	0	2	0	0	0	0	0	0	0
hsa-miR-601	0	0	0	0	0	0	2	0	0	0	0	0	0	0
hsa-miR-1915*	0	0	0	0	0	1	1	0	0	0	0	0	0	0
hsa-miR-337-3p	0	0	0	0	0	0	2	0	0	0	0	0	0	0
hsa-miR-95	0	0	0	0	0	0	2	0	0	0	0	0	0	0
hsa-miR-99b	0	0	0	0	0	1	0	0	0	0	0	0	1	0
hsa-miR-510	0	0	0	2	0	0	0	0	0	0	0	0	0	0
hsa-miR-922	0	0	0	0	0	0	0	0	0	0	0	0	2	0
hsa-miR-1231	0	0	0	0	0	0	0	0	0	0	0	2	0	0
hsa-miR-1914	0	0	0	0	0	1	0	0	0	0	0	0	1	0
hsa-miR-130b*	0	0	0	0	0	0	2	0	0	0	0	0	0	0
hsa-miR-299-3p	0	0	0	0	0	0	0	2	0	0	0	0	0	0
hsa-miR-181d	0	0	0	0	0	0	2	0	0	0	0	0	0	0
hsa-miR-335	0	0	0	0	0	0	0	0	1	0	0	1	0	0
hsa-miR-936	0	0	0	0	1	0	0	0	0	0	0	1	0	0
hsa-miR-302d*	0	0	0	0	0	0	1	0	1	0	0	0	0	0
hsa-miR-1301	0	0	0	0	0	0	0	0	0	0	0	0	2	0
hsa-let-7i*	0	0	0	0	0	0	0	0	1	0	0	0	1	0
hsa-miR-1305	0	0	0	0	0	1	0	0	0	0	0	0	0	1
hsa-miR-577	0	0	0	0	2	0	0	0	0	0	0	0	0	0
hsa-miR-625*	0	0	0	0	0	2	0	0	0	0	0	0	0	0
hsa-miR-1275	0	0	0	0	0	0	0	0	2	0	0	0	0	0
hsa-miR-196a	0	0	0	0	0	0	2	0	0	0	0	0	0	0
hsa-miR-1323	0	0	0	0	0	0	2	0	0	0	0	0	0	0
hsa-miR-185*	0	0	0	0	0	2	0	0	0	0	0	0	0	0
hsa-miR-150*	0	0	0	0	0	2	0	0	0	0	0	0	0	0
hsa-miR-30c-2*	0	0	0	0	0	1	0	0	0	0	0	0	0	0
hsa-miR-626	0	0	0	0	0	1	0	0	0	0	0	0	0	0
hsa-miR-526b*	0	0	0	0	0	0	1	0	0	0	0	0	0	0
hsa-miR-629*	0	0	0	0	0	0	1	0	0	0	0	0	0	0
hsa-miR-603	0	0	1	0	0	0	0	0	0	0	0	0	0	0
hsa-miR-497	0	0	0	0	0	0	0	0	0	0	0	0	1	0
hsa-miR-1255a	0	0	1	0	0	0	0	0	0	0	0	0	0	0
hsa-miR-653	0	0	0	0	0	0	1	0	0	0	0	0	0	0
hsa-miR-937	0	0	0	0	1	0	0	0	0	0	0	0	0	0
hsa-miR-520e	0	0	0	0	0	1	0	0	0	0	0	0	0	0
hsa-let-7g*	0	0	0	0	0	1	0	0	0	0	0	0	0	0
hsa-miR-599	0	0	0	0	0	1	0	0	0	0	0	0	0	0
hsa-miR-7-2*	0	0	0	0	0	0	1	0	0	0	0	0	0	0
hsa-miR-455-3p	0	0	0	0	0	0	0	0	0	0	0	0	1	0
hsa-miR-485-5p	0	0	0	0	0	0	0	0	0	0	0	0	0	1
hsa-miR-1249	0	0	0	0	0	1	0	0	0	0	0	0	0	0
hsa-miR-424	0	0	0	0	0	0	0	0	0	0	0	1	0	0
hsa-miR-767-5p	0	0	0	0	0	0	0	0	0	0	0	0	1	0
hsa-miR-222*	0	0	0	0	0	0	0	0	0	0	0	0	0	1
hsa-miR-875-5p	0	0	0	0	0	0	0	1	0	0	0	0	0	0
hsa-miR-154*	0	0	0	0	0	0	1	0	0	0	0	0	0	0
hsa-miR-129-5p	0	0	0	0	0	0	0	1	0	0	0	0	0	0
hsa-let-7a*	0	0	0	0	0	0	1	0	0	0	0	0	0	0
hsa-miR-1184	0	0	0	0	0	0	0	0	0	0	0	0	1	0
hsa-miR-30c-1*	0	0	0	0	0	1	0	0	0	0	0	0	0	0
hsa-miR-1271	1	0	0	0	0	0	0	0	0	0	0	0	0	0
hsa-miR-621	0	0	0	0	0	0	0	0	0	0	0	0	1	0
hsa-miR-141	0	0	0	0	0	0	1	0	0	0	0	0	0	0
hsa-miR-495	0	0	0	0	0	0	0	0	0	0	0	0	0	1
hsa-miR-877	0	0	0	0	0	0	0	0	1	0	0	0	0	0
hsa-miR-500*	0	0	0	0	0	0	0	0	0	0	0	1	0	0
hsa-miR-16-1*	0	0	0	0	1	0	0	0	0	0	0	0	0	0
hsa-miR-548m	0	0	0	0	0	0	1	0	0	0	0	0	0	0
hsa-miR-1202	0	0	0	0	0	0	0	0	0	0	0	0	1	0
hsa-miR-588	0	0	0	0	0	0	0	0	0	0	0	0	1	0
hsa-miR-1264	0	0	0	0	0	0	1	0	0	0	0	0	0	0
hsa-miR-585	0	0	0	0	0	1	0	0	0	0	0	0	0	0
hsa-miR-569	0	0	0	0	0	0	1	0	0	0	0	0	0	0
hsa-miR-129*	0	0	0	0	0	0	1	0	0	0	0	0	0	0
hsa-miR-886-5p	0	0	0	0	0	0	0	0	1	0	0	0	0	0
hsa-miR-610	0	0	0	0	0	0	0	0	1	0	0	0	0	0
hsa-miR-448	0	0	0	0	0	0	0	0	0	0	0	1	0	0
hsa-miR-517a	0	0	0	0	0	0	1	0	0	0	0	0	0	0
hsa-miR-373*	0	0	0	0	0	0	0	0	0	0	0	0	0	1
hsa-miR-1827	0	0	0	0	1	0	0	0	0	0	0	0	0	0
hsa-miR-302b	0	0	0	0	0	1	0	0	0	0	0	0	0	0
hsa-miR-433	0	0	0	0	0	0	0	0	0	0	0	0	1	0
hsa-miR-33b*	0	0	0	0	0	0	0	0	0	0	0	0	1	0
hsa-miR-920	0	0	0	0	0	0	1	0	0	0	0	0	0	0
hsa-miR-648	0	0	0	0	0	1	0	0	0	0	0	0	0	0
hsa-miR-499-5p	0	0	0	0	0	1	0	0	0	0	0	0	0	0
hsa-miR-617	0	0	0	0	0	0	1	0	0	0	0	0	0	0
hsa-miR-136	0	0	0	0	0	1	0	0	0	0	0	0	0	0
hsa-miR-379*	0	0	0	0	0	1	0	0	0	0	0	0	0	0
hsa-miR-523*	0	0	0	0	0	0	0	0	0	0	0	0	1	0
hsa-miR-551a	0	0	0	0	0	0	0	0	0	0	0	0	0	1
hsa-miR-545	0	0	1	0	0	0	0	0	0	0	0	0	0	0
hsa-miR-517*	0	0	0	0	1	0	0	0	0	0	0	0	0	0
hsa-miR-216a	0	0	0	0	0	1	0	0	0	0	0	0	0	0
hsa-miR-380*	0	0	0	1	0	0	0	0	0	0	0	0	0	0
hsa-miR-218-2*	0	0	1	0	0	0	0	0	0	0	0	0	0	0
hsa-miR-219-5p	0	0	0	0	0	0	0	0	1	0	0	0	0	0
hsa-miR-553	0	0	0	0	0	0	1	0	0	0	0	0	0	0
hsa-miR-335*	0	0	0	0	0	1	0	0	0	0	0	0	0	0
hsa-miR-671-3p	0	0	0	0	0	0	1	0	0	0	0	0	0	0
hsa-miR-572	0	0	0	0	0	0	0	0	1	0	0	0	0	0
hsa-miR-454	0	0	0	0	0	0	0	0	0	0	0	1	0	0
hsa-miR-126*	0	0	0	0	0	1	0	0	0	0	0	0	0	0
hsa-miR-548i	0	0	0	0	0	1	0	0	0	0	0	0	0	0
hsa-miR-587	0	0	0	0	0	1	0	0	0	0	0	0	0	0
hsa-miR-1279	0	0	0	0	0	0	1	0	0	0	0	0	0	0
hsa-miR-450b-3p	0	0	0	0	0	0	1	0	0	0	0	0	0	0
hsa-miR-487b	0	0	0	0	0	0	0	0	1	0	0	0	0	0
hsa-miR-1205	0	0	0	0	0	0	0	0	0	0	0	0	1	0
hsa-miR-921	0	0	0	0	0	0	0	0	1	0	0	0	0	0
hsa-miR-1306	0	0	0	0	0	1	0	0	0	0	0	0	0	0
hsa-miR-632	0	0	0	0	0	0	1	0	0	0	0	0	0	0
hsa-miR-342-5p	0	0	0	0	0	0	0	0	1	0	0	0	0	0
hsa-miR-628-5p	0	0	0	0	0	0	0	0	0	0	0	1	0	0
hsa-miR-548c-5p	0	0	0	0	0	0	1	0	0	0	0	0	0	0
hsa-miR-220a	0	0	1	0	0	0	0	0	0	0	0	0	0	0
hsa-miR-1262	0	0	0	0	0	0	1	0	0	0	0	0	0	0
hsa-miR-134	0	0	0	1	0	0	0	0	0	0	0	0	0	0
hsa-miR-744*	0	0	0	0	0	0	0	1	0	0	0	0	0	0
hsa-miR-892b	0	0	0	0	0	0	1	0	0	0	0	0	0	0
hsa-miR-518f*	0	0	0	0	0	0	0	0	0	0	0	0	1	0
hsa-miR-188-3p	0	0	0	0	0	0	0	0	0	0	0	1	0	0
hsa-let-7c*	0	0	0	0	0	0	1	0	0	0	0	0	0	0
hsa-miR-29c*	0	0	0	0	0	0	1	0	0	0	0	0	0	0
hsa-miR-521	0	0	0	0	0	0	1	0	0	0	0	0	0	0
hsa-miR-373	0	0	0	0	0	0	1	0	0	0	0	0	0	0
hsa-miR-146b-3p	0	0	0	0	0	0	0	0	0	0	0	1	0	0
hsa-miR-1913	0	0	0	0	0	0	0	0	0	0	0	0	1	0
hsa-miR-127-5p	0	0	0	0	0	0	0	0	0	0	0	1	0	0
hsa-miR-514	0	0	0	0	0	0	1	0	0	0	0	0	0	0
hsa-miR-519e*	0	0	0	0	1	0	0	0	0	0	0	0	0	0
hsa-miR-658	0	0	0	0	0	0	0	0	1	0	0	0	0	0
hsa-miR-455-5p	0	0	0	0	1	0	0	0	0	0	0	0	0	0
hsa-miR-548d-5p	0	0	0	0	0	0	1	0	0	0	0	0	0	0
hsa-miR-1229	0	0	0	0	0	1	0	0	0	0	0	0	0	0

## Sheet: gsMMD_down
	lung cancer	multiple sclerosis	other pancreatic tumors and diseases	pancreatitis	pancreatic cancer ductal	tumor of stomach	sarcoidosis	melanoma	wilms tumor	prostate cancer	acure myocard infarction	periodontitis	ovarian cancer	copd
hsa-miR-18b	32	0	0	0	1	65	50	0	5	0	3	50	0	0
hsa-miR-192*	3	46	1	2	0	0	0	34	0	0	83	0	0	0
hsa-let-7d	1	0	0	0	0	24	63	0	6	0	0	30	27	0
hsa-miR-126	22	0	0	0	0	0	88	0	17	0	0	8	1	0
hsa-miR-20b	31	0	0	0	0	0	96	0	9	0	0	0	0	0
hsa-miR-144*	13	0	0	0	0	65	24	0	4	22	0	0	6	0
hsa-miR-302a*	0	0	26	0	13	0	0	0	0	0	0	1	1	90
hsa-miR-144	1	0	0	0	0	2	99	0	11	4	0	13	0	0
hsa-miR-20a	13	0	0	0	0	0	98	0	12	1	0	0	0	0
hsa-miR-515-5p	0	0	0	0	0	4	0	37	0	70	11	0	0	0
hsa-miR-106a	7	0	0	0	0	1	100	0	8	0	0	4	0	0
hsa-miR-455-3p	0	1	10	1	3	0	0	84	0	1	16	0	0	0
hsa-miR-370	0	0	0	24	1	0	0	0	0	0	0	0	0	90
hsa-miR-103	17	0	0	0	0	0	93	0	4	0	0	0	0	0
hsa-miR-31*	0	0	0	11	12	1	0	68	0	11	10	0	0	0
hsa-miR-17	8	0	0	0	0	1	84	0	10	0	0	3	0	0
hsa-miR-662	0	0	0	11	0	0	0	0	0	0	0	0	2	90
hsa-miR-451	0	0	0	3	0	0	3	0	0	0	3	79	11	0
hsa-miR-374b	10	0	0	1	0	0	11	0	9	13	0	55	0	0
hsa-miR-141	0	0	0	0	0	0	0	0	10	0	0	0	0	88
hsa-miR-559	0	2	0	0	0	0	0	0	3	0	0	0	0	89
hsa-miR-628-5p	0	93	0	0	0	0	0	0	0	1	0	0	0	0
hsa-miR-891a	1	93	0	0	0	0	0	0	0	0	0	0	0	0
hsa-miR-1201	3	0	0	0	0	0	0	0	1	0	86	0	3	0
hsa-miR-320d	15	0	0	5	3	4	0	0	0	0	2	0	62	0
hsa-miR-597	0	0	0	1	0	0	0	0	0	0	0	0	0	89
hsa-miR-1911	0	0	1	3	0	0	0	0	0	0	0	0	0	85
hsa-miR-330-3p	0	0	0	0	0	5	0	25	0	58	1	0	0	0
hsa-miR-653	0	0	0	0	2	0	0	0	0	0	0	0	0	86
hsa-miR-1295	0	82	0	1	3	0	0	0	0	0	0	0	0	0
hsa-miR-452*	0	0	0	2	0	6	0	26	0	49	0	0	0	0
hsa-miR-1234	0	12	0	0	0	1	1	0	1	0	0	66	0	0
hsa-miR-148a	24	0	0	3	2	26	1	0	0	22	2	0	0	0
hsa-miR-136*	1	55	0	0	2	0	0	0	0	0	20	0	0	0
hsa-miR-487a	2	69	2	0	0	0	0	0	0	0	0	0	0	0
hsa-miR-517*	0	0	0	0	0	0	0	64	0	9	0	0	0	0
hsa-miR-516a-5p	2	0	0	0	0	0	0	55	0	10	5	0	0	0
hsa-let-7a	4	0	0	0	0	0	17	0	7	2	1	39	1	0
hsa-miR-127-5p	6	0	0	0	0	2	0	3	0	60	0	0	0	0
hsa-miR-720	0	0	0	4	3	10	0	0	0	0	0	0	52	0
hsa-miR-548p	1	0	0	4	0	0	0	8	0	55	0	0	0	1
hsa-miR-208b	0	0	0	0	0	0	0	0	0	0	66	0	0	0
hsa-miR-217	0	0	0	0	0	1	0	7	0	51	6	0	0	0
hsa-miR-574-5p	0	0	0	0	0	0	0	0	0	0	0	65	0	0
hsa-miR-195	1	0	0	0	0	3	0	0	0	61	0	0	0	0
hsa-miR-424	1	0	0	0	0	60	0	0	0	3	0	0	0	0
hsa-miR-363	1	0	0	0	0	1	46	0	10	0	0	6	0	0
hsa-miR-891b	0	51	1	0	0	0	0	11	0	0	0	0	0	0
hsa-miR-296-5p	35	0	0	2	0	0	0	0	8	0	0	9	9	0
hsa-miR-216a	0	1	0	0	0	0	0	39	0	4	18	0	0	0
hsa-miR-1913	6	2	0	0	0	6	0	0	11	29	0	8	0	0
hsa-miR-33b	0	0	0	2	3	0	0	48	0	9	0	0	0	0
hsa-miR-767-5p	0	0	0	0	0	0	0	15	0	43	2	0	0	0
hsa-let-7g	0	0	0	0	0	0	37	0	10	0	0	11	1	0
hsa-miR-138-2*	2	32	0	15	0	0	0	0	0	0	0	0	3	7
hsa-miR-328	0	0	24	18	4	0	0	0	0	0	2	3	8	0
hsa-let-7b	2	0	0	4	3	2	2	0	1	0	0	0	44	0
hsa-miR-210	0	0	0	0	3	29	0	0	2	0	0	19	4	0
hsa-miR-33a	0	0	0	0	1	0	0	0	0	0	56	0	0	0
hsa-miR-875-3p	3	53	0	0	0	0	0	0	0	0	0	0	0	0
hsa-miR-548a-3p	31	3	0	0	0	1	0	5	0	2	1	8	5	0
hsa-miR-324-3p	0	0	0	2	2	16	0	0	0	0	9	0	26	0
hsa-miR-425	0	0	0	0	0	21	0	0	5	0	0	28	0	0
hsa-miR-323-3p	0	0	0	0	0	0	0	0	0	0	0	0	10	44
hsa-miR-18a	35	0	0	0	0	12	4	0	3	0	0	0	0	0
hsa-miR-423-5p	0	0	0	3	2	13	0	0	0	0	15	0	19	0
hsa-miR-34c-3p	4	5	0	5	32	0	0	0	2	0	1	2	0	0
hsa-miR-1826	2	0	1	4	0	0	0	40	0	3	1	0	0	0
hsa-miR-508-5p	0	0	0	6	2	0	0	1	0	3	39	0	0	0
hsa-miR-197	0	0	0	5	0	19	0	0	0	0	0	0	26	0
hsa-miR-30b	30	0	0	0	0	3	0	0	8	0	0	8	0	0
hsa-miR-1297	0	14	13	0	16	0	0	0	0	0	5	0	0	1
hsa-miR-26b	3	0	0	1	0	0	8	0	3	1	0	32	1	0
hsa-miR-181c	11	5	5	21	1	2	0	0	0	0	0	0	3	0
hsa-miR-339-5p	0	0	1	1	3	26	0	0	0	0	7	6	4	0
hsa-miR-342-5p	0	0	0	23	24	0	0	0	0	0	0	0	1	0
hsa-miR-1305	16	5	3	1	6	0	0	1	2	5	5	3	1	0
hsa-miR-1291	0	0	0	0	0	2	0	0	0	0	44	0	0	0
hsa-miR-17*	0	0	0	0	0	45	0	0	0	0	1	0	0	0
hsa-miR-146a	2	0	0	0	0	5	0	0	0	0	0	0	38	0
hsa-miR-532-3p	0	0	0	2	0	5	0	0	0	0	6	0	32	0
hsa-miR-500	0	0	0	9	6	15	0	0	0	0	0	5	9	0
hsa-miR-646	0	0	0	0	0	3	0	5	0	36	0	0	0	0
hsa-miR-1322	3	32	0	0	0	4	0	0	0	4	0	0	0	0
hsa-miR-200b	1	0	0	0	31	0	0	0	6	0	0	0	4	1
hsa-miR-24-2*	3	0	0	0	0	2	0	9	0	28	1	0	0	0
hsa-miR-664	0	0	0	0	0	29	0	0	2	0	0	0	12	0
hsa-miR-1228	0	1	0	0	0	0	3	0	6	0	0	14	18	0
hsa-miR-628-3p	8	0	13	10	0	0	0	0	11	0	0	0	0	0
hsa-let-7f-1*	1	1	3	7	0	0	0	0	1	0	2	0	27	0
hsa-miR-450b-3p	0	0	3	3	29	0	0	0	7	0	0	0	0	0
hsa-miR-621	0	0	0	0	0	3	0	23	0	14	1	0	0	0
hsa-miR-541	0	14	19	0	0	0	0	1	0	1	5	0	0	0
hsa-miR-564	36	0	0	0	0	1	0	3	0	0	0	0	0	0
hsa-miR-1205	36	0	1	0	1	0	0	0	0	1	0	0	0	0
hsa-miR-129-3p	1	29	0	0	0	0	0	0	0	0	8	0	0	0
hsa-miR-378	0	0	2	0	27	6	0	0	3	0	0	0	0	0
hsa-miR-129*	6	0	0	0	0	0	0	0	0	0	5	0	0	27
hsa-miR-181a	8	0	0	0	0	27	0	0	1	0	0	0	2	0
hsa-miR-1256	0	38	0	0	0	0	0	0	0	0	0	0	0	0
hsa-let-7f-2*	1	0	0	0	34	0	0	0	0	0	0	0	3	0
hsa-miR-600	0	3	0	0	30	0	0	0	0	2	0	1	1	0
hsa-miR-1226*	0	0	0	0	0	0	0	15	0	8	14	0	0	0
hsa-miR-30c-1*	0	0	32	1	0	0	0	0	2	0	1	0	0	1
hsa-miR-593*	0	0	0	0	0	0	0	34	0	2	0	0	0	0
hsa-miR-1257	0	0	0	0	0	0	0	0	1	0	0	35	0	0
hsa-miR-122*	2	7	0	0	21	1	0	0	0	0	3	0	0	2
hsa-miR-550*	0	0	0	5	3	20	0	0	1	0	6	0	0	0
hsa-miR-1272	0	15	0	0	0	0	0	19	0	1	0	0	0	0
hsa-miR-30c	0	0	0	0	0	13	0	0	10	0	0	11	0	0
hsa-miR-28-3p	0	0	6	20	4	0	0	0	0	0	4	0	0	0
hsa-miR-1251	0	0	1	0	0	0	0	33	0	0	0	0	0	0
hsa-miR-10b*	0	0	0	0	0	0	0	0	0	0	34	0	0	0
hsa-miR-32	1	0	0	0	0	0	0	9	0	23	1	0	0	0
hsa-miR-652	0	0	0	0	0	29	0	0	0	0	0	2	3	0
hsa-miR-542-5p	0	1	0	3	29	0	0	0	0	0	0	0	0	0
hsa-miR-1286	3	0	0	0	0	0	0	30	0	0	0	0	0	0
hsa-miR-488*	9	0	0	0	0	0	0	0	0	0	24	0	0	0
hsa-miR-222*	1	0	12	0	16	0	0	0	0	0	0	0	0	3
hsa-miR-19b	0	0	0	0	0	10	0	0	0	0	0	22	0	0
hsa-miR-96*	0	0	0	0	1	1	0	1	0	7	22	0	0	0
hsa-miR-744	0	0	0	1	0	9	1	0	0	0	2	19	0	0
hsa-miR-374a*	0	0	0	0	0	0	0	0	6	0	0	0	25	1
hsa-miR-24	0	0	0	3	0	5	18	0	2	2	0	2	0	0
hsa-miR-219-1-3p	0	0	0	0	0	0	0	0	1	0	0	0	30	0
hsa-miR-551a	0	22	6	0	0	0	0	0	2	0	0	1	0	0
hsa-miR-9	0	0	28	2	1	0	0	0	0	0	0	0	0	0
hsa-miR-325	0	0	2	22	0	0	0	0	0	0	0	0	0	7
hsa-miR-527	1	0	0	0	0	0	0	1	0	29	0	0	0	0
hsa-miR-1283	2	4	0	0	0	0	0	20	0	2	2	0	0	1
hsa-miR-660	0	0	0	5	3	9	0	0	12	0	0	0	2	0
hsa-let-7i	0	0	0	1	0	9	10	0	4	1	0	4	2	0
hsa-miR-548c-3p	0	0	0	8	16	0	0	0	0	0	2	3	1	0
hsa-miR-93*	0	0	0	0	0	13	0	0	0	0	14	0	3	0
hsa-miR-1237	0	0	24	5	0	0	0	0	1	0	0	0	0	0
hsa-miR-595	0	0	0	0	0	0	0	0	8	0	5	17	0	0
hsa-miR-20a*	0	1	0	6	1	0	0	20	0	1	1	0	0	0
hsa-miR-382	0	0	0	13	0	0	0	0	7	0	0	10	0	0
hsa-miR-185*	0	0	20	0	4	0	0	0	1	0	0	5	0	0
hsa-miR-302b*	0	0	0	0	0	0	0	0	2	0	1	0	1	25
hsa-miR-10a*	0	0	0	0	0	0	0	0	0	0	0	0	29	0
hsa-miR-513c	0	0	27	1	0	0	0	0	1	0	0	0	0	0
hsa-miR-922	11	0	0	0	0	8	0	1	0	9	0	0	0	0
hsa-miR-520a-5p	24	0	3	0	0	0	0	0	0	2	0	0	0	0
hsa-miR-615-5p	0	0	1	0	0	0	0	0	5	0	0	0	1	21
hsa-miR-548h	0	0	0	0	0	0	0	0	1	0	0	3	24	0
hsa-miR-320c	5	0	0	1	1	11	0	0	0	0	0	0	10	0
hsa-miR-889	0	0	5	5	11	0	0	0	0	0	1	0	0	6
hsa-miR-1288	0	0	1	0	0	0	0	0	0	0	0	0	1	26
hsa-miR-509-5p	0	0	0	0	0	19	0	4	0	3	2	0	0	0
hsa-miR-548n	0	0	0	1	1	0	0	0	0	0	0	0	6	19
hsa-miR-30a*	1	0	20	0	0	0	0	0	6	0	0	0	0	0
hsa-miR-188-3p	0	0	1	0	0	0	0	0	0	4	22	0	0	0
hsa-miR-942	0	0	7	16	4	0	0	0	0	0	0	0	0	0
hsa-miR-1224-3p	0	0	0	0	0	0	0	0	6	0	0	17	3	0
hsa-miR-106a*	3	0	0	0	0	6	0	2	0	15	0	0	0	0
hsa-miR-648	1	1	19	0	4	0	0	0	0	0	0	0	1	0
hsa-miR-525-5p	0	0	0	1	25	0	0	0	0	0	0	0	0	0
hsa-miR-340*	0	0	2	23	0	0	0	0	0	0	0	0	0	0
hsa-miR-802	2	0	0	5	15	0	0	0	1	0	2	0	0	0
hsa-miR-1249	1	0	0	0	0	0	0	0	10	0	0	11	3	0
hsa-miR-609	0	0	1	0	24	0	0	0	0	0	0	0	0	0
hsa-let-7f	2	0	0	0	0	0	3	0	12	1	0	6	1	0
hsa-miR-7	0	0	1	0	20	0	0	0	0	0	0	0	4	0
hsa-miR-369-3p	1	0	12	2	0	0	0	0	3	0	0	1	6	0
hsa-miR-1183	3	14	0	3	0	0	0	0	0	0	3	0	0	2
hsa-miR-150	0	0	0	0	0	0	0	0	0	0	0	12	13	0
hsa-miR-1276	0	0	15	0	7	0	0	0	0	0	0	0	0	3
hsa-miR-497*	2	0	17	0	0	0	0	1	4	0	0	0	0	0
hsa-miR-635	8	0	3	0	0	0	0	12	0	1	0	0	0	0
hsa-miR-1267	0	0	0	15	0	0	0	0	9	0	0	0	0	0
hsa-miR-196a*	0	0	0	0	0	2	0	16	0	4	2	0	0	0
hsa-miR-1277	0	0	0	18	4	0	0	0	2	0	0	0	0	0
hsa-miR-1279	0	0	24	0	0	0	0	0	0	0	0	0	0	0
hsa-miR-548g	0	0	4	12	1	0	0	0	0	0	0	0	7	0
hsa-miR-106b	3	0	0	0	0	13	0	0	2	0	0	0	5	0
hsa-miR-497	3	0	0	0	0	1	0	4	0	15	0	0	0	0
hsa-miR-1185	0	0	0	4	0	0	0	0	19	0	0	0	0	0
hsa-miR-107	7	0	0	0	0	0	12	0	4	0	0	0	0	0
hsa-miR-495	0	0	0	0	15	0	0	0	1	0	0	1	6	0
hsa-miR-142-5p	15	0	0	0	0	0	0	0	8	0	0	0	0	0
hsa-miR-517c	0	0	0	0	23	0	0	0	0	0	0	0	0	0
hsa-miR-1909*	0	0	20	0	0	0	0	0	0	0	0	0	0	3
hsa-miR-493	0	0	0	3	0	0	0	0	0	0	0	0	20	0
hsa-miR-552	0	0	6	0	1	0	0	0	12	0	0	0	0	4
hsa-miR-19b-2*	0	0	0	0	21	0	0	0	0	0	0	0	2	0
hsa-miR-1292	0	0	0	20	2	0	0	0	1	0	0	0	0	0
hsa-miR-1229	2	4	0	0	0	3	0	0	4	0	1	3	6	0
hsa-miR-499-5p	0	0	0	0	2	0	0	0	10	0	0	0	10	0
hsa-miR-149	0	0	0	16	4	0	0	0	2	0	0	0	0	0
hsa-miR-553	3	0	0	1	15	0	0	0	3	0	0	0	0	0
hsa-miR-548d-3p	0	5	0	17	0	0	0	0	0	0	0	0	0	0
hsa-miR-492	2	0	0	4	0	0	0	0	0	0	16	0	0	0
hsa-miR-606	3	11	0	1	0	0	0	0	0	1	1	0	2	3
hsa-miR-556-5p	0	0	0	1	0	1	0	10	0	5	4	0	0	0
hsa-miR-486-3p	3	9	0	0	0	0	0	0	7	1	0	0	1	0
hsa-miR-148a*	0	0	20	0	1	0	0	0	0	0	0	0	0	0
hsa-miR-484	0	0	0	0	0	1	0	0	1	0	18	0	1	0
hsa-miR-1324	0	0	0	9	6	0	0	6	0	0	0	0	0	0
hsa-miR-643	0	0	18	0	0	0	0	0	1	0	0	0	2	0
hsa-miR-1207-3p	0	0	0	16	4	0	0	0	0	0	0	0	0	1
hsa-miR-28-5p	0	0	0	0	0	21	0	0	0	0	0	0	0	0
hsa-miR-563	0	0	1	16	0	0	0	0	0	0	0	0	4	0
hsa-let-7i*	1	0	0	0	0	1	0	1	0	18	0	0	0	0
hsa-miR-625*	7	0	1	2	2	0	0	0	3	2	1	2	1	0
hsa-miR-21*	10	0	0	2	0	1	0	7	0	1	0	0	0	0
hsa-miR-603	1	2	0	0	0	2	0	6	0	3	6	0	0	0
hsa-miR-636	0	0	0	0	1	0	0	0	0	0	19	0	0	0
hsa-miR-199a-5p	0	0	13	3	0	4	0	0	0	0	0	0	0	0
hsa-miR-518f	0	0	11	5	1	0	0	0	0	0	0	0	0	3
hsa-miR-657	1	0	0	0	19	0	0	0	0	0	0	0	0	0
hsa-let-7a*	5	0	2	9	0	0	0	0	3	0	0	0	1	0
hsa-miR-1269	0	0	2	17	1	0	0	0	0	0	0	0	0	0
hsa-miR-26b*	0	0	0	16	0	0	0	0	0	0	0	0	4	0
hsa-miR-190b	0	0	0	17	2	0	0	0	1	0	0	0	0	0
hsa-miR-19a*	0	0	0	0	0	0	0	0	20	0	0	0	0	0
hsa-miR-149*	0	0	0	3	0	15	0	0	0	0	2	0	0	0
hsa-miR-16-2*	3	0	3	0	0	0	0	0	3	0	4	4	3	0
hsa-miR-202	0	0	6	12	0	0	0	0	2	0	0	0	0	0
hsa-miR-155*	3	0	0	0	1	0	0	0	1	1	12	0	1	0
hsa-miR-634	3	0	1	6	0	1	0	0	2	0	2	1	3	0
hsa-miR-518d-5p	0	0	0	0	0	2	0	6	0	11	0	0	0	0
hsa-miR-584	0	0	10	4	1	0	0	0	4	0	0	0	0	0
hsa-miR-454	2	0	0	0	0	0	0	0	6	7	0	0	4	0
hsa-miR-26a-1*	0	0	0	2	17	0	0	0	0	0	0	0	0	0
hsa-miR-1306	0	0	0	0	0	0	0	0	0	0	0	19	0	0
hsa-miR-302c*	0	2	5	1	1	0	0	0	10	0	0	0	0	0
hsa-miR-183	0	0	12	0	3	0	0	0	4	0	0	0	0	0
hsa-miR-380	6	0	2	0	0	0	0	0	8	0	0	0	3	0
hsa-miR-548c-5p	0	0	0	0	0	0	0	0	0	0	0	0	19	0
hsa-miR-1200	2	11	5	0	1	0	0	0	0	0	0	0	0	0
hsa-miR-150*	0	0	2	17	0	0	0	0	0	0	0	0	0	0
hsa-miR-27a	0	0	0	1	0	1	11	0	0	0	0	5	0	0
hsa-miR-93	3	0	0	0	0	1	3	0	9	0	0	2	0	0
hsa-miR-599	0	0	0	0	0	0	0	0	2	0	0	7	9	0
hsa-miR-200a	0	0	0	0	0	0	0	9	0	0	9	0	0	0
hsa-miR-526a	0	0	0	1	4	0	0	0	0	13	0	0	0	0
hsa-miR-100*	0	0	0	1	10	0	0	0	0	0	7	0	0	0
hsa-miR-21	0	0	2	0	0	2	4	0	10	0	0	0	0	0
hsa-miR-545	0	0	3	0	0	0	0	14	0	1	0	0	0	0
hsa-miR-211	0	0	3	15	0	0	0	0	0	0	0	0	0	0
hsa-miR-380*	2	0	0	0	2	0	0	0	0	0	0	0	0	14
hsa-miR-548i	0	0	11	4	3	0	0	0	0	0	0	0	0	0
hsa-miR-326	0	0	0	18	0	0	0	0	0	0	0	0	0	0
hsa-miR-490-5p	17	0	0	0	0	0	0	0	0	1	0	0	0	0
hsa-miR-203	0	0	18	0	0	0	0	0	0	0	0	0	0	0
hsa-miR-1184	0	0	0	0	0	5	0	4	0	8	0	0	0	0
hsa-miR-489	0	0	0	0	0	2	0	0	0	4	11	0	0	0
hsa-miR-202*	4	0	1	2	3	0	0	5	0	1	0	0	1	0
hsa-miR-654-5p	0	0	0	0	0	0	0	7	0	3	7	0	0	0
hsa-miR-30a	0	0	0	0	0	9	0	0	1	0	0	0	7	0
hsa-miR-1912	0	1	0	2	0	0	0	7	0	6	1	0	0	0
hsa-miR-218-1*	1	0	0	0	0	0	0	0	1	0	14	0	1	0
hsa-miR-301a	1	0	0	0	0	14	1	0	0	1	0	0	0	0
hsa-miR-367	0	15	1	1	0	0	0	0	0	0	0	0	0	0
hsa-miR-491-5p	0	0	0	11	4	0	0	0	0	0	0	0	2	0
hsa-miR-1268	0	0	0	0	0	0	0	0	10	0	0	6	0	0
hsa-miR-320b	0	0	0	1	0	5	0	0	0	0	1	0	9	0
hsa-miR-671-5p	0	0	16	0	0	0	0	0	0	0	0	0	0	0
hsa-miR-504	0	0	1	14	0	0	0	0	0	0	0	0	1	0
hsa-miR-601	0	0	0	0	0	0	0	0	0	0	0	16	0	0
hsa-miR-1915*	0	0	0	13	0	0	0	0	1	0	0	0	2	0
hsa-miR-99b	0	3	9	0	4	0	0	0	0	0	0	0	0	0
hsa-miR-424*	7	0	0	0	0	5	0	0	0	0	0	0	4	0
hsa-miR-155	3	0	1	0	0	0	0	0	12	0	0	0	0	0
hsa-miR-214*	0	0	16	0	0	0	0	0	0	0	0	0	0	0
hsa-miR-25	0	0	0	0	0	5	0	0	2	0	0	9	0	0
hsa-miR-629*	0	0	0	12	0	0	0	0	3	0	0	0	0	0
hsa-miR-99a	0	0	0	3	10	0	0	0	0	0	2	0	0	0
hsa-miR-186	0	0	2	0	11	0	0	0	0	0	0	1	1	0
hsa-miR-591	0	0	10	0	5	0	0	0	0	0	0	0	0	0
hsa-miR-548o	6	0	0	2	2	1	0	0	0	0	3	0	0	1
hsa-miR-331-3p	0	0	0	0	0	14	0	0	0	0	0	0	1	0
hsa-miR-580	0	14	0	0	0	0	0	0	0	0	0	0	0	1
hsa-miR-936	0	5	0	9	1	0	0	0	0	0	0	0	0	0
hsa-miR-1262	0	0	0	12	0	0	0	0	0	0	0	0	3	0
hsa-miR-576-5p	0	0	0	10	5	0	0	0	0	0	0	0	0	0
hsa-miR-934	2	0	0	0	2	0	0	0	1	0	7	0	0	2
hsa-miR-384	0	0	2	1	0	0	0	0	0	0	0	0	0	11
hsa-miR-329	10	0	0	1	1	0	0	0	2	0	0	0	0	0
hsa-miR-485-5p	1	2	7	0	4	0	0	0	0	0	0	0	0	0
hsa-miR-1259	0	6	0	0	0	0	0	0	1	0	0	7	0	0
hsa-miR-588	1	3	0	0	0	0	0	10	0	0	0	0	0	0
hsa-miR-583	0	0	0	0	0	0	0	0	10	0	0	0	4	0
hsa-miR-513b	0	1	0	0	1	0	0	0	3	0	9	0	0	0
hsa-miR-221*	0	2	2	5	0	0	0	5	0	0	0	0	0	0
hsa-miR-148b	0	0	0	0	0	12	0	0	0	1	1	0	0	0
hsa-miR-1471	0	1	0	0	6	1	0	3	0	2	0	0	0	1
hsa-miR-220a	1	0	0	1	12	0	0	0	0	0	0	0	0	0
hsa-miR-302f	0	0	14	0	0	0	0	0	0	0	0	0	0	0
hsa-miR-519b-5p	0	0	2	0	0	0	0	1	0	5	4	1	0	0
hsa-miR-200a*	2	0	4	0	1	0	0	0	3	0	0	0	0	3
hsa-miR-1281	0	0	0	0	0	0	0	0	4	0	0	5	4	0
hsa-miR-483-3p	0	0	0	3	10	0	0	0	0	0	0	0	0	0
hsa-miR-135a	0	0	13	0	0	0	0	0	0	0	0	0	0	0
hsa-miR-877	0	0	0	0	7	0	0	0	1	0	0	0	5	0
hsa-miR-509-3p	0	0	13	0	0	0	0	0	0	0	0	0	0	0
hsa-miR-1233	0	0	0	0	12	0	0	0	0	0	0	0	0	1
hsa-miR-520h	0	0	0	4	4	0	0	0	3	0	0	0	2	0
hsa-miR-1308	0	0	0	9	1	0	0	0	0	0	1	0	0	2
hsa-miR-629	0	0	0	11	0	0	0	0	0	0	0	1	1	0
hsa-miR-886-3p	3	0	0	0	1	0	0	0	0	0	0	3	3	3
hsa-miR-95	0	0	8	0	0	0	0	0	5	0	0	0	0	0
hsa-miR-342-3p	1	0	0	0	0	8	0	0	0	0	4	0	0	0
hsa-miR-892b	1	0	1	6	1	0	0	0	2	0	0	0	2	0
hsa-miR-518f*	2	0	3	0	0	0	0	0	0	8	0	0	0	0
hsa-miR-27b	1	4	0	3	5	0	0	0	0	0	0	0	0	0
hsa-miR-431*	2	0	8	0	0	0	0	0	2	0	0	0	0	0
hsa-miR-24-1*	5	0	0	0	0	0	0	0	0	1	5	0	0	1
hsa-miR-376a*	0	0	0	0	0	0	0	0	0	0	0	1	11	0
hsa-miR-760	0	0	0	0	1	0	0	0	9	0	0	2	0	0
hsa-miR-361-3p	2	0	0	9	0	0	0	0	0	1	0	0	0	0
hsa-miR-548a-5p	0	0	0	0	0	0	0	0	4	0	0	8	0	0
hsa-miR-1243	0	4	5	3	0	0	0	0	0	0	0	0	0	0
hsa-miR-1247	1	0	6	0	0	0	0	0	5	0	0	0	0	0
hsa-miR-377	2	0	4	0	0	0	0	4	0	2	0	0	0	0
hsa-let-7c	1	0	0	0	0	3	0	0	2	0	0	1	5	0
hsa-miR-453	0	0	0	0	0	0	0	0	2	0	0	10	0	0
hsa-miR-214	0	0	0	0	0	11	0	1	0	0	0	0	0	0
hsa-miR-659	0	0	0	3	0	0	0	0	3	0	0	1	5	0
hsa-miR-195*	0	0	0	1	3	0	0	0	8	0	0	0	0	0
hsa-miR-519a*	6	0	0	0	0	1	0	0	0	5	0	0	0	0
hsa-miR-675	0	0	12	0	0	0	0	0	0	0	0	0	0	0
hsa-miR-598	0	0	0	0	0	0	0	0	12	0	0	0	0	0
hsa-miR-191*	4	0	4	0	2	0	0	0	0	0	0	1	0	0
hsa-miR-125b	0	0	2	0	2	1	0	0	0	0	0	1	5	0
hsa-miR-616*	0	0	3	0	0	0	0	0	0	0	8	0	0	0
hsa-miR-765	0	0	0	0	0	0	0	0	7	0	0	4	0	0
hsa-miR-220c	1	0	0	0	0	0	0	2	0	1	7	0	0	0
hsa-miR-182*	0	0	0	0	2	0	0	0	5	0	2	0	1	1
hsa-miR-411	0	0	0	0	0	0	0	0	10	0	0	0	1	0
hsa-miR-184	0	0	0	0	11	0	0	0	0	0	0	0	0	0
hsa-miR-1206	0	2	9	0	0	0	0	0	0	0	0	0	0	0
hsa-miR-29c	0	0	0	0	0	0	0	0	11	0	0	0	0	0
hsa-miR-371-3p	1	0	7	2	0	0	0	0	1	0	0	0	0	0
hsa-miR-323-5p	0	0	0	0	2	0	0	0	9	0	0	0	0	0
hsa-miR-885-3p	1	0	0	0	0	9	0	0	0	0	1	0	0	0
hsa-miR-518b	3	0	0	5	0	0	0	0	0	0	0	0	0	3
hsa-miR-181b	0	0	10	1	0	0	0	0	0	0	0	0	0	0
hsa-miR-374a	0	0	0	0	0	0	0	0	7	4	0	0	0	0
hsa-miR-124*	0	0	3	4	4	0	0	0	0	0	0	0	0	0
hsa-miR-29c*	0	0	7	0	3	0	0	0	0	0	0	0	1	0
hsa-miR-1238	0	0	0	9	0	0	0	0	2	0	0	0	0	0
hsa-miR-101	0	0	0	0	0	0	1	0	10	0	0	0	0	0
hsa-miR-708*	0	1	1	0	9	0	0	0	0	0	0	0	0	0
hsa-miR-892a	0	0	8	3	0	0	0	0	0	0	0	0	0	0
hsa-miR-766	0	10	0	0	0	0	0	0	0	0	0	0	1	0
hsa-miR-1298	0	0	0	0	0	0	0	0	11	0	0	0	0	0
hsa-miR-324-5p	0	0	9	2	0	0	0	0	0	0	0	0	0	0
hsa-miR-1227	0	0	10	0	0	0	0	0	0	0	0	0	0	0
hsa-miR-944	0	0	0	0	0	0	0	0	0	0	0	0	10	0
hsa-miR-1908	0	0	0	0	0	10	0	0	0	0	0	0	0	0
hsa-miR-133b	0	0	0	0	0	0	0	0	3	0	0	1	6	0
hsa-miR-34a	0	0	0	3	7	0	0	0	0	0	0	0	0	0
hsa-miR-145*	1	0	0	0	0	0	0	0	7	0	2	0	0	0
hsa-miR-374b*	0	0	0	1	0	0	0	0	0	0	0	0	9	0
hsa-miR-570	3	6	0	0	1	0	0	0	0	0	0	0	0	0
hsa-miR-1470	2	0	0	0	0	0	0	0	0	0	0	5	3	0
hsa-miR-509-3-5p	0	0	0	0	0	2	0	1	0	7	0	0	0	0
hsa-miR-877*	0	0	0	2	1	0	0	0	2	0	0	2	3	0
hsa-miR-188-5p	2	0	2	0	4	0	0	0	0	0	1	0	0	1
hsa-miR-130a*	0	0	0	0	0	0	0	0	2	0	0	8	0	0
hsa-miR-888*	0	0	7	0	3	0	0	0	0	0	0	0	0	0
hsa-miR-582-5p	0	0	0	0	0	0	0	0	0	0	0	0	10	0
hsa-miR-18a*	0	0	0	0	0	9	0	0	0	0	1	0	0	0
hsa-miR-590-5p	6	0	0	0	0	1	0	3	0	0	0	0	0	0
hsa-miR-181c*	1	0	1	7	1	0	0	0	0	0	0	0	0	0
hsa-miR-551b	3	0	7	0	0	0	0	0	0	0	0	0	0	0
hsa-miR-138-1*	10	0	0	0	0	0	0	0	0	0	0	0	0	0
hsa-miR-187	1	0	0	0	0	0	0	0	0	0	0	9	0	0
hsa-miR-627	0	0	0	0	5	0	0	0	1	1	3	0	0	0
hsa-miR-491-3p	0	6	0	0	0	0	0	0	0	0	4	0	0	0
hsa-miR-1323	0	0	4	6	0	0	0	0	0	0	0	0	0	0
hsa-miR-579	0	0	0	5	3	0	0	0	1	0	0	0	0	0
hsa-miR-483-5p	5	0	0	0	0	0	2	2	0	0	0	0	0	0
hsa-miR-409-5p	0	0	0	9	0	0	0	0	0	0	0	0	0	0
hsa-miR-34a*	8	0	0	0	0	0	0	0	0	0	1	0	0	0
hsa-miR-582-3p	0	0	0	0	0	0	0	0	2	0	6	0	1	0
hsa-miR-216b	0	0	1	1	1	0	0	1	0	4	1	0	0	0
hsa-miR-152	2	0	0	0	0	3	0	0	0	4	0	0	0	0
hsa-miR-545*	0	0	0	0	1	0	0	0	4	0	0	0	4	0
hsa-miR-423-3p	0	0	0	0	0	4	0	0	0	0	1	4	0	0
hsa-miR-1293	0	0	0	0	0	0	0	0	4	0	0	5	0	0
hsa-miR-205	2	0	0	2	0	0	0	0	0	0	0	2	2	1
hsa-miR-644	0	0	0	0	2	0	0	0	4	0	0	3	0	0
hsa-miR-30d	4	0	0	0	2	3	0	0	0	0	0	0	0	0
hsa-miR-522*	1	0	0	0	0	0	0	7	0	1	0	0	0	0
hsa-miR-1274a	0	0	0	0	9	0	0	0	0	0	0	0	0	0
hsa-miR-302d*	0	0	0	0	0	0	0	0	4	0	2	0	1	2
hsa-miR-548b-3p	7	0	0	0	0	0	0	0	1	0	0	0	1	0
hsa-miR-135a*	0	0	8	0	0	0	0	0	1	0	0	0	0	0
hsa-miR-30e	1	0	4	0	0	3	0	0	0	0	0	1	0	0
hsa-miR-139-3p	0	8	0	0	1	0	0	0	0	0	0	0	0	0
hsa-miR-532-5p	0	0	1	0	1	0	3	0	0	0	0	3	0	0
hsa-miR-567	2	0	0	0	0	0	0	0	6	0	0	0	0	0
hsa-miR-888	0	0	3	0	0	0	0	0	0	0	0	0	5	0
hsa-miR-132	0	0	0	1	0	0	0	0	0	4	3	0	0	0
hsa-miR-1911*	8	0	0	0	0	0	0	0	0	0	0	0	0	0
hsa-miR-1255b	0	1	0	0	7	0	0	0	0	0	0	0	0	0
hsa-miR-607	1	0	0	0	7	0	0	0	0	0	0	0	0	0
hsa-miR-193a-5p	0	0	0	0	0	0	0	0	5	0	0	1	2	0
hsa-miR-520d-5p	0	1	0	0	0	0	0	0	0	0	7	0	0	0
hsa-miR-34b	2	2	1	0	0	0	0	0	0	0	1	1	1	0
hsa-miR-92a-2*	0	0	0	0	0	0	0	0	0	0	0	8	0	0
hsa-let-7d*	0	0	1	0	4	0	0	0	0	0	3	0	0	0
hsa-miR-647	0	8	0	0	0	0	0	0	0	0	0	0	0	0
hsa-miR-510	1	0	0	0	1	0	0	0	0	0	2	0	0	4
hsa-miR-671-3p	4	0	0	0	0	0	0	0	4	0	0	0	0	0
hsa-miR-410	0	5	0	0	0	1	0	0	2	0	0	0	0	0
hsa-miR-589	0	1	7	0	0	0	0	0	0	0	0	0	0	0
hsa-miR-105	3	0	1	0	1	0	0	0	3	0	0	0	0	0
hsa-miR-29b	1	0	0	0	0	0	0	0	7	0	0	0	0	0
hsa-miR-218	0	0	0	0	6	0	0	0	2	0	0	0	0	0
hsa-miR-223*	8	0	0	0	0	0	0	0	0	0	0	0	0	0
hsa-miR-1285	0	0	0	0	0	7	0	1	0	0	0	0	0	0
hsa-miR-608	0	0	0	0	0	0	0	0	4	0	0	3	0	0
hsa-miR-29a*	0	0	3	4	0	0	0	0	0	0	0	0	0	0
hsa-miR-361-5p	0	0	0	0	0	3	0	0	0	0	0	3	1	0
hsa-miR-339-3p	0	0	0	0	0	7	0	0	0	0	0	0	0	0
hsa-miR-26a	1	0	0	0	0	0	0	0	0	0	0	6	0	0
hsa-miR-1271	0	0	0	0	0	4	0	0	1	0	0	2	0	0
hsa-miR-432*	0	0	1	2	0	0	0	0	4	0	0	0	0	0
hsa-miR-758	0	0	6	0	0	0	0	0	1	0	0	0	0	0
hsa-miR-212	1	1	0	2	0	0	0	0	2	0	0	0	1	0
hsa-miR-15a	1	0	0	0	0	0	0	0	6	0	0	0	0	0
hsa-miR-26a-2*	0	0	6	0	1	0	0	0	0	0	0	0	0	0
hsa-miR-421	3	0	0	0	0	0	0	0	0	0	0	3	1	0
hsa-miR-1250	0	0	0	0	0	0	0	0	7	0	0	0	0	0
hsa-miR-199b-3p	4	0	0	0	0	0	0	0	0	0	0	0	3	0
hsa-miR-33b*	1	0	2	0	1	0	0	0	0	3	0	0	0	0
hsa-miR-379*	0	1	6	0	0	0	0	0	0	0	0	0	0	0
hsa-miR-656	0	1	0	0	0	0	0	0	3	0	3	0	0	0
hsa-miR-376c	1	6	0	0	0	0	0	0	0	0	0	0	0	0
hsa-miR-221	5	0	0	0	1	0	0	0	1	0	0	0	0	0
hsa-miR-19a	0	0	0	0	0	5	0	0	0	1	0	1	0	0
hsa-miR-566	6	0	0	0	0	0	0	0	0	0	1	0	0	0
hsa-miR-624*	0	0	0	0	0	0	0	0	5	0	0	2	0	0
hsa-miR-613	0	0	2	0	0	0	0	0	1	0	0	0	4	0
hsa-miR-618	1	0	2	2	0	0	0	0	2	0	0	0	0	0
hsa-miR-338-3p	0	0	0	0	0	0	0	0	0	7	0	0	0	0
hsa-miR-10a	3	0	0	0	0	0	0	0	4	0	0	0	0	0
hsa-miR-933	0	0	0	0	0	1	0	4	0	2	0	0	0	0
hsa-miR-655	0	0	0	0	0	0	0	0	3	0	0	0	2	1
hsa-miR-626	3	0	0	3	0	0	0	0	0	0	0	0	0	0
hsa-miR-9*	0	3	0	1	1	0	0	0	0	1	0	0	0	0
hsa-miR-1273	3	1	0	0	0	0	0	1	0	0	0	0	1	0
hsa-miR-604	2	2	1	1	0	0	0	0	0	0	0	0	0	0
hsa-miR-371-5p	1	0	2	0	0	0	0	0	0	0	3	0	0	0
hsa-miR-33a*	6	0	0	0	0	0	0	0	0	0	0	0	0	0
hsa-miR-92b*	0	0	0	5	1	0	0	0	0	0	0	0	0	0
hsa-miR-1236	0	0	0	0	0	0	0	0	0	0	0	0	6	0
hsa-miR-106b*	0	0	0	5	0	1	0	0	0	0	0	0	0	0
hsa-miR-433	0	0	0	0	0	2	0	0	0	2	2	0	0	0
hsa-miR-200c*	1	0	0	1	0	0	0	0	0	0	0	0	0	4
hsa-miR-181a*	0	0	1	1	2	0	0	0	2	0	0	0	0	0
hsa-miR-128	0	0	0	0	0	1	0	0	0	0	5	0	0	0
hsa-miR-1197	1	0	0	0	0	0	0	0	4	0	0	1	0	0
hsa-miR-548f	0	0	2	1	0	0	0	0	1	0	2	0	0	0
hsa-miR-572	0	0	0	0	0	0	0	0	0	0	0	0	0	6
hsa-let-7e	0	0	0	0	0	0	2	0	3	0	0	1	0	0
hsa-miR-665	3	0	2	0	1	0	0	0	0	0	0	0	0	0
hsa-miR-130b*	0	0	0	0	0	0	0	0	2	0	0	0	4	0
hsa-miR-632	0	0	0	0	3	0	0	0	3	0	0	0	0	0
hsa-miR-518e*	0	0	0	0	0	0	0	2	0	4	0	0	0	0
hsa-miR-1301	0	0	0	0	0	0	0	4	0	2	0	0	0	0
hsa-miR-1225-3p	3	1	0	0	0	0	0	0	2	0	0	0	0	0
hsa-miR-7-1*	0	0	1	0	0	0	0	0	0	0	5	0	0	0
hsa-miR-521	0	0	0	0	0	0	0	0	6	0	0	0	0	0
hsa-miR-146b-3p	0	0	0	0	5	0	0	0	0	0	1	0	0	0
hsa-miR-523	2	2	2	0	0	0	0	0	0	0	0	0	0	0
hsa-miR-1280	2	0	0	0	1	0	0	0	0	0	0	2	1	0
hsa-miR-1244	0	0	0	6	0	0	0	0	0	0	0	0	0	0
hsa-miR-340	1	0	0	0	0	0	0	0	4	0	0	0	0	0
hsa-miR-140-5p	0	0	5	0	0	0	0	0	0	0	0	0	0	0
hsa-miR-518d-3p	4	0	0	0	1	0	0	0	0	0	0	0	0	0
hsa-miR-502-5p	0	0	0	0	0	0	0	0	0	0	0	0	5	0
hsa-miR-1910	0	0	2	0	0	0	0	0	3	0	0	0	0	0
hsa-miR-1252	0	0	0	0	0	0	0	0	3	0	0	0	2	0
hsa-miR-519c-5p	0	0	0	0	0	0	0	0	0	5	0	0	0	0
hsa-miR-7-2*	4	0	0	0	0	0	0	0	0	0	0	0	1	0
hsa-miR-1914*	0	0	0	2	0	0	0	0	0	0	0	0	3	0
hsa-miR-550	0	0	1	0	0	0	0	0	0	0	4	0	0	0
hsa-miR-296-3p	1	0	0	0	0	0	0	0	0	0	0	4	0	0
hsa-miR-15b*	0	1	0	0	3	0	0	0	1	0	0	0	0	0
hsa-miR-556-3p	0	0	0	0	0	0	0	0	0	0	0	0	5	0
hsa-miR-631	0	0	0	0	1	0	0	4	0	0	0	0	0	0
hsa-miR-32*	0	0	0	2	0	0	0	0	2	0	1	0	0	0
hsa-miR-449a	0	0	4	0	1	0	0	0	0	0	0	0	0	0
hsa-miR-520c-5p	0	0	0	0	1	0	0	0	0	4	0	0	0	0
hsa-miR-16-1*	0	0	0	0	3	0	0	0	2	0	0	0	0	0
hsa-miR-127-3p	0	0	1	3	0	0	0	0	1	0	0	0	0	0
hsa-miR-575	0	0	0	0	0	0	0	5	0	0	0	0	0	0
hsa-miR-935	0	0	2	0	0	0	0	0	2	0	0	0	1	0
hsa-miR-191	0	0	0	0	0	0	0	0	0	0	0	5	0	0
hsa-miR-219-2-3p	0	0	4	0	1	0	0	0	0	0	0	0	0	0
hsa-miR-568	0	0	2	2	0	0	0	0	0	0	1	0	0	0
hsa-miR-633	0	0	0	2	0	0	0	2	0	0	0	0	1	0
hsa-miR-920	0	0	0	0	0	0	0	0	5	0	0	0	0	0
hsa-miR-153	0	0	0	0	0	0	0	1	0	1	3	0	0	0
hsa-miR-215	0	0	0	0	0	0	0	0	5	0	0	0	0	0
hsa-miR-92a	0	0	0	0	0	0	0	0	0	0	0	2	3	0
hsa-miR-183*	0	0	0	0	0	0	0	0	5	0	0	0	0	0
hsa-miR-19b-1*	0	0	0	0	0	0	0	0	5	0	0	0	0	0
hsa-miR-139-5p	0	0	0	0	1	0	0	3	0	0	1	0	0	0
hsa-miR-940	3	0	0	0	0	0	0	0	1	0	0	0	1	0
hsa-miR-1266	1	1	0	0	0	0	0	0	0	3	0	0	0	0
hsa-miR-151-3p	0	0	0	0	1	2	0	0	0	0	1	0	1	0
hsa-miR-362-5p	0	0	2	1	1	0	0	0	1	0	0	0	0	0
hsa-miR-181d	1	0	0	0	2	0	0	0	2	0	0	0	0	0
hsa-miR-519d	1	1	0	0	1	0	0	0	2	0	0	0	0	0
hsa-miR-193b*	0	0	0	0	0	0	0	0	0	0	0	5	0	0
hsa-miR-557	1	0	0	0	3	0	0	0	0	0	0	0	0	1
hsa-miR-873	4	0	0	0	1	0	0	0	0	0	0	0	0	0
hsa-miR-1208	2	0	0	0	0	0	0	3	0	0	0	0	0	0
hsa-miR-663b	0	0	0	0	3	0	0	0	1	0	0	0	0	0
hsa-miR-561	1	0	1	0	0	0	0	0	0	0	0	0	0	2
hsa-miR-524-3p	4	0	0	0	0	0	0	0	0	0	0	0	0	0
hsa-miR-637	4	0	0	0	0	0	0	0	0	0	0	0	0	0
hsa-miR-20b*	0	0	0	0	0	0	0	0	1	0	3	0	0	0
hsa-miR-1178	0	0	0	0	0	0	0	0	4	0	0	0	0	0
hsa-miR-519b-3p	0	0	0	0	0	0	0	0	0	0	0	0	0	4
hsa-miR-331-5p	0	0	0	0	0	0	0	0	4	0	0	0	0	0
hsa-miR-493*	0	0	0	0	0	0	0	0	3	0	0	1	0	0
hsa-miR-431	0	0	0	0	0	0	0	4	0	0	0	0	0	0
hsa-miR-622	0	0	4	0	0	0	0	0	0	0	0	0	0	0
hsa-miR-649	0	0	0	0	0	0	0	0	0	0	0	0	3	1
hsa-miR-573	0	2	0	2	0	0	0	0	0	0	0	0	0	0
hsa-miR-642	0	0	2	1	0	0	0	0	0	0	0	1	0	0
hsa-miR-1263	1	0	0	0	0	0	0	0	1	0	0	0	0	2
hsa-miR-29a	0	0	0	0	0	4	0	0	0	0	0	0	0	0
hsa-miR-383	0	4	0	0	0	0	0	0	0	0	0	0	0	0
hsa-miR-614	0	0	4	0	0	0	0	0	0	0	0	0	0	0
hsa-miR-375	0	0	0	0	0	0	0	0	4	0	0	0	0	0
hsa-miR-1294	0	0	0	0	0	0	0	0	4	0	0	0	0	0
hsa-miR-1181	0	0	0	0	0	0	0	1	0	0	0	3	0	0
hsa-miR-1264	0	0	0	0	0	0	0	0	4	0	0	0	0	0
hsa-miR-585	0	0	0	0	0	0	0	0	0	0	0	3	1	0
hsa-miR-30e*	0	0	0	0	0	0	0	0	0	0	0	0	1	3
hsa-miR-92b	0	0	2	0	1	0	0	0	0	0	0	1	0	0
hsa-miR-98	0	0	0	0	0	0	0	0	0	0	0	0	4	0
hsa-miR-617	0	0	0	0	0	0	0	0	3	0	0	0	1	0
hsa-miR-99a*	0	0	0	2	0	0	0	0	2	0	0	0	0	0
hsa-miR-185	0	0	0	0	0	0	0	0	0	0	0	2	2	0
hsa-miR-146a*	0	0	0	0	2	0	0	1	0	1	0	0	0	0
hsa-miR-335*	2	0	0	2	0	0	0	0	0	0	0	0	0	0
hsa-miR-105*	0	0	0	0	1	0	0	0	3	0	0	0	0	0
hsa-miR-125a-5p	0	0	1	1	2	0	0	0	0	0	0	0	0	0
hsa-miR-141*	0	0	3	0	0	0	0	0	0	0	0	0	0	1
hsa-miR-301b	1	0	0	1	0	0	0	2	0	0	0	0	0	0
hsa-miR-640	0	0	3	0	0	0	0	1	0	0	0	0	0	0
hsa-miR-512-5p	0	0	1	0	0	0	0	0	0	0	3	0	0	0
hsa-miR-320a	0	0	0	3	0	0	0	0	0	0	0	0	1	0
hsa-miR-518a-3p	2	0	0	0	2	0	0	0	0	0	0	0	0	0
hsa-miR-630	1	0	0	0	0	0	0	0	1	0	0	0	2	0
hsa-miR-542-3p	2	0	0	2	0	0	0	0	0	0	0	0	0	0
hsa-miR-505*	0	0	1	0	3	0	0	0	0	0	0	0	0	0
hsa-miR-519e*	0	0	0	3	0	0	0	0	0	0	1	0	0	0
hsa-miR-516a-3p	1	0	0	3	0	0	0	0	0	0	0	0	0	0
hsa-miR-519c-3p	0	0	0	1	2	0	0	0	0	0	0	0	0	0
hsa-miR-30b*	0	0	0	0	0	0	0	0	2	0	0	1	0	0
hsa-miR-145	0	0	0	0	0	0	0	0	0	0	0	3	0	0
hsa-miR-367*	1	0	0	2	0	0	0	0	0	0	0	0	0	0
hsa-miR-769-3p	0	0	2	0	0	0	0	0	0	0	0	1	0	0
hsa-miR-520f	0	0	0	0	1	0	0	0	0	0	0	1	1	0
hsa-miR-300	0	0	0	0	0	0	0	0	2	0	1	0	0	0
hsa-miR-429	0	0	0	0	1	0	0	0	2	0	0	0	0	0
hsa-miR-616	0	0	0	0	0	0	0	0	0	0	0	0	3	0
hsa-miR-590-3p	0	0	0	2	1	0	0	0	0	0	0	0	0	0
hsa-miR-651	0	0	0	0	0	0	0	0	1	0	0	0	2	0
hsa-miR-1287	0	0	0	3	0	0	0	0	0	0	0	0	0	0
hsa-miR-1225-5p	0	0	0	1	2	0	0	0	0	0	0	0	0	0
hsa-miR-103-as	0	1	0	0	0	0	0	0	1	1	0	0	0	0
hsa-miR-518a-5p	0	0	0	0	0	1	0	0	0	2	0	0	0	0
hsa-miR-186*	2	0	0	0	0	0	0	1	0	0	0	0	0	0
hsa-miR-1278	0	0	0	0	0	0	0	0	2	0	1	0	0	0
hsa-miR-100	0	0	0	0	0	0	0	0	1	0	1	0	1	0
hsa-miR-500*	0	0	0	0	0	0	0	3	0	0	0	0	0	0
hsa-miR-338-5p	3	0	0	0	0	0	0	0	0	0	0	0	0	0
hsa-miR-1204	0	0	1	0	0	0	0	0	2	0	0	0	0	0
hsa-miR-27b*	0	0	0	2	1	0	0	0	0	0	0	0	0	0
hsa-miR-130a	0	0	0	0	0	1	1	0	0	0	0	0	1	0
hsa-miR-517a	0	0	0	0	1	0	0	0	1	0	0	0	1	0
hsa-miR-1299	0	0	0	1	0	0	0	0	2	0	0	0	0	0
hsa-miR-571	0	0	0	0	3	0	0	0	0	0	0	0	0	0
hsa-miR-136	0	0	1	0	1	0	0	0	1	0	0	0	0	0
hsa-miR-137	0	0	0	3	0	0	0	0	0	0	0	0	0	0
hsa-miR-1915	0	0	0	0	0	0	0	0	2	0	0	1	0	0
hsa-miR-372	0	0	0	0	0	0	0	0	3	0	0	0	0	0
hsa-miR-219-5p	0	0	2	0	1	0	0	0	0	0	0	0	0	0
hsa-miR-454*	0	0	0	0	2	0	0	0	1	0	0	0	0	0
hsa-miR-551b*	0	0	0	0	1	0	0	0	0	0	0	0	1	1
hsa-miR-222	0	0	0	0	0	0	0	0	3	0	0	0	0	0
hsa-miR-126*	0	0	3	0	0	0	0	0	0	0	0	0	0	0
hsa-miR-548k	0	0	1	0	0	0	0	0	1	0	0	0	1	0
hsa-miR-890	0	0	0	0	0	0	0	0	3	0	0	0	0	0
hsa-miR-487b	0	0	2	0	1	0	0	0	0	0	0	0	0	0
hsa-miR-223	0	0	0	1	0	0	0	0	1	0	0	1	0	0
hsa-miR-122	0	0	0	0	0	0	0	0	3	0	0	0	0	0
hsa-miR-10b	1	2	0	0	0	0	0	0	0	0	0	0	0	0
hsa-miR-519a	0	0	0	0	0	0	0	0	3	0	0	0	0	0
hsa-miR-943	2	0	0	1	0	0	0	0	0	0	0	0	0	0
hsa-miR-486-5p	0	0	0	0	0	0	0	0	0	0	1	1	1	0
hsa-miR-335	0	0	0	0	0	2	0	0	0	0	0	0	1	0
hsa-miR-16	0	0	0	0	0	0	0	0	3	0	0	0	0	0
hsa-miR-544	0	0	0	0	2	0	0	0	1	0	0	0	0	0
hsa-miR-134	0	0	0	0	0	0	0	0	3	0	0	0	0	0
hsa-miR-512-3p	0	0	0	0	0	0	0	0	3	0	0	0	0	0
hsa-miR-513a-5p	0	0	0	3	0	0	0	0	0	0	0	0	0	0
hsa-miR-22	0	0	0	0	0	0	0	0	3	0	0	0	0	0
hsa-miR-514	1	0	0	0	1	0	0	0	1	0	0	0	0	0
hsa-miR-376a	0	1	0	2	0	0	0	0	0	0	0	0	0	0
hsa-miR-30c-2*	0	0	0	0	0	0	0	0	2	0	0	0	0	0
hsa-miR-151-5p	0	0	0	0	0	2	0	0	0	0	0	0	0	0
hsa-miR-939	0	0	0	0	1	0	0	0	1	0	0	0	0	0
hsa-miR-1207-5p	0	0	0	2	0	0	0	0	0	0	0	0	0	0
hsa-miR-422a	0	0	0	0	0	0	0	0	2	0	0	0	0	0
hsa-miR-298	0	0	0	0	0	0	0	0	1	1	0	0	0	0
hsa-miR-1302	0	0	0	0	1	0	0	0	1	0	0	0	0	0
hsa-miR-1253	0	0	0	0	0	0	0	0	1	0	1	0	0	0
hsa-miR-194*	0	0	0	0	0	0	0	0	1	0	0	0	0	1
hsa-miR-543	1	0	0	0	0	0	0	0	0	0	0	0	1	0
hsa-miR-611	1	0	1	0	0	0	0	0	0	0	0	0	0	0
hsa-miR-875-5p	0	0	0	0	0	0	0	0	2	0	0	0	0	0
hsa-miR-541*	0	0	0	0	0	0	0	0	0	0	0	0	2	0
hsa-miR-770-5p	0	2	0	0	0	0	0	0	0	0	0	0	0	0
hsa-miR-1180	0	0	0	2	0	0	0	0	0	0	0	0	0	0
hsa-miR-124	0	0	0	0	0	0	0	0	0	0	2	0	0	0
hsa-miR-432	0	0	0	0	1	0	0	0	1	0	0	0	0	0
hsa-miR-378*	0	0	0	0	0	0	0	0	2	0	0	0	0	0
hsa-miR-1202	0	0	0	2	0	0	0	0	0	0	0	0	0	0
hsa-miR-412	1	0	0	0	0	0	0	0	1	0	0	0	0	0
hsa-miR-501-3p	2	0	0	0	0	0	0	0	0	0	0	0	0	0
hsa-miR-138	0	0	0	0	0	0	0	0	2	0	0	0	0	0
hsa-miR-302d	0	0	0	0	0	0	0	0	0	0	0	0	2	0
hsa-miR-1260	0	0	0	0	0	0	0	0	0	0	0	1	1	0
hsa-miR-132*	0	0	2	0	0	0	0	0	0	0	0	0	0	0
hsa-miR-886-5p	1	0	0	0	0	0	0	0	1	0	0	0	0	0
hsa-miR-409-3p	0	0	1	0	0	0	0	0	0	0	0	0	1	0
hsa-miR-30d*	1	0	0	0	0	0	0	0	1	0	0	0	0	0
hsa-miR-518c	0	0	0	0	2	0	0	0	0	0	0	0	0	0
hsa-miR-1827	0	0	0	0	1	0	0	0	0	0	0	0	1	0
hsa-miR-199a-3p	2	0	0	0	0	0	0	0	0	0	0	0	0	0
hsa-miR-576-3p	0	0	0	0	0	0	0	0	0	0	0	0	2	0
hsa-miR-200b*	0	0	0	1	1	0	0	0	0	0	0	0	0	0
hsa-miR-450b-5p	0	2	0	0	0	0	0	0	0	0	0	0	0	0
hsa-miR-641	1	0	1	0	0	0	0	0	0	0	0	0	0	0
hsa-miR-143	0	0	0	0	0	0	0	0	0	2	0	0	0	0
hsa-miR-23a	0	0	0	0	0	0	0	0	0	0	0	2	0	0
hsa-miR-562	1	0	0	0	0	0	0	0	0	0	1	0	0	0
hsa-miR-337-3p	0	0	0	2	0	0	0	0	0	0	0	0	0	0
hsa-miR-1270	0	0	0	0	2	0	0	0	0	0	0	0	0	0
hsa-miR-190	1	0	0	0	0	0	0	0	1	0	0	0	0	0
hsa-miR-1321	0	0	0	2	0	0	0	0	0	0	0	0	0	0
hsa-miR-513a-3p	1	0	0	0	1	0	0	0	0	0	0	0	0	0
hsa-miR-1282	0	0	2	0	0	0	0	0	0	0	0	0	0	0
hsa-miR-485-3p	0	0	0	0	0	0	0	0	0	0	0	0	2	0
hsa-miR-204	0	0	0	0	0	0	0	0	1	0	0	0	1	0
hsa-miR-1914	1	0	0	0	1	0	0	0	0	0	0	0	0	0
hsa-miR-520b	0	0	0	0	0	0	0	0	1	0	0	0	1	0
hsa-miR-200c	1	1	0	0	0	0	0	0	0	0	0	0	0	0
hsa-miR-488	0	0	0	0	0	0	0	0	0	0	0	0	2	0
hsa-miR-193a-3p	0	0	0	0	0	0	0	0	1	0	1	0	0	0
hsa-miR-1226	0	0	0	0	2	0	0	0	0	0	0	0	0	0
hsa-miR-411*	0	0	0	0	0	0	0	0	2	0	0	0	0	0
hsa-miR-744*	1	0	0	0	0	0	0	0	1	0	0	0	0	0
hsa-miR-578	0	0	0	0	0	0	0	0	0	0	0	2	0	0
hsa-miR-147b	1	0	0	0	1	0	0	0	0	0	0	0	0	0
hsa-miR-549	0	0	0	0	0	0	0	0	0	0	2	0	0	0
hsa-miR-548b-5p	2	0	0	0	0	0	0	0	0	0	0	0	0	0
hsa-miR-586	0	0	2	0	0	0	0	0	0	0	0	0	0	0
hsa-miR-548d-5p	0	0	1	0	0	0	0	0	0	0	0	1	0	0
hsa-miR-452	0	0	0	0	0	0	0	0	0	0	0	0	0	1
hsa-miR-507	0	0	0	0	0	0	0	0	0	0	0	0	1	0
hsa-miR-525-3p	0	0	0	0	1	0	0	0	0	0	0	0	0	0
hsa-miR-23a*	0	0	0	0	0	0	0	0	1	0	0	0	0	0
hsa-miR-15a*	0	0	0	1	0	0	0	0	0	0	0	0	0	0
hsa-miR-1182	0	0	0	0	0	0	0	0	1	0	0	0	0	0
hsa-miR-1248	0	0	0	0	0	0	0	0	1	0	0	0	0	0
hsa-miR-619	0	0	1	0	0	0	0	0	0	0	0	0	0	0
hsa-miR-506	0	0	1	0	0	0	0	0	0	0	0	0	0	0
hsa-miR-29b-1*	0	0	0	0	0	0	0	0	0	0	0	1	0	0
hsa-miR-937	1	0	0	0	0	0	0	0	0	0	0	0	0	0
hsa-miR-199b-5p	0	0	0	0	0	0	0	0	1	0	0	0	0	0
hsa-miR-554	1	0	0	0	0	0	0	0	0	0	0	0	0	0
hsa-miR-92a-1*	0	0	0	0	0	0	0	0	1	0	0	0	0	0
hsa-miR-337-5p	0	0	0	0	0	0	0	0	0	0	1	0	0	0
hsa-miR-518c*	0	0	0	0	0	0	0	0	0	0	0	0	1	0
hsa-miR-520g	0	0	0	0	0	0	0	0	0	0	1	0	0	0
hsa-miR-182	0	0	0	0	0	0	0	0	1	0	0	0	0	0
hsa-miR-1825	0	0	0	0	0	0	0	0	0	0	0	0	1	0
hsa-miR-101*	0	0	0	0	0	0	0	0	1	0	0	0	0	0
hsa-miR-876-3p	0	0	1	0	0	0	0	0	0	0	0	0	0	0
hsa-miR-346	0	0	0	0	0	0	0	0	0	0	1	0	0	0
hsa-miR-376b	0	1	0	0	0	0	0	0	0	0	0	0	0	0
hsa-let-7b*	0	0	0	0	0	0	0	0	1	0	0	0	0	0
hsa-miR-574-3p	0	0	0	0	0	0	0	0	0	0	0	0	1	0
hsa-miR-887	0	0	0	0	1	0	0	0	0	0	0	0	0	0
hsa-miR-1290	0	0	0	0	0	0	0	0	1	0	0	0	0	0
hsa-miR-592	0	0	0	0	0	0	0	0	1	0	0	0	0	0
hsa-miR-620	0	0	0	0	0	0	0	0	1	0	0	0	0	0
hsa-miR-885-5p	1	0	0	0	0	0	0	0	0	0	0	0	0	0
hsa-miR-548m	0	0	1	0	0	0	0	0	0	0	0	0	0	0
hsa-miR-27a*	0	0	0	0	0	0	0	0	1	0	0	0	0	0
hsa-miR-876-5p	1	0	0	0	0	0	0	0	0	0	0	0	0	0
hsa-miR-569	0	0	0	0	0	0	0	0	1	0	0	0	0	0
hsa-miR-602	0	0	0	0	1	0	0	0	0	0	0	0	0	0
hsa-miR-125b-1*	0	0	0	0	1	0	0	0	0	0	0	0	0	0
hsa-miR-581	0	0	0	0	0	0	0	0	1	0	0	0	0	0
hsa-miR-15b	0	0	0	0	0	0	1	0	0	0	0	0	0	0
hsa-miR-874	0	0	0	1	0	0	0	0	0	0	0	0	0	0
hsa-miR-610	1	0	0	0	0	0	0	0	0	0	0	0	0	0
hsa-miR-448	0	0	0	0	0	0	0	0	1	0	0	0	0	0
hsa-miR-373*	0	0	1	0	0	0	0	0	0	0	0	0	0	0
hsa-miR-302c	0	0	0	0	0	0	0	0	0	0	0	0	1	0
hsa-miR-148b*	0	0	0	0	0	0	0	0	1	0	0	0	0	0
hsa-miR-941	0	0	1	0	0	0	0	0	0	0	0	0	0	0
hsa-miR-34c-5p	0	0	1	0	0	0	0	0	0	0	0	0	0	0
hsa-miR-523*	0	0	0	0	0	0	0	1	0	0	0	0	0	0
hsa-miR-496	0	0	0	0	0	0	0	0	1	0	0	0	0	0
hsa-miR-147	0	0	0	1	0	0	0	0	0	0	0	0	0	0
hsa-miR-302a	0	0	0	0	0	0	0	0	1	0	0	0	0	0
hsa-miR-511	1	0	0	0	0	0	0	0	0	0	0	0	0	0
hsa-miR-362-3p	0	0	0	0	0	0	0	0	1	0	0	0	0	0
hsa-miR-218-2*	1	0	0	0	0	0	0	0	0	0	0	0	0	0
hsa-miR-605	0	0	0	0	0	0	0	0	1	0	0	0	0	0
hsa-miR-1228*	0	0	0	1	0	0	0	0	0	0	0	0	0	0
hsa-miR-494	0	0	1	0	0	0	0	0	0	0	0	0	0	0
hsa-miR-135b*	1	0	0	0	0	0	0	0	0	0	0	0	0	0
hsa-miR-192	0	0	0	0	0	1	0	0	0	0	0	0	0	0
hsa-miR-1	0	0	0	0	0	0	0	0	0	0	0	0	1	0
hsa-miR-587	0	0	0	0	0	0	0	0	1	0	0	0	0	0
hsa-miR-501-5p	0	0	0	0	0	0	0	0	0	0	0	0	1	0
hsa-miR-520a-3p	0	0	0	0	0	0	0	0	0	0	0	0	1	0
hsa-miR-1179	0	0	0	0	0	0	0	0	1	0	0	0	0	0
hsa-miR-1231	0	0	1	0	0	0	0	0	0	0	0	0	0	0
hsa-miR-23b*	0	0	0	0	1	0	0	0	0	0	0	0	0	0
hsa-miR-596	1	0	0	0	0	0	0	0	0	0	0	0	0	0
hsa-miR-589*	1	0	0	0	0	0	0	0	0	0	0	0	0	0
hsa-miR-708	0	0	1	0	0	0	0	0	0	0	0	0	0	0
hsa-miR-639	0	0	0	0	1	0	0	0	0	0	0	0	0	0
hsa-miR-224	0	0	0	0	1	0	0	0	0	0	0	0	0	0
hsa-miR-130b	1	0	0	0	0	0	0	0	0	0	0	0	0	0
hsa-let-7c*	0	0	0	0	1	0	0	0	0	0	0	0	0	0
hsa-miR-96	0	0	0	0	0	0	0	0	0	1	0	0	0	0
hsa-miR-938	0	0	0	0	0	0	0	0	0	0	0	0	0	1
hsa-miR-135b	0	0	0	0	0	0	0	0	0	0	0	1	0	0
hsa-miR-196a	0	0	0	0	0	0	0	0	1	0	0	0	0	0
hsa-miR-125b-2*	1	0	0	0	0	0	0	0	0	0	0	0	0	0
hsa-miR-25*	0	0	1	0	0	0	0	0	0	0	0	0	0	0
hsa-miR-593	1	0	0	0	0	0	0	0	0	0	0	0	0	0
hsa-miR-154	0	0	1	0	0	0	0	0	0	0	0	0	0	0
hsa-miR-297	0	0	0	0	0	0	0	0	1	0	0	0	0	0
hsa-miR-519e	0	0	0	0	0	0	0	0	1	0	0	0	0	0
hsa-miR-425*	0	0	0	0	0	0	0	0	0	0	1	0	0	0
hsa-miR-658	1	0	0	0	0	0	0	0	0	0	0	0	0	0
hsa-miR-548e	0	0	0	0	1	0	0	0	0	0	0	0	0	0

## Sheet: RFE
	lung cancer	multiple sclerosis	other pancreatic tumors and diseases	pancreatitis	pancreatic cancer ductal	tumor of stomach	sarcoidosis	melanoma	wilms tumor	prostate cancer	acure myocard infarction	periodontitis	ovarian cancer	copd
hsa-miR-320a	0	77	17	93	6	48	1	0	3	1	1	70	43	0
hsa-miR-550*	0	0	78	84	92	12	65	5	0	0	9	0	0	0
hsa-miR-199a-5p	80	17	0	0	0	2	27	2	84	0	52	0	1	48
hsa-miR-574-5p	76	0	0	0	32	19	2	40	0	78	0	0	55	0
hsa-miR-324-5p	61	0	0	0	0	0	43	46	69	76	0	0	3	0
hsa-miR-140-3p	0	0	6	33	2	6	7	15	6	33	0	70	96	19
hsa-miR-423-5p	13	45	0	2	0	0	0	0	99	14	31	1	31	41
hsa-miR-339-5p	0	89	0	0	1	69	2	40	0	12	0	33	0	0
hsa-miR-342-3p	10	0	0	0	0	0	0	0	100	0	0	14	97	1
hsa-miR-182	3	0	0	2	0	65	3	0	0	0	7	5	92	34
hsa-miR-1908	0	92	0	0	0	0	32	0	49	0	5	19	0	0
hsa-miR-191	1	0	0	22	0	0	1	0	0	83	32	57	0	0
hsa-miR-16	0	2	50	21	67	31	0	0	0	0	0	0	4	0
hsa-miR-296-5p	11	1	47	0	5	0	81	0	26	1	0	2	0	0
hsa-miR-23b	0	0	11	7	27	7	0	1	0	0	44	0	2	71
hsa-miR-361-5p	0	9	0	0	0	0	0	60	2	48	45	0	0	6
hsa-miR-595	3	0	13	40	28	48	15	0	0	0	5	0	14	0
hsa-miR-1913	75	3	0	0	2	11	3	4	5	54	0	0	0	7
hsa-miR-320d	3	0	46	4	15	43	29	8	0	9	2	0	0	0
hsa-miR-183*	67	0	0	0	0	9	5	6	0	38	0	0	29	0
hsa-miR-720	0	0	35	11	29	0	0	0	77	0	0	0	0	0
hsa-miR-26a	0	0	0	0	1	22	0	0	0	0	62	0	0	56
hsa-miR-101	0	19	8	5	0	78	3	7	0	0	16	2	1	0
hsa-miR-145	0	53	0	0	49	16	0	0	0	0	9	0	9	0
hsa-miR-30d	14	0	1	0	15	1	93	0	0	0	0	0	10	0
hsa-miR-675	35	0	0	9	2	0	0	0	25	7	1	0	20	29
hsa-miR-148a	4	0	10	43	13	5	0	30	0	9	0	0	8	3
hsa-miR-422a	0	0	0	0	0	0	1	8	0	0	69	5	0	40
hsa-miR-183	2	0	0	0	0	12	0	0	0	0	0	24	0	80
hsa-miR-22	0	2	14	17	0	0	0	16	0	0	0	1	67	0
hsa-miR-28-5p	0	0	2	0	0	7	0	0	0	0	72	4	23	8
hsa-miR-223	1	86	22	2	0	0	1	0	3	0	0	0	0	0
hsa-miR-130b	0	3	2	1	6	0	2	79	0	0	0	22	0	0
hsa-miR-92a	49	53	0	0	0	0	0	9	0	0	0	0	0	1
hsa-miR-363	0	3	22	20	2	0	2	7	1	0	0	48	0	6
hsa-miR-1274a	2	25	6	0	0	0	12	0	0	0	0	65	0	0
hsa-miR-608	0	0	20	79	6	0	2	0	0	0	0	0	0	0
hsa-miR-425	0	0	0	2	3	3	0	0	48	0	48	2	0	0
hsa-miR-150	0	1	0	0	0	0	2	0	99	0	0	0	3	0
hsa-miR-590-5p	0	0	0	0	65	0	1	27	0	0	0	10	0	0
hsa-miR-103	76	2	1	2	0	0	6	1	0	0	0	1	4	7
hsa-miR-107	0	0	17	35	23	9	0	0	0	0	5	0	4	0
hsa-miR-151-5p	1	0	2	33	6	0	0	3	16	6	0	0	1	20
hsa-miR-320c	2	0	0	6	0	7	61	7	0	3	0	0	0	0
hsa-miR-210	1	0	6	0	10	22	0	0	0	9	0	37	0	0
hsa-miR-142-5p	34	0	1	0	1	13	0	0	0	0	0	1	2	33
hsa-miR-194	0	0	34	3	9	0	0	0	17	1	17	0	1	0
hsa-miR-28-3p	1	1	0	1	2	5	0	0	0	0	2	2	0	67
hsa-miR-636	0	0	0	25	33	0	1	0	0	3	17	0	0	1
hsa-miR-451	2	28	0	0	0	0	30	0	1	0	1	16	0	0
hsa-miR-625*	4	0	0	0	0	3	0	0	12	28	0	0	1	30
hsa-miR-146b-5p	0	0	0	0	0	0	0	0	13	0	0	0	0	64
hsa-miR-324-3p	2	1	0	2	3	0	65	0	0	0	1	0	1	0
hsa-miR-20b	2	28	0	0	0	0	0	29	10	1	0	0	0	0
hsa-miR-374b	0	1	0	0	0	0	0	0	0	67	0	0	0	0
hsa-miR-186*	0	0	0	0	0	0	0	2	0	0	0	0	65	0
hsa-miR-362-5p	0	0	0	0	0	0	0	0	0	67	0	0	0	0
hsa-miR-320b	0	56	0	0	0	0	2	0	3	0	0	0	0	4
hsa-miR-145*	0	0	0	32	0	29	0	4	0	0	0	0	0	0
hsa-miR-1274b	0	0	1	0	0	0	3	3	35	0	1	2	7	12
hsa-miR-532-3p	1	0	0	1	0	0	0	0	0	0	21	1	1	39
hsa-miR-361-3p	0	2	0	0	0	0	5	0	0	56	0	0	0	0
hsa-miR-370	0	0	0	0	0	31	0	0	0	0	0	32	0	0
hsa-miR-574-3p	11	1	0	0	0	0	0	0	25	18	0	0	1	6
hsa-miR-103-as	6	38	0	0	0	0	1	0	0	14	2	1	0	0
hsa-let-7i	0	0	20	15	9	17	0	0	0	0	1	0	0	0
hsa-miR-187*	0	0	0	0	0	0	0	0	0	0	0	1	59	1
hsa-miR-1268	0	0	24	0	34	3	0	0	0	0	0	0	0	0
hsa-miR-129*	0	0	0	4	0	0	8	0	0	0	0	49	0	0
hsa-miR-216a	0	0	0	0	3	0	0	58	0	0	0	0	0	0
hsa-miR-22*	0	0	0	0	0	53	0	0	0	0	1	6	0	0
hsa-miR-30b	1	0	0	0	0	0	1	57	1	0	0	0	0	0
hsa-miR-99b	0	0	0	0	0	2	1	1	0	50	0	0	0	5
hsa-miR-1183	10	0	15	1	23	0	0	0	0	0	0	8	0	2
hsa-miR-486-3p	0	21	0	0	0	5	2	24	0	0	0	4	1	0
hsa-miR-378	0	0	1	55	0	0	0	0	1	0	0	0	0	0
hsa-miR-144*	0	0	0	2	0	0	0	0	3	51	0	1	0	0
hsa-miR-219-5p	0	0	57	0	0	0	0	0	0	0	0	0	0	0
hsa-miR-192	4	0	0	0	0	0	5	3	0	0	43	1	0	1
hsa-miR-744	4	0	0	1	2	0	1	0	0	0	0	47	0	0
hsa-miR-146a	0	0	9	0	33	0	0	0	8	0	0	3	2	0
hsa-let-7c	0	53	0	0	0	0	0	0	0	0	0	0	0	0
hsa-miR-638	0	0	0	0	0	0	0	0	0	0	0	16	0	36
hsa-miR-24	0	4	19	15	2	12	0	0	0	0	0	0	0	0
hsa-let-7b	0	1	16	10	14	0	0	0	0	0	5	0	5	0
hsa-miR-1915	0	0	0	3	0	0	16	0	0	0	27	4	0	1
hsa-miR-1249	0	0	8	11	7	0	0	24	0	0	0	0	0	0
hsa-miR-424	0	3	45	0	1	0	0	0	0	0	0	0	0	0
hsa-miR-212	0	0	0	0	48	1	0	0	0	0	0	0	0	0
hsa-miR-342-5p	6	0	0	0	0	0	0	0	0	0	0	8	0	35
hsa-miR-1234	0	1	21	0	3	0	3	0	0	0	0	13	0	7
hsa-miR-484	0	0	8	0	9	0	0	0	0	0	28	0	0	1
hsa-miR-186	0	0	5	0	0	0	0	41	0	0	0	0	0	0
hsa-miR-766	0	1	0	1	0	0	0	4	40	0	0	0	0	0
hsa-miR-141*	2	0	5	0	0	0	0	12	10	0	1	0	0	15
hsa-miR-155	0	0	0	0	1	0	0	0	0	0	0	0	44	0
hsa-miR-362-3p	0	0	0	0	0	0	43	0	0	0	0	0	0	0
hsa-miR-885-3p	0	5	0	0	0	0	0	0	36	2	0	0	0	0
hsa-miR-664	0	0	0	0	0	0	0	0	0	1	40	2	0	0
hsa-miR-198	0	0	3	25	13	0	0	0	0	0	0	2	0	0
hsa-miR-767-5p	0	0	40	2	0	0	0	0	0	0	0	0	0	0
hsa-miR-1208	0	0	0	0	1	0	0	35	0	0	0	6	0	0
hsa-miR-556-5p	0	0	0	23	0	0	1	15	0	0	0	0	2	0
hsa-miR-600	35	0	0	0	0	0	0	0	0	4	1	0	0	0
hsa-miR-200a	0	0	15	19	2	0	0	1	0	1	2	0	0	0
hsa-miR-148b*	0	0	0	0	0	40	0	0	0	0	0	0	0	0
hsa-miR-1278	0	0	0	16	0	0	0	0	0	0	0	0	23	0
hsa-miR-502-3p	19	5	0	0	0	0	14	0	0	0	0	1	0	0
hsa-miR-663	0	1	0	0	0	0	0	0	0	0	0	37	0	0
hsa-miR-144	1	0	0	0	0	0	34	0	2	0	0	0	0	0
hsa-miR-199b-3p	0	17	0	0	12	5	0	0	0	0	0	0	3	0
hsa-miR-29b	0	0	1	0	1	0	3	0	0	0	0	30	2	0
hsa-miR-155*	35	0	1	0	0	0	0	0	0	0	0	0	0	0
hsa-miR-411	28	0	0	0	8	0	0	0	0	0	0	0	0	0
hsa-miR-197	0	0	1	14	0	0	9	0	11	0	0	0	0	1
hsa-miR-125a-5p	2	0	1	0	0	0	2	0	0	28	0	0	0	3
hsa-miR-19b	18	0	0	0	0	0	1	2	0	0	0	13	0	1
hsa-miR-659	0	0	0	2	0	32	0	0	0	0	0	0	0	0
hsa-miR-1243	0	33	0	0	0	0	0	0	0	0	0	0	0	0
hsa-miR-580	0	0	0	26	0	1	3	0	0	0	0	0	2	0
hsa-miR-455-3p	0	0	0	0	0	0	0	17	0	0	14	0	0	0
hsa-miR-625	0	0	0	0	0	25	0	1	0	4	0	0	0	0
hsa-miR-96	0	0	0	0	0	5	0	7	4	0	0	1	1	12
hsa-miR-208b	0	23	0	0	0	0	6	0	0	0	0	0	0	0
hsa-miR-19a	0	0	0	8	0	6	0	0	0	0	15	0	0	0
hsa-miR-106b	0	0	0	0	22	6	0	0	0	0	0	0	0	0
hsa-miR-1290	0	0	0	0	0	0	0	0	0	0	27	0	0	0
hsa-let-7e	0	0	0	3	0	1	0	14	0	1	0	0	0	8
hsa-miR-1298	0	0	24	0	2	0	0	0	0	0	0	0	0	0
hsa-miR-101*	0	0	0	0	0	25	0	0	0	0	0	0	0	0
hsa-miR-542-5p	0	1	0	2	0	4	0	18	0	0	0	0	0	0
hsa-miR-92b	0	0	5	8	0	0	11	0	0	0	0	0	0	0
hsa-miR-185	10	0	3	1	2	0	0	0	0	0	6	0	2	0
hsa-miR-1469	0	0	0	0	0	0	0	0	16	0	0	7	0	0
hsa-miR-25	3	0	0	0	0	2	6	0	0	0	0	0	11	1
hsa-miR-1302	0	0	0	0	0	0	0	0	0	0	22	0	0	0
hsa-miR-339-3p	0	0	0	0	0	0	0	6	10	0	0	6	0	0
hsa-miR-100	0	2	0	0	6	1	1	0	0	0	0	1	0	11
hsa-miR-137	0	0	16	1	0	0	0	0	0	5	0	0	0	0
hsa-miR-628-3p	0	1	0	9	0	0	0	0	0	0	6	0	4	0
hsa-miR-497*	0	0	0	0	0	0	20	0	0	0	0	0	0	0
hsa-miR-501-3p	0	0	0	0	0	0	0	13	0	0	0	0	0	7
hsa-miR-874	0	0	0	0	13	0	0	0	0	0	3	2	2	0
hsa-miR-423-3p	7	0	0	0	1	0	0	2	2	0	7	0	1	0
hsa-miR-521	0	0	0	0	0	0	19	0	0	0	1	0	0	0
hsa-miR-143	4	0	0	0	0	0	0	0	0	0	11	0	0	4
hsa-miR-222	0	0	0	0	0	0	0	0	0	0	19	0	0	0
hsa-miR-1231	0	0	0	0	1	0	18	0	0	0	0	0	0	0
hsa-miR-505*	0	0	0	0	0	0	0	0	0	19	0	0	0	0
hsa-miR-532-5p	1	1	4	0	5	4	3	0	0	0	0	0	0	0
hsa-miR-671-5p	0	18	0	0	0	0	0	0	0	0	0	0	0	0
hsa-miR-499-3p	0	0	16	0	2	0	0	0	0	0	0	0	0	0
hsa-miR-1181	0	0	0	0	0	5	0	2	0	0	0	11	0	0
hsa-miR-195*	11	0	0	0	0	0	7	0	0	0	0	0	0	0
hsa-miR-192*	0	0	0	0	0	0	1	3	0	0	14	0	0	0
hsa-miR-1470	1	0	0	0	0	1	0	3	0	0	1	11	0	0
hsa-miR-891b	0	0	5	0	0	0	0	4	0	0	0	8	0	0
hsa-miR-15b	0	0	0	0	0	0	17	0	0	0	0	0	0	0
hsa-miR-29c	0	0	0	0	0	1	7	4	0	0	0	0	0	5
hsa-miR-17	0	0	6	2	0	0	8	0	0	0	0	0	1	0
hsa-miR-149*	1	0	3	1	2	0	0	0	0	0	0	0	0	10
hsa-miR-519b-5p	0	0	0	1	0	0	0	0	0	0	0	8	0	7
hsa-miR-1225-5p	16	0	0	0	0	0	0	0	0	0	0	0	0	0
hsa-miR-518b	0	0	0	0	0	0	0	0	0	0	0	12	0	4
hsa-miR-551b*	0	0	0	0	0	0	16	0	0	0	0	0	0	0
hsa-miR-151-3p	4	0	0	0	0	0	9	0	2	1	0	0	0	0
hsa-miR-518e*	0	0	12	0	0	0	0	0	0	0	0	4	0	0
hsa-miR-7-1*	0	0	0	0	0	0	16	0	0	0	0	0	0	0
hsa-miR-16-2*	10	0	0	0	0	0	0	2	1	0	1	0	2	0
hsa-miR-9*	0	0	0	0	0	0	0	0	0	0	0	15	0	0
hsa-miR-1251	0	0	0	0	0	0	0	15	0	0	0	0	0	0
hsa-miR-122	0	0	0	0	15	0	0	0	0	0	0	0	0	0
hsa-miR-1296	0	0	0	0	0	0	0	0	0	0	15	0	0	0
hsa-miR-335	0	0	0	0	0	9	0	0	0	1	0	0	0	5
hsa-miR-26b	1	0	12	0	0	2	0	0	0	0	0	0	0	0
hsa-miR-516b*	0	0	0	0	15	0	0	0	0	0	0	0	0	0
hsa-miR-635	0	1	0	0	0	0	0	12	0	0	0	0	1	0
hsa-miR-548f	0	0	0	3	0	5	0	0	0	0	0	0	0	6
hsa-miR-181a	0	0	0	0	8	0	0	0	0	0	6	0	0	0
hsa-miR-891a	0	0	0	0	0	0	0	0	0	0	0	0	14	0
hsa-miR-223*	0	0	0	1	10	0	0	0	0	0	0	3	0	0
hsa-miR-452*	0	0	0	0	0	0	0	13	0	0	0	0	0	0
hsa-miR-634	0	0	0	0	0	3	0	0	0	0	4	6	0	0
hsa-miR-188-5p	1	0	0	0	0	7	0	3	0	1	0	0	0	1
hsa-miR-545	0	0	0	0	0	0	0	13	0	0	0	0	0	0
hsa-miR-20a	10	1	0	0	0	0	0	1	0	1	0	0	0	0
hsa-miR-374a	0	0	1	0	3	0	0	0	0	7	0	1	1	0
hsa-miR-554	0	0	0	0	0	1	0	0	0	1	5	2	0	3
hsa-miR-1252	0	0	12	0	0	0	0	0	0	0	0	0	0	0
hsa-miR-1247	0	0	0	0	0	0	0	0	0	12	0	0	0	0
hsa-miR-199a-3p	0	0	0	1	0	0	4	6	0	0	0	0	1	0
hsa-miR-494	0	0	0	0	0	0	0	0	0	0	0	0	12	0
hsa-miR-1283	0	0	0	0	0	0	0	0	0	0	12	0	0	0
hsa-miR-1207-5p	0	0	0	0	10	0	0	0	0	0	0	0	0	1
hsa-miR-431	0	0	0	0	0	0	0	11	0	0	0	0	0	0
hsa-let-7a	0	0	7	0	2	0	0	0	0	0	2	0	0	0
hsa-miR-216b	0	0	0	0	2	1	0	7	0	0	0	0	0	1
hsa-miR-92b*	3	1	0	0	0	3	0	0	0	1	0	2	0	1
hsa-miR-518d-5p	0	0	11	0	0	0	0	0	0	0	0	0	0	0
hsa-miR-1250	0	0	11	0	0	0	0	0	0	0	0	0	0	0
hsa-miR-920	0	0	0	0	1	0	0	0	0	0	10	0	0	0
hsa-miR-147	0	0	0	0	10	0	0	0	0	0	1	0	0	0
hsa-miR-214	0	0	0	0	11	0	0	0	0	0	0	0	0	0
hsa-miR-328	0	0	0	0	0	2	0	0	0	1	0	0	8	0
hsa-miR-548d-3p	11	0	0	0	0	0	0	0	0	0	0	0	0	0
hsa-miR-138-1*	0	0	0	0	0	0	0	0	0	0	0	11	0	0
hsa-miR-873	0	0	6	0	0	0	0	5	0	0	0	0	0	0
hsa-miR-491-3p	0	0	0	0	0	0	10	0	0	0	1	0	0	0
hsa-miR-425*	0	0	0	4	0	0	1	0	0	0	6	0	0	0
hsa-miR-331-5p	0	0	0	10	0	0	0	0	0	0	0	0	0	0
hsa-miR-500	2	0	0	0	1	0	1	2	2	2	0	0	0	0
hsa-miR-93*	0	6	0	0	0	0	0	0	1	0	3	0	0	0
hsa-miR-143*	0	0	0	0	0	0	0	0	0	0	10	0	0	0
hsa-miR-184	8	0	0	0	0	0	0	0	0	0	0	2	0	0
hsa-miR-205	0	0	1	0	0	0	0	0	4	0	0	0	0	5
hsa-miR-518a-3p	0	0	0	0	0	0	0	0	0	0	0	0	10	0
hsa-miR-30e	10	0	0	0	0	0	0	0	0	0	0	0	0	0
hsa-miR-27b	0	1	2	2	1	0	1	3	0	0	0	0	0	0
hsa-miR-1229	0	1	0	0	0	0	0	0	0	0	5	0	4	0
hsa-miR-604	0	0	0	0	0	0	0	0	0	0	0	9	0	0
hsa-miR-182*	2	0	0	7	0	0	0	0	0	0	0	0	0	0
hsa-miR-15a	0	9	0	0	0	0	0	0	0	0	0	0	0	0
hsa-miR-215	0	0	0	0	0	0	5	0	4	0	0	0	0	0
hsa-miR-548o	0	0	0	0	0	0	0	5	0	0	0	0	0	4
hsa-miR-30a	0	0	0	0	0	0	0	0	0	1	0	0	0	8
hsa-miR-325	0	0	2	0	0	0	0	0	0	0	2	4	0	1
hsa-miR-331-3p	0	0	0	4	1	0	1	2	0	0	0	1	0	0
hsa-miR-486-5p	5	0	0	0	3	0	0	0	1	0	0	0	0	0
hsa-miR-105	0	0	0	0	0	9	0	0	0	0	0	0	0	0
hsa-miR-627	0	0	9	0	0	0	0	0	0	0	0	0	0	0
hsa-miR-892a	0	0	0	0	0	0	0	9	0	0	0	0	0	0
hsa-miR-658	0	0	0	0	0	9	0	0	0	0	0	0	0	0
hsa-miR-154*	0	0	0	0	0	0	0	0	0	8	0	0	0	0
hsa-miR-383	0	0	0	0	0	0	0	0	0	3	1	0	4	0
hsa-miR-127-3p	0	0	0	0	0	1	0	7	0	0	0	0	0	0
hsa-miR-1264	0	0	0	0	0	0	0	0	0	8	0	0	0	0
hsa-miR-409-3p	8	0	0	0	0	0	0	0	0	0	0	0	0	0
hsa-miR-100*	0	0	0	5	0	0	0	0	0	0	3	0	0	0
hsa-miR-208a	0	0	0	0	0	0	0	0	0	0	0	0	0	8
hsa-miR-128	0	0	0	0	1	0	0	0	0	0	2	5	0	0
hsa-miR-562	0	7	0	0	0	0	0	0	0	0	0	0	1	0
hsa-miR-369-3p	0	0	0	0	0	0	0	0	0	8	0	0	0	0
hsa-miR-889	0	0	0	0	0	0	0	0	0	0	0	0	8	0
hsa-miR-142-3p	4	0	0	0	0	4	0	0	0	0	0	0	0	0
hsa-miR-193a-3p	0	0	0	0	2	1	0	3	1	0	1	0	0	0
hsa-miR-492	0	0	0	0	0	0	0	0	0	0	0	0	0	8
hsa-miR-518d-3p	0	0	0	7	0	0	0	0	0	0	0	0	0	0
hsa-miR-1224-3p	0	0	0	0	0	0	0	0	0	0	0	0	7	0
hsa-miR-30c-1*	0	0	0	1	0	3	0	0	0	0	0	0	0	3
hsa-miR-29a	1	0	3	0	0	0	0	0	0	0	3	0	0	0
hsa-miR-508-5p	2	0	0	0	0	0	0	3	0	0	0	0	0	2
hsa-miR-181c	0	0	0	0	3	0	2	2	0	0	0	0	0	0
hsa-miR-935	0	0	0	0	4	3	0	0	0	0	0	0	0	0
hsa-miR-588	0	0	0	0	0	0	0	0	0	0	7	0	0	0
hsa-miR-30e*	0	0	0	0	0	0	3	4	0	0	0	0	0	0
hsa-miR-132*	0	0	1	0	4	0	0	2	0	0	0	0	0	0
hsa-miR-648	0	7	0	0	0	0	0	0	0	0	0	0	0	0
hsa-miR-511	0	0	0	0	7	0	0	0	0	0	0	0	0	0
hsa-miR-23a	0	0	0	0	0	0	0	0	0	0	1	0	0	6
hsa-miR-19b-1*	3	0	0	0	0	0	0	0	0	0	0	4	0	0
hsa-miR-135b*	0	0	0	0	0	0	0	0	0	0	0	0	0	7
hsa-miR-454	0	5	1	0	1	0	0	0	0	0	0	0	0	0
hsa-miR-18a*	6	0	0	0	0	0	1	0	0	0	0	0	0	0
hsa-miR-1305	0	0	3	0	0	0	0	3	0	1	0	0	0	0
hsa-miR-519e*	0	0	0	0	0	0	0	0	0	0	1	6	0	0
hsa-miR-548e	0	0	0	0	0	0	6	0	0	0	0	0	1	0
hsa-miR-27a	0	0	0	0	0	1	0	0	1	0	1	3	0	0
hsa-miR-497	0	0	0	0	0	0	0	0	0	0	0	6	0	0
hsa-miR-1281	0	0	0	0	0	0	0	0	0	6	0	0	0	0
hsa-miR-1253	4	0	0	0	0	2	0	0	0	0	0	0	0	0
hsa-miR-32*	0	0	0	0	0	0	0	0	0	0	0	0	6	0
hsa-miR-450b-5p	0	0	0	0	0	0	0	0	0	0	0	0	6	0
hsa-miR-376c	0	0	4	0	0	0	0	0	0	0	0	2	0	0
hsa-miR-200b	0	0	1	1	0	0	1	0	0	3	0	0	0	0
hsa-miR-660	3	0	0	0	0	0	2	0	0	0	0	0	0	1
hsa-miR-200c	0	6	0	0	0	0	0	0	0	0	0	0	0	0
hsa-miR-1288	0	0	0	0	0	0	0	0	0	0	0	0	6	0
hsa-miR-1225-3p	0	6	0	0	0	0	0	0	0	0	0	0	0	0
hsa-miR-1280	0	0	0	0	1	4	1	0	0	0	0	0	0	0
hsa-miR-663b	0	1	0	0	0	0	0	4	0	0	0	0	0	0
hsa-miR-340	0	0	0	0	0	0	0	0	0	3	0	0	0	2
hsa-miR-541	0	0	0	0	0	0	0	4	0	0	1	0	0	0
hsa-miR-30c	0	0	2	0	0	0	0	0	0	0	0	0	3	0
hsa-miR-611	0	0	0	0	0	0	0	0	0	0	0	0	5	0
hsa-miR-602	0	0	0	0	0	0	0	0	4	0	0	0	1	0
hsa-let-7d	0	0	0	0	1	0	1	0	0	0	0	2	0	1
hsa-miR-181a*	3	0	0	0	0	0	0	1	0	1	0	0	0	0
hsa-miR-647	0	0	0	0	5	0	0	0	0	0	0	0	0	0
hsa-miR-555	0	0	3	1	1	0	0	0	0	0	0	0	0	0
hsa-miR-1909	0	0	0	0	5	0	0	0	0	0	0	0	0	0
hsa-miR-624*	5	0	0	0	0	0	0	0	0	0	0	0	0	0
hsa-miR-490-5p	0	0	5	0	0	0	0	0	0	0	0	0	0	0
hsa-miR-302c*	0	5	0	0	0	0	0	0	0	0	0	0	0	0
hsa-miR-195	1	0	0	0	0	0	4	0	0	0	0	0	0	0
hsa-miR-1200	0	1	0	0	0	0	0	2	0	2	0	0	0	0
hsa-miR-512-3p	5	0	0	0	0	0	0	0	0	0	0	0	0	0
hsa-miR-802	0	0	0	0	0	0	0	0	0	3	0	1	0	0
hsa-miR-1228	0	0	1	0	0	0	1	2	0	0	0	0	0	0
hsa-miR-126	0	0	0	0	0	0	2	0	0	0	0	2	0	0
hsa-miR-1538	0	0	0	0	0	0	2	0	2	0	0	0	0	0
hsa-miR-323-3p	0	0	0	4	0	0	0	0	0	0	0	0	0	0
hsa-miR-622	0	0	0	0	0	0	0	0	0	0	0	4	0	0
hsa-miR-1226*	0	1	0	0	0	0	0	3	0	0	0	0	0	0
hsa-miR-1259	0	0	0	0	0	0	0	0	0	0	0	0	4	0
hsa-miR-220c	0	0	0	1	3	0	0	0	0	0	0	0	0	0
hsa-miR-1826	0	0	0	1	0	0	0	3	0	0	0	0	0	0
hsa-miR-99a	0	0	0	0	0	0	0	1	0	0	0	3	0	0
hsa-miR-1284	0	0	0	0	0	0	0	0	0	0	0	0	4	0
hsa-miR-620	0	0	0	4	0	0	0	0	0	0	0	0	0	0
hsa-miR-877*	0	0	0	0	0	0	0	0	0	4	0	0	0	0
hsa-miR-487a	0	1	0	1	2	0	0	0	0	0	0	0	0	0
hsa-miR-513b	0	0	4	0	0	0	0	0	0	0	0	0	0	0
hsa-miR-99a*	0	0	0	0	2	0	0	0	0	0	2	0	0	0
hsa-miR-641	0	0	0	0	0	0	0	0	0	0	0	4	0	0
hsa-miR-149	0	0	0	0	0	0	0	0	0	4	0	0	0	0
hsa-miR-138-2*	0	0	0	0	0	0	0	0	0	0	2	2	0	0
hsa-miR-371-3p	0	0	1	0	0	3	0	0	0	0	0	0	0	0
hsa-miR-1228*	0	0	0	0	0	0	0	0	0	0	0	4	0	0
hsa-miR-584	0	0	0	0	0	0	0	0	0	1	0	3	0	0
hsa-miR-218-1*	0	0	0	0	1	0	0	0	2	0	1	0	0	0
hsa-miR-1289	0	0	0	0	0	0	0	0	0	0	0	4	0	0
hsa-miR-133a	0	0	0	0	4	0	0	0	0	0	0	0	0	0
hsa-miR-10a	0	0	0	0	0	0	0	0	0	0	0	0	4	0
hsa-miR-606	0	0	0	0	0	0	0	0	3	1	0	0	0	0
hsa-miR-1539	2	0	0	0	0	1	0	0	0	0	0	0	0	0
hsa-miR-29a*	0	0	1	0	0	0	0	0	0	0	2	0	0	0
hsa-miR-1910	0	0	0	0	0	3	0	0	0	0	0	0	0	0
hsa-miR-1273	0	0	3	0	0	0	0	0	0	0	0	0	0	0
hsa-miR-582-3p	0	0	0	0	0	0	0	2	0	1	0	0	0	0
hsa-miR-550	0	3	0	0	0	0	0	0	0	0	0	0	0	0
hsa-miR-432*	0	0	0	0	0	3	0	0	0	0	0	0	0	0
hsa-miR-1180	2	0	0	0	0	0	0	0	0	0	0	0	1	0
hsa-miR-378*	0	0	0	0	0	2	0	0	0	0	0	0	0	1
hsa-miR-193a-5p	0	0	0	0	0	3	0	0	0	0	0	0	0	0
hsa-miR-1260	0	0	0	0	0	0	2	0	0	0	1	0	0	0
hsa-miR-886-5p	0	0	0	2	0	1	0	0	0	0	0	0	0	0
hsa-miR-98	0	0	0	0	3	0	0	0	0	0	0	0	0	0
hsa-miR-130a	0	1	0	0	0	0	2	0	0	0	0	0	0	0
hsa-let-7f	0	0	0	0	0	0	0	0	0	3	0	0	0	0
hsa-miR-202*	0	0	1	2	0	0	0	0	0	0	0	0	0	0
hsa-miR-551a	0	0	0	1	2	0	0	0	0	0	0	0	0	0
hsa-miR-221*	0	2	0	0	0	0	0	0	0	1	0	0	0	0
hsa-miR-656	0	0	0	0	0	0	3	0	0	0	0	0	0	0
hsa-miR-148b	2	0	0	0	0	0	1	0	0	0	0	0	0	0
hsa-miR-337-3p	0	0	0	0	0	0	0	0	0	0	0	0	0	3
hsa-miR-146a*	0	0	0	3	0	0	0	0	0	0	0	0	0	0
hsa-miR-515-3p	0	0	0	0	0	3	0	0	0	0	0	0	0	0
hsa-miR-527	0	0	0	0	0	0	0	0	0	0	0	3	0	0
hsa-miR-450b-3p	0	0	0	0	1	0	0	0	0	0	0	0	2	0
hsa-miR-1286	0	0	0	0	0	2	1	0	0	0	0	0	0	0
hsa-miR-301a	0	0	0	0	0	0	0	0	0	0	0	0	3	0
hsa-miR-1301	0	0	0	0	0	0	0	3	0	0	0	0	0	0
hsa-miR-1256	0	0	0	0	0	0	0	0	0	3	0	0	0	0
hsa-miR-139-3p	0	0	0	0	0	0	0	0	0	0	0	3	0	0
hsa-miR-524-3p	0	0	0	0	0	0	0	0	0	0	0	1	1	0
hsa-miR-655	0	0	0	0	1	0	0	0	0	0	0	0	0	1
hsa-miR-140-5p	0	0	0	0	0	2	0	0	0	0	0	0	0	0
hsa-miR-629*	0	0	0	0	0	0	1	0	0	0	0	1	0	0
hsa-miR-1255a	0	0	0	2	0	0	0	0	0	0	0	0	0	0
hsa-miR-519b-3p	0	0	0	0	2	0	0	0	0	0	0	0	0	0
hsa-miR-219-1-3p	0	0	2	0	0	0	0	0	0	0	0	0	0	0
hsa-miR-125b	0	0	0	0	0	0	2	0	0	0	0	0	0	0
hsa-miR-937	0	0	0	2	0	0	0	0	0	0	0	0	0	0
hsa-miR-520g	0	0	0	0	0	0	0	1	0	0	1	0	0	0
hsa-miR-483-3p	0	0	0	0	0	0	0	0	0	2	0	0	0	0
hsa-miR-1254	0	0	0	0	0	0	0	0	0	0	0	0	2	0
hsa-miR-526a	0	0	0	0	0	0	0	2	0	0	0	0	0	0
hsa-miR-124	0	0	0	0	0	0	0	0	0	0	0	0	0	2
hsa-miR-570	0	0	0	0	0	0	1	0	0	0	0	0	0	1
hsa-miR-1269	0	0	0	0	0	0	0	0	0	0	2	0	0	0
hsa-miR-650	0	0	0	0	0	0	0	0	0	0	0	2	0	0
hsa-miR-1295	0	0	0	0	0	0	2	0	0	0	0	0	0	0
hsa-miR-220b	0	0	2	0	0	0	0	0	0	0	0	0	0	0
hsa-miR-559	0	1	0	0	0	1	0	0	0	0	0	0	0	0
hsa-miR-18b*	1	0	0	0	1	0	0	0	0	0	0	0	0	0
hsa-miR-610	0	0	0	0	0	0	1	0	0	0	0	0	1	0
hsa-miR-518c	0	0	0	0	0	0	0	0	0	0	0	0	2	0
hsa-miR-33b*	0	0	0	0	0	0	0	0	0	0	0	0	0	2
hsa-miR-1308	0	0	0	0	0	0	0	0	0	0	0	0	0	2
hsa-miR-21	0	0	0	0	0	1	0	0	0	0	0	0	1	0
hsa-miR-517*	1	0	0	0	0	0	0	1	0	0	0	0	0	0
hsa-miR-1293	0	0	2	0	0	0	0	0	0	0	0	0	0	0
hsa-miR-1197	0	0	0	0	1	0	0	0	0	0	1	0	0	0
hsa-miR-498	0	0	0	2	0	0	0	0	0	0	0	0	0	0
hsa-miR-644	0	0	0	0	0	2	0	0	0	0	0	0	0	0
hsa-miR-566	0	0	0	1	0	0	0	0	0	0	0	0	0	1
hsa-miR-921	0	0	0	0	0	2	0	0	0	0	0	0	0	0
hsa-miR-708	0	0	0	0	0	0	1	0	0	1	0	0	0	0
hsa-miR-214*	2	0	0	0	0	0	0	0	0	0	0	0	0	0
hsa-miR-936	0	0	0	0	2	0	0	0	0	0	0	0	0	0
hsa-miR-1226	0	0	0	0	0	0	0	0	0	0	2	0	0	0
hsa-miR-134	0	0	0	0	0	0	0	0	0	0	0	0	2	0
hsa-miR-548b-3p	0	0	0	0	0	0	0	0	0	0	0	0	1	1
hsa-miR-203	0	0	0	0	0	0	0	0	0	0	0	2	0	0
hsa-miR-1272	0	0	0	0	0	0	1	0	0	0	0	1	0	0
hsa-miR-124*	0	0	0	0	0	0	2	0	0	0	0	0	0	0
hsa-miR-1275	0	1	0	0	0	1	0	0	0	0	0	0	0	0
hsa-miR-181a-2*	0	2	0	0	0	0	0	0	0	0	0	0	0	0
hsa-miR-491-5p	0	0	0	0	0	2	0	0	0	0	0	0	0	0
hsa-miR-708*	0	0	0	2	0	0	0	0	0	0	0	0	0	0
hsa-miR-1323	0	0	0	0	0	0	0	0	0	0	0	0	2	0
hsa-miR-514	0	0	0	2	0	0	0	0	0	0	0	0	0	0
hsa-miR-561	0	0	0	0	0	0	1	0	0	0	0	0	0	0
hsa-miR-615-5p	0	0	0	0	0	0	0	1	0	0	0	0	0	0
hsa-miR-525-3p	0	0	0	0	0	0	0	1	0	0	0	0	0	0
hsa-miR-20b*	0	0	0	0	0	1	0	0	0	0	0	0	0	0
hsa-miR-136*	1	0	0	0	0	0	0	0	0	0	0	0	0	0
hsa-miR-384	0	0	0	0	1	0	0	0	0	0	0	0	0	0
hsa-miR-1227	0	0	0	0	1	0	0	0	0	0	0	0	0	0
hsa-miR-1182	0	0	1	0	0	0	0	0	0	0	0	0	0	0
hsa-miR-18b	0	0	0	0	0	0	0	0	0	0	0	1	0	0
hsa-miR-148a*	1	0	0	0	0	0	0	0	0	0	0	0	0	0
hsa-miR-519c-5p	0	0	0	1	0	0	0	0	0	0	0	0	0	0
hsa-miR-300	0	0	0	0	1	0	0	0	0	0	0	0	0	0
hsa-miR-1304	0	0	0	0	0	0	0	0	0	0	1	0	0	0
hsa-miR-132	0	0	0	0	0	0	1	0	0	0	0	0	0	0
hsa-miR-1914*	0	0	0	0	0	0	0	1	0	0	0	0	0	0
hsa-miR-543	0	0	0	0	0	0	0	0	0	0	0	0	1	0
hsa-miR-657	0	0	0	0	0	1	0	0	0	0	0	0	0	0
hsa-miR-371-5p	0	0	0	0	1	0	0	0	0	0	0	0	0	0
hsa-miR-1263	0	1	0	0	0	0	0	0	0	0	0	0	0	0
hsa-miR-374b*	0	0	0	0	1	0	0	0	0	0	0	0	0	0
hsa-miR-769-5p	1	0	0	0	0	0	0	0	0	0	0	0	0	0
hsa-miR-548c-3p	0	0	0	0	0	0	1	0	0	0	0	0	0	0
hsa-miR-592	1	0	0	0	0	0	0	0	0	0	0	0	0	0
hsa-miR-1911*	0	0	0	0	0	0	0	0	0	0	0	1	0	0
hsa-miR-877	0	0	0	0	0	1	0	0	0	0	0	0	0	0
hsa-miR-875-3p	0	0	0	0	1	0	0	0	0	0	0	0	0	0
hsa-miR-450a	0	0	0	1	0	0	0	0	0	0	0	0	0	0
hsa-miR-1303	0	0	0	0	0	0	0	0	0	0	1	0	0	0
hsa-miR-876-5p	0	0	1	0	0	0	0	0	0	0	0	0	0	0
hsa-miR-18a	0	0	0	0	0	0	0	1	0	0	0	0	0	0
hsa-miR-643	0	0	0	0	0	0	0	0	0	0	0	0	1	0
hsa-miR-130a*	0	0	0	0	0	0	0	0	0	0	0	0	1	0
hsa-miR-597	0	0	0	0	1	0	0	0	0	0	0	0	0	0
hsa-miR-924	0	0	0	0	0	0	0	0	0	0	1	0	0	0
hsa-miR-448	1	0	0	0	0	0	0	0	0	0	0	0	0	0
hsa-miR-377	0	0	0	0	1	0	0	0	0	0	0	0	0	0
hsa-miR-520h	0	0	0	0	0	0	0	0	0	0	1	0	0	0
hsa-miR-617	0	0	0	0	0	0	1	0	0	0	0	0	0	0
hsa-miR-523*	0	0	0	0	0	0	0	0	0	1	0	0	0	0
hsa-miR-496	0	0	0	1	0	0	0	0	0	0	0	0	0	0
hsa-miR-200c*	0	0	0	0	0	0	0	0	0	0	0	1	0	0
hsa-miR-516a-5p	0	0	0	0	0	0	0	1	0	0	0	0	0	0
hsa-miR-190b	0	0	0	0	0	0	0	0	0	0	1	0	0	0
hsa-miR-1909*	0	0	0	0	0	0	1	0	0	0	0	0	0	0
hsa-miR-221	0	0	0	0	0	0	1	0	0	0	0	0	0	0
hsa-let-7d*	0	0	0	0	0	0	1	0	0	0	0	0	0	0
hsa-miR-1257	0	0	0	0	0	0	0	0	0	0	0	0	1	0
hsa-miR-671-3p	0	0	0	0	0	0	0	0	0	0	0	1	0	0
hsa-miR-1277	0	0	0	0	1	0	0	0	0	0	0	0	0	0
hsa-miR-24-2*	0	0	1	0	0	0	0	0	0	0	0	0	0	0
hsa-miR-424*	0	0	0	0	0	0	0	1	0	0	0	0	0	0
hsa-miR-940	0	0	0	0	0	0	0	0	0	0	0	0	0	1
hsa-miR-501-5p	0	0	0	0	0	1	0	0	0	0	0	0	0	0
hsa-miR-99b*	0	0	1	0	0	0	0	0	0	0	0	0	0	0
hsa-miR-181c*	0	0	0	0	0	0	0	0	0	0	1	0	0	0
hsa-miR-10b	0	0	0	1	0	0	0	0	0	0	0	0	0	0
hsa-miR-519a	0	0	0	0	0	0	1	0	0	0	0	0	0	0
hsa-miR-10b*	0	0	0	0	0	1	0	0	0	0	0	0	0	0
hsa-miR-380	0	0	0	0	0	0	0	0	0	0	0	0	1	0
hsa-miR-519a*	0	0	0	1	0	0	0	0	0	0	0	0	0	0
hsa-miR-19a*	0	0	0	0	0	0	0	0	0	0	0	1	0	0
hsa-miR-544	0	0	0	0	0	0	1	0	0	0	0	0	0	0
hsa-miR-302d*	0	0	0	0	0	0	0	0	0	0	1	0	0	0
hsa-miR-892b	0	0	0	0	0	0	0	0	0	0	1	0	0	0
hsa-miR-576-5p	0	0	0	0	0	0	0	1	0	0	0	0	0	0
hsa-miR-135a*	0	0	0	0	0	0	1	0	0	0	0	0	0	0
hsa-miR-302a*	0	0	0	0	1	0	0	0	0	0	0	0	0	0
hsa-miR-630	0	0	0	0	0	0	0	0	0	0	0	1	0	0
hsa-miR-549	0	0	0	0	0	0	0	0	0	0	0	0	1	0
hsa-miR-593	0	0	0	0	0	0	0	0	0	1	0	0	0	0
hsa-miR-33a	0	0	0	0	0	0	0	0	0	0	1	0	0	0
hsa-miR-146b-3p	1	0	0	0	0	0	0	0	0	0	0	0	0	0
hsa-miR-21*	0	0	0	0	0	1	0	0	0	0	0	0	0	0
hsa-miR-652	0	0	0	0	0	0	0	1	0	0	0	0	0	0
hsa-miR-586	0	0	0	0	0	0	0	0	0	0	0	0	1	0
hsa-miR-523	0	0	0	0	0	1	0	0	0	0	0	0	0	0
hsa-miR-345	0	0	0	0	0	0	0	0	0	0	0	0	1	0
hsa-miR-516a-3p	0	0	0	0	0	0	0	0	0	0	1	0	0	0
hsa-miR-150*	0	0	0	0	0	1	0	0	0	0	0	0	0	0
hsa-let-7f-2*	0	0	1	0	0	0	0	0	0	0	0	0	0	0

## Sheet: RFE_ems
	lung cancer	multiple sclerosis	other pancreatic tumors and diseases	pancreatitis	pancreatic cancer ductal	tumor of stomach	sarcoidosis	melanoma	wilms tumor	prostate cancer	acure myocard infarction	periodontitis	ovarian cancer	copd
hsa-let-7a	0	1	2	4	4	0	1	0	0	0	0	0	0	0
hsa-let-7b	2	0	4	1	4	0	3	1	0	0	0	0	0	3
hsa-let-7c	1	0	2	0	0	0	0	2	0	0	0	0	0	0
hsa-let-7d	0	0	4	2	2	0	0	4	0	1	0	0	0	0
hsa-let-7d*	0	0	0	2	0	0	0	8	0	0	0	0	0	1
hsa-let-7e	1	20	5	7	3	1	1	3	0	4	4	1	0	3
hsa-let-7f	0	1	1	0	0	0	0	1	0	0	0	0	0	0
hsa-let-7g	1	0	0	0	0	0	0	0	0	0	0	0	0	0
hsa-let-7i	0	0	8	0	3	0	0	14	0	0	0	0	0	0
hsa-miR-100	1	1	0	0	0	7	0	0	34	2	3	4	8	0
hsa-miR-101	8	8	9	4	12	11	9	7	8	7	6	15	12	13
hsa-miR-101*	5	8	1	10	0	2	7	3	1	7	2	0	0	1
hsa-miR-103	4	6	4	10	1	2	4	8	5	7	8	5	6	6
hsa-miR-103-as	6	3	3	3	6	2	13	2	4	5	5	11	6	17
hsa-miR-105	0	0	0	0	0	0	0	2	0	0	2	0	0	0
hsa-miR-106a	1	0	1	3	0	0	0	0	0	0	0	0	0	1
hsa-miR-106b	1	0	5	6	3	0	0	2	0	0	4	0	0	3
hsa-miR-106b*	0	0	0	0	0	1	0	0	0	0	0	0	0	7
hsa-miR-107	4	5	3	6	3	5	0	3	0	1	3	0	2	2
hsa-miR-10a	0	0	0	1	0	0	1	0	0	0	0	0	0	0
hsa-miR-10a*	0	0	0	0	0	0	0	0	0	0	1	0	0	0
hsa-miR-1179	0	0	0	0	0	0	0	0	0	1	0	0	0	0
hsa-miR-1180	0	0	1	0	0	0	0	0	0	0	0	0	0	0
hsa-miR-1181	3	0	0	0	0	2	3	0	0	0	0	1	0	0
hsa-miR-1183	5	1	1	2	1	1	3	0	0	2	3	7	0	0
hsa-miR-1197	0	0	0	0	12	0	0	0	0	0	0	0	0	0
hsa-miR-1200	0	0	0	0	0	0	1	0	0	1	0	0	0	0
hsa-miR-1201	0	0	0	0	0	0	1	0	0	0	0	0	0	0
hsa-miR-1206	0	0	0	0	2	0	0	1	0	0	0	0	0	0
hsa-miR-1207-5p	1	0	0	0	0	0	0	0	0	0	2	0	0	1
hsa-miR-1208	0	0	2	2	8	2	2	1	0	1	1	0	0	2
hsa-miR-122	0	0	0	0	5	0	0	0	0	0	6	0	0	0
hsa-miR-1225-3p	0	0	4	2	1	2	0	2	0	2	0	0	0	0
hsa-miR-1226	9	4	0	0	1	0	4	8	0	1	5	0	2	0
hsa-miR-1226*	0	0	0	0	2	0	0	0	0	0	0	0	0	1
hsa-miR-1227	0	0	0	1	0	0	1	3	0	0	0	0	1	1
hsa-miR-1228	2	0	0	1	0	0	1	1	0	1	0	0	0	0
hsa-miR-1228*	2	0	3	4	0	0	3	3	9	3	5	2	7	2
hsa-miR-1229	0	0	0	2	0	2	0	1	0	0	0	0	1	4
hsa-miR-1231	1	0	0	2	1	0	1	0	0	0	2	0	0	0
hsa-miR-1233	0	0	1	0	0	0	1	0	0	0	1	1	0	0
hsa-miR-1234	2	3	0	0	1	2	1	3	2	0	1	2	3	2
hsa-miR-1237	0	0	0	0	0	2	0	2	0	0	0	0	1	0
hsa-miR-124	0	0	3	0	2	0	1	0	0	0	0	0	0	0
hsa-miR-124*	3	1	4	0	0	1	3	0	0	1	0	1	0	5
hsa-miR-1243	0	2	1	0	0	0	2	0	0	0	0	0	0	0
hsa-miR-1245	0	0	1	0	0	0	0	0	0	0	0	0	0	0
hsa-miR-1247	0	0	0	0	0	0	0	0	0	3	0	1	1	0
hsa-miR-1249	0	0	0	2	0	0	0	0	0	0	0	0	0	0
hsa-miR-1252	0	0	0	0	1	0	0	0	0	0	0	0	0	0
hsa-miR-1254	0	0	0	0	0	0	0	0	0	0	0	0	0	1
hsa-miR-1256	0	0	0	0	4	0	0	0	0	0	0	0	0	0
hsa-miR-125a-5p	19	10	3	5	7	16	9	9	28	11	12	9	23	8
hsa-miR-125b	0	1	0	2	0	1	0	1	0	5	4	1	0	1
hsa-miR-125b-2*	0	0	3	0	0	0	0	0	0	0	0	0	0	0
hsa-miR-126	2	7	10	4	8	1	2	1	0	4	1	0	0	0
hsa-miR-1260	8	8	11	5	4	10	4	8	16	7	6	9	11	16
hsa-miR-1263	1	1	0	0	0	1	0	4	0	1	0	0	0	0
hsa-miR-1264	0	0	0	0	0	0	0	0	0	1	0	0	0	0
hsa-miR-1268	0	2	0	0	2	0	2	0	0	0	0	2	0	0
hsa-miR-127-3p	0	0	0	0	0	0	3	0	0	0	0	2	0	0
hsa-miR-1270	1	0	0	0	0	0	0	0	0	2	0	0	0	0
hsa-miR-1272	0	0	0	0	1	0	0	0	0	0	0	0	0	0
hsa-miR-1274a	7	16	9	4	6	11	9	9	3	12	5	8	12	4
hsa-miR-1274b	11	12	18	9	10	5	7	10	3	7	7	4	4	7
hsa-miR-1275	0	0	0	0	1	0	1	0	0	0	0	0	0	0
hsa-miR-1276	0	0	1	2	1	0	0	2	0	0	0	0	0	0
hsa-miR-1278	0	0	3	0	0	0	0	0	0	0	0	0	0	0
hsa-miR-128	1	2	3	2	4	2	5	5	1	1	3	4	1	5
hsa-miR-1280	0	4	2	7	3	4	2	1	9	6	8	1	8	7
hsa-miR-1281	2	0	0	0	0	0	1	1	0	0	0	0	0	0
hsa-miR-1285	0	0	0	0	0	0	1	0	0	0	0	0	0	0
hsa-miR-1287	0	0	0	0	0	0	0	0	0	1	0	0	0	0
hsa-miR-1288	0	0	8	1	1	0	0	0	0	3	0	0	0	0
hsa-miR-1289	0	0	3	0	1	0	0	0	0	0	0	0	0	0
hsa-miR-129-3p	3	0	2	1	0	0	5	5	2	4	7	0	3	0
hsa-miR-1291	0	0	0	1	5	0	0	0	0	1	0	0	1	1
hsa-miR-1292	0	0	0	0	0	0	0	0	0	0	1	0	0	0
hsa-miR-1296	0	0	0	0	0	0	0	1	0	2	0	0	0	0
hsa-miR-1297	0	0	0	0	1	0	0	0	0	2	0	0	0	0
hsa-miR-1298	0	0	0	0	8	0	0	0	0	0	1	0	0	0
hsa-miR-1301	0	0	0	0	2	0	0	0	0	0	0	0	0	0
hsa-miR-1302	0	0	0	0	0	0	0	0	0	1	0	0	0	0
hsa-miR-1305	2	0	0	0	0	0	2	0	0	0	0	4	0	1
hsa-miR-1307	0	0	0	0	0	0	0	0	0	0	1	0	0	0
hsa-miR-130a	17	16	8	14	3	1	5	9	0	11	7	4	1	13
hsa-miR-130b	4	2	3	3	9	3	4	2	0	8	2	0	1	0
hsa-miR-132	5	1	8	2	2	0	3	1	1	1	4	2	1	1
hsa-miR-1322	0	0	1	3	0	3	0	2	4	2	0	2	4	2
hsa-miR-1323	0	0	0	0	0	0	0	0	0	3	0	0	0	0
hsa-miR-133a	0	0	0	0	0	0	1	0	0	0	0	0	0	0
hsa-miR-133b	0	0	0	0	2	0	0	0	0	0	0	0	0	0
hsa-miR-134	0	0	0	0	0	0	0	0	0	0	0	0	1	0
hsa-miR-137	4	0	6	5	0	5	9	2	5	0	4	9	2	0
hsa-miR-138	0	0	0	0	0	0	0	0	0	0	0	0	1	0
hsa-miR-138-1*	2	0	0	0	0	1	0	0	1	0	1	0	0	0
hsa-miR-138-2*	2	0	0	0	0	0	2	0	0	1	0	0	0	0
hsa-miR-140-3p	0	4	0	0	0	4	0	2	4	2	2	8	2	2
hsa-miR-141	0	0	0	0	0	0	0	0	0	0	2	0	0	0
hsa-miR-141*	3	2	2	0	0	1	8	0	0	1	2	13	1	0
hsa-miR-142-5p	4	16	10	5	5	4	5	15	4	8	9	7	1	8
hsa-miR-143	0	0	0	0	0	0	0	1	0	1	0	0	1	1
hsa-miR-143*	0	1	0	0	0	1	0	0	3	2	5	0	1	0
hsa-miR-144	6	2	7	3	12	0	2	10	0	2	11	2	5	14
hsa-miR-144*	0	2	2	7	9	0	0	0	0	0	3	0	1	4
hsa-miR-145	12	4	4	9	4	3	4	23	0	0	0	4	7	0
hsa-miR-145*	4	3	2	9	0	4	6	1	1	2	0	3	2	0
hsa-miR-146a	2	1	2	4	0	5	0	1	24	6	4	7	5	7
hsa-miR-146a*	0	0	0	1	0	0	0	0	0	0	0	0	0	0
hsa-miR-146b-5p	1	10	0	1	0	8	2	1	10	6	9	8	6	7
hsa-miR-147	0	0	0	0	2	0	0	0	0	0	0	0	0	0
hsa-miR-1470	1	0	3	0	0	9	2	0	6	3	0	1	3	2
hsa-miR-148a	12	8	2	7	9	12	11	9	11	7	13	13	22	7
hsa-miR-148a*	0	0	0	1	0	0	0	0	0	0	0	0	0	0
hsa-miR-148b	0	0	0	0	1	0	0	0	0	0	0	0	0	0
hsa-miR-149*	1	1	1	1	0	3	4	2	8	2	6	0	1	0
hsa-miR-150	1	8	4	9	9	5	2	15	0	0	4	6	5	7
hsa-miR-150*	6	1	0	1	0	1	0	0	3	3	3	2	3	0
hsa-miR-151-3p	8	10	3	9	17	8	8	6	11	3	6	18	11	6
hsa-miR-151-5p	10	4	13	5	13	1	2	1	1	10	9	3	4	6
hsa-miR-1537	0	0	0	0	0	0	0	0	0	2	0	0	0	0
hsa-miR-1538	0	0	2	1	1	0	0	0	0	0	0	0	0	0
hsa-miR-1539	1	2	0	2	8	1	3	1	0	1	2	3	1	11
hsa-miR-154*	0	0	0	0	1	0	0	0	0	0	0	0	0	0
hsa-miR-155	4	0	1	7	2	0	2	6	1	9	1	2	6	0
hsa-miR-155*	1	0	4	5	1	0	2	0	0	0	0	0	0	0
hsa-miR-15a	3	4	11	9	6	0	2	7	0	1	3	3	2	1
hsa-miR-15a*	0	2	0	0	0	1	1	0	0	0	0	0	0	2
hsa-miR-15b	12	3	13	9	19	1	4	8	3	6	7	3	3	12
hsa-miR-15b*	8	0	0	1	0	0	7	15	0	1	0	2	8	2
hsa-miR-16	5	14	2	5	6	1	8	6	7	7	20	10	7	12
hsa-miR-16-1*	0	3	1	15	1	0	3	0	1	2	1	0	1	0
hsa-miR-16-2*	4	1	1	0	0	1	6	0	0	0	5	4	0	1
hsa-miR-17	2	0	3	1	2	0	2	0	0	0	0	0	0	4
hsa-miR-181a	0	4	0	6	2	1	2	1	4	2	1	0	0	2
hsa-miR-181a*	5	0	0	0	0	0	8	1	0	1	0	0	3	0
hsa-miR-181a-2*	2	0	0	0	0	0	3	6	0	0	0	1	0	0
hsa-miR-181b	0	0	1	0	0	0	0	0	0	0	0	0	0	0
hsa-miR-181c	1	6	0	0	0	1	2	3	2	2	2	3	3	1
hsa-miR-181c*	0	0	0	0	0	0	1	0	0	1	0	0	0	0
hsa-miR-182	7	11	10	5	9	15	15	10	8	13	13	10	5	12
hsa-miR-1825	0	0	0	0	0	0	0	1	0	0	0	0	0	0
hsa-miR-1826	1	4	0	0	0	1	5	0	0	2	0	0	3	6
hsa-miR-1827	1	2	0	0	0	0	1	0	1	2	0	1	0	0
hsa-miR-183	2	7	2	1	8	10	5	4	18	4	7	8	2	3
hsa-miR-183*	7	12	0	1	0	6	16	4	9	3	0	9	18	2
hsa-miR-184	3	0	0	0	0	0	0	0	0	1	0	0	0	0
hsa-miR-185	2	7	0	2	3	13	2	4	14	4	2	8	7	5
hsa-miR-186	4	6	0	1	0	1	9	8	0	1	1	0	0	0
hsa-miR-186*	0	1	0	0	0	0	0	0	0	0	0	0	1	0
hsa-miR-187*	0	0	0	0	0	0	1	0	0	2	0	0	0	0
hsa-miR-188-5p	12	4	0	3	0	4	14	3	1	2	5	5	6	1
hsa-miR-18a	0	0	0	0	2	0	0	0	0	0	0	0	0	0
hsa-miR-18a*	2	3	2	1	3	4	3	3	5	0	0	2	0	5
hsa-miR-18b	0	0	0	0	0	0	0	0	0	0	0	0	0	1
hsa-miR-18b*	3	2	4	0	7	1	18	2	0	2	1	0	1	0
hsa-miR-1908	1	1	1	7	0	1	2	3	2	0	5	1	6	2
hsa-miR-191	9	3	3	2	1	13	2	4	7	5	10	5	7	9
hsa-miR-191*	2	0	7	5	0	0	0	1	0	0	0	0	0	1
hsa-miR-1910	0	0	0	2	0	0	0	0	0	0	0	0	0	0
hsa-miR-1913	2	2	0	1	1	11	1	1	3	0	6	3	3	3
hsa-miR-1914*	14	9	4	3	9	21	10	13	3	9	13	8	8	6
hsa-miR-1915	2	4	3	4	3	5	6	1	7	1	5	3	4	2
hsa-miR-192	10	8	1	5	6	8	1	5	5	11	7	13	3	14
hsa-miR-193a-3p	1	7	1	0	2	3	13	15	10	8	5	3	8	18
hsa-miR-193a-5p	0	0	0	0	0	0	3	5	0	0	0	0	0	0
hsa-miR-193b	0	0	1	1	0	0	1	0	0	5	2	0	0	0
hsa-miR-194	17	20	14	20	14	21	6	13	24	26	26	24	22	19
hsa-miR-194*	2	0	4	0	0	0	0	1	0	0	0	0	0	0
hsa-miR-195	0	0	0	0	3	0	8	0	0	0	0	0	0	0
hsa-miR-195*	11	1	2	0	3	2	12	5	3	8	12	5	9	2
hsa-miR-197	1	12	2	10	7	3	1	5	1	6	5	5	6	3
hsa-miR-198	0	0	0	4	0	0	0	0	0	4	0	0	0	0
hsa-miR-199a-3p	8	8	3	12	1	9	17	6	7	18	2	6	15	1
hsa-miR-199a-5p	5	5	8	3	2	10	4	6	11	3	14	6	12	0
hsa-miR-199b-3p	4	1	1	3	4	4	2	0	3	6	1	1	3	7
hsa-miR-19a	9	1	9	2	9	0	9	8	0	4	7	1	1	7
hsa-miR-19a*	2	4	0	6	9	0	0	3	0	3	2	1	0	0
hsa-miR-19b	13	5	7	9	20	11	4	18	6	12	17	13	15	8
hsa-miR-19b-1*	0	2	1	0	2	0	0	1	0	2	0	0	0	0
hsa-miR-200a	0	0	0	6	4	0	0	1	0	0	0	0	0	0
hsa-miR-200a*	0	0	0	1	0	0	0	0	0	0	0	0	0	0
hsa-miR-200b	5	0	8	12	0	0	2	5	0	2	2	1	1	0
hsa-miR-200b*	0	0	0	0	0	0	3	0	0	0	3	6	0	0
hsa-miR-200c	10	1	1	1	0	0	10	3	0	4	6	4	2	4
hsa-miR-202*	0	0	0	0	0	0	0	0	0	0	0	0	1	0
hsa-miR-208b	3	2	11	9	0	2	3	0	0	0	1	1	0	1
hsa-miR-20a	1	4	2	2	1	0	0	0	0	2	0	0	0	5
hsa-miR-20b	0	0	1	1	2	0	1	1	0	0	0	0	0	0
hsa-miR-20b*	0	0	0	2	0	0	4	1	0	5	1	0	0	0
hsa-miR-21	4	2	12	9	19	0	1	1	0	1	6	0	0	0
hsa-miR-210	8	3	4	16	7	6	9	2	10	5	8	13	4	8
hsa-miR-214*	0	0	0	3	3	0	1	0	0	0	2	0	0	0
hsa-miR-215	1	3	9	4	6	13	1	2	7	1	4	11	10	10
hsa-miR-216a	1	0	0	1	0	0	0	0	0	0	0	0	0	0
hsa-miR-216b	1	2	1	1	2	8	1	1	2	0	2	5	0	5
hsa-miR-218	0	0	0	2	0	0	0	0	0	0	0	0	0	0
hsa-miR-218-1*	0	0	0	0	0	0	0	0	1	0	0	1	0	0
hsa-miR-219-5p	0	0	0	0	0	0	1	0	0	0	2	0	0	0
hsa-miR-22	9	11	3	4	2	18	9	6	13	18	12	22	18	12
hsa-miR-22*	0	0	0	0	1	0	0	0	0	0	0	0	0	0
hsa-miR-220a	0	0	0	0	0	3	0	0	0	0	0	1	0	0
hsa-miR-220b	0	0	2	0	0	0	0	3	0	4	1	1	0	1
hsa-miR-220c	0	1	0	2	1	0	1	0	2	0	0	1	1	1
hsa-miR-221	4	6	0	0	1	15	6	3	15	4	6	6	17	3
hsa-miR-221*	0	0	0	0	0	0	1	0	0	0	0	0	0	1
hsa-miR-222	9	15	3	3	2	2	3	10	0	2	3	8	4	5
hsa-miR-223	6	1	4	3	11	4	11	4	1	5	2	1	12	2
hsa-miR-23a	16	7	5	7	4	18	5	5	7	6	11	12	5	7
hsa-miR-23b	3	5	2	6	11	5	4	0	2	3	1	2	2	3
hsa-miR-24	4	0	2	2	2	0	3	2	0	2	1	1	0	0
hsa-miR-25	10	17	9	2	5	22	3	3	21	5	7	9	10	10
hsa-miR-25*	0	0	2	0	0	0	0	0	0	0	0	0	0	0
hsa-miR-26a	6	13	6	13	5	14	14	11	20	13	17	12	13	10
hsa-miR-26b	1	1	3	3	0	1	1	2	0	3	0	1	0	2
hsa-miR-27a	4	5	11	7	5	3	5	5	2	11	7	7	6	2
hsa-miR-27a*	0	0	0	4	0	0	0	0	0	0	0	0	0	0
hsa-miR-27b	2	0	2	1	0	0	0	1	1	0	4	0	9	1
hsa-miR-28-3p	2	3	4	0	0	8	5	1	7	3	8	7	5	4
hsa-miR-28-5p	1	19	5	5	5	17	3	2	30	6	3	6	11	5
hsa-miR-296-5p	1	9	1	0	0	12	2	3	11	1	7	7	3	9
hsa-miR-297	6	0	0	0	0	2	0	4	0	5	1	0	1	0
hsa-miR-29a	7	11	4	6	3	3	3	11	0	7	8	7	5	2
hsa-miR-29b	1	8	3	2	7	8	3	2	8	1	4	4	4	0
hsa-miR-29b-2*	0	2	0	0	0	0	0	5	0	3	0	1	0	3
hsa-miR-29c	13	16	4	21	32	26	10	8	10	22	14	13	24	10
hsa-miR-300	3	0	3	14	1	0	2	0	0	0	0	0	0	0
hsa-miR-301a	0	5	2	0	1	0	0	0	0	0	0	0	2	5
hsa-miR-302a*	0	0	0	2	0	0	0	0	0	0	0	0	0	0
hsa-miR-302d*	0	0	0	0	0	0	0	2	0	0	0	0	0	0
hsa-miR-30a	5	5	9	9	4	2	1	4	2	2	1	1	0	6
hsa-miR-30a*	0	1	0	0	4	0	0	0	0	0	0	0	0	0
hsa-miR-30b	1	4	7	3	5	8	3	11	9	6	8	3	13	9
hsa-miR-30c	5	0	17	7	10	0	1	4	0	0	1	2	2	3
hsa-miR-30c-1*	0	0	0	0	0	0	0	0	0	0	1	0	0	0
hsa-miR-30d	5	13	9	18	7	4	8	21	3	10	6	5	3	12
hsa-miR-30d*	4	3	1	0	1	0	3	2	0	0	3	1	0	0
hsa-miR-30e	8	3	11	10	5	13	2	2	4	7	4	7	4	9
hsa-miR-31	0	0	0	0	0	0	1	0	0	0	0	0	0	0
hsa-miR-320a	0	3	0	1	3	4	1	1	15	1	5	2	11	3
hsa-miR-320b	2	0	2	0	3	1	3	0	10	1	1	2	0	2
hsa-miR-320c	0	0	2	2	3	0	0	1	7	0	1	1	4	1
hsa-miR-320d	1	0	0	1	3	0	3	1	6	0	1	0	2	5
hsa-miR-324-3p	0	3	3	3	1	0	2	6	3	0	8	3	4	3
hsa-miR-324-5p	0	5	5	0	4	6	4	1	9	1	2	1	2	7
hsa-miR-325	0	0	0	0	0	0	0	0	0	1	0	2	0	0
hsa-miR-326	1	0	0	0	0	5	3	0	0	2	4	3	1	0
hsa-miR-328	1	0	0	0	1	0	3	0	0	0	0	0	0	0
hsa-miR-329	0	5	0	0	0	2	1	0	0	1	0	1	2	0
hsa-miR-331-3p	22	3	18	13	10	12	10	9	4	7	14	17	14	5
hsa-miR-331-5p	0	0	0	0	3	0	0	0	0	0	0	0	0	0
hsa-miR-335	4	8	2	5	2	8	2	2	26	10	3	3	10	4
hsa-miR-337-5p	0	0	0	0	0	0	0	1	0	0	0	0	1	0
hsa-miR-339-3p	0	0	0	0	0	0	5	4	0	1	0	0	0	0
hsa-miR-339-5p	5	7	4	5	7	24	2	6	23	11	13	10	11	9
hsa-miR-33a*	0	0	0	0	2	0	0	0	0	0	0	0	0	0
hsa-miR-33b*	0	0	3	2	0	0	0	0	0	0	0	0	0	0
hsa-miR-340	0	10	4	3	0	8	2	0	9	4	7	6	0	1
hsa-miR-342-3p	5	5	5	6	3	4	0	0	15	8	5	7	4	3
hsa-miR-342-5p	8	5	0	1	0	1	6	7	8	3	7	3	1	2
hsa-miR-345	2	1	6	3	0	2	0	1	3	0	0	0	2	2
hsa-miR-346	3	0	0	0	0	0	1	0	0	2	3	0	0	1
hsa-miR-34b	0	0	0	0	0	0	0	1	0	0	0	0	0	0
hsa-miR-34c-3p	0	0	0	0	0	0	0	1	0	0	0	0	0	0
hsa-miR-34c-5p	2	0	0	0	0	0	1	0	0	0	0	0	0	0
hsa-miR-361-3p	0	1	1	0	0	0	3	1	2	0	3	2	1	0
hsa-miR-361-5p	11	3	6	8	4	10	1	3	4	6	4	5	12	0
hsa-miR-362-3p	7	6	3	5	6	5	2	16	3	8	9	2	6	9
hsa-miR-362-5p	6	10	4	3	8	7	5	4	2	11	6	9	6	18
hsa-miR-363	18	17	12	13	14	4	6	10	1	3	3	9	7	8
hsa-miR-365	3	0	0	0	0	0	4	1	0	0	1	0	0	0
hsa-miR-369-3p	0	0	1	0	0	0	0	0	0	0	0	0	0	0
hsa-miR-369-5p	1	0	0	0	0	0	0	1	0	0	1	1	1	0
hsa-miR-370	4	0	0	0	3	7	1	1	0	6	2	5	1	0
hsa-miR-371-3p	1	0	0	4	0	1	0	1	0	4	0	0	0	0
hsa-miR-372	0	0	1	0	0	0	0	0	0	0	0	0	0	0
hsa-miR-374a	2	0	2	0	7	1	1	0	1	1	1	3	5	2
hsa-miR-374a*	0	0	1	8	3	0	0	1	0	0	0	0	0	0
hsa-miR-374b	4	0	4	3	3	1	0	2	0	1	2	2	0	1
hsa-miR-374b*	1	0	5	0	0	0	0	0	0	0	0	0	0	0
hsa-miR-376a	0	0	0	0	0	0	3	1	0	0	0	0	0	0
hsa-miR-376a*	0	0	0	0	1	0	0	0	0	0	0	0	0	0
hsa-miR-376b	0	0	0	0	1	0	0	0	0	0	0	0	0	0
hsa-miR-376c	9	2	13	12	1	3	5	6	2	4	1	0	5	4
hsa-miR-377	1	1	0	1	1	0	4	0	0	0	1	0	0	0
hsa-miR-378	2	2	5	3	1	7	3	1	2	1	0	6	2	14
hsa-miR-380	0	0	0	0	0	1	0	0	0	0	0	0	0	0
hsa-miR-380*	3	0	6	0	1	0	1	0	2	1	0	0	3	0
hsa-miR-381	2	0	0	3	3	1	7	1	0	1	5	3	2	2
hsa-miR-409-3p	1	0	0	0	0	0	3	8	0	0	0	2	0	1
hsa-miR-409-5p	2	0	0	0	0	0	0	1	0	0	0	1	0	0
hsa-miR-410	0	0	0	0	0	0	0	0	0	0	0	0	0	1
hsa-miR-411	0	3	0	1	0	0	0	0	0	0	0	0	4	0
hsa-miR-421	0	0	4	0	0	0	0	0	0	0	1	0	0	0
hsa-miR-422a	5	3	5	8	5	9	3	3	30	4	6	13	11	15
hsa-miR-423-3p	4	6	11	13	4	6	8	7	5	6	4	6	7	10
hsa-miR-423-5p	0	0	6	0	5	1	1	1	0	6	0	0	3	0
hsa-miR-424	0	1	1	0	3	0	0	2	0	0	0	0	0	1
hsa-miR-424*	2	8	0	1	1	4	3	5	0	6	0	3	8	4
hsa-miR-425	1	5	2	7	2	3	2	3	6	6	5	4	8	7
hsa-miR-425*	0	0	1	0	0	0	0	0	0	0	0	0	0	0
hsa-miR-432*	0	0	0	0	0	1	1	2	0	0	2	1	2	0
hsa-miR-450b-3p	0	0	0	0	0	0	0	0	0	0	0	2	0	0
hsa-miR-451	2	2	0	10	2	1	0	9	0	2	2	1	0	8
hsa-miR-452	0	0	1	0	0	0	0	0	0	0	0	0	0	0
hsa-miR-454	3	3	2	0	0	5	3	5	12	5	3	4	6	6
hsa-miR-483-5p	0	1	0	0	0	0	0	0	0	0	1	0	0	0
hsa-miR-484	3	10	5	5	6	9	4	3	24	6	6	9	12	6
hsa-miR-485-3p	14	2	0	0	0	0	28	9	0	12	5	1	0	2
hsa-miR-485-5p	4	0	0	0	0	3	0	1	1	0	3	0	0	0
hsa-miR-486-3p	2	7	3	2	0	4	0	1	31	3	2	4	6	5
hsa-miR-486-5p	15	1	17	16	25	13	17	5	3	19	14	14	11	25
hsa-miR-487a	6	0	0	0	0	0	0	0	1	0	1	4	0	1
hsa-miR-487b	2	1	0	0	0	0	0	0	0	0	1	0	0	0
hsa-miR-489	0	0	0	0	1	0	0	0	0	0	0	0	0	0
hsa-miR-490-3p	1	0	3	3	1	0	0	0	0	0	0	0	0	0
hsa-miR-491-5p	1	0	0	0	0	0	0	0	0	0	0	0	0	0
hsa-miR-493*	0	0	2	0	0	0	0	0	0	0	0	0	0	0
hsa-miR-494	1	12	8	1	0	6	6	17	0	3	7	10	0	2
hsa-miR-495	3	0	1	2	1	0	1	7	0	0	3	1	4	0
hsa-miR-496	0	0	4	0	2	0	0	0	0	0	0	0	0	0
hsa-miR-497*	4	0	7	1	1	1	8	0	3	4	0	2	2	4
hsa-miR-499-3p	0	0	0	0	0	0	0	0	0	0	1	0	0	0
hsa-miR-499-5p	2	0	4	2	4	0	0	0	0	0	0	0	0	0
hsa-miR-500	1	0	0	0	0	0	5	4	0	0	0	0	0	2
hsa-miR-501-3p	0	0	4	0	3	0	1	1	0	1	0	0	0	0
hsa-miR-502-3p	0	9	9	7	10	2	6	2	0	2	7	0	2	4
hsa-miR-504	0	0	0	0	0	0	0	0	0	0	0	0	0	1
hsa-miR-505*	1	0	0	0	0	2	0	1	0	4	1	0	0	1
hsa-miR-506	0	0	0	1	2	0	0	0	0	0	0	0	0	0
hsa-miR-510	1	0	0	0	4	0	0	0	0	0	0	0	0	0
hsa-miR-511	0	0	0	0	1	0	0	0	0	0	0	0	0	0
hsa-miR-513b	0	0	5	0	0	0	0	1	0	0	1	0	0	0
hsa-miR-513c	0	0	0	0	1	0	0	0	0	0	0	0	0	0
hsa-miR-516b	0	0	0	0	1	0	0	1	0	0	0	0	0	0
hsa-miR-516b*	0	0	0	3	2	0	0	0	0	0	0	0	0	0
hsa-miR-517a	0	0	0	0	0	0	0	0	0	0	1	1	0	0
hsa-miR-518a-3p	0	0	0	0	0	0	2	0	0	0	0	0	1	0
hsa-miR-518b	0	0	0	1	1	0	0	0	0	0	0	2	0	0
hsa-miR-518c	0	2	0	1	0	0	1	0	0	0	1	0	0	0
hsa-miR-518d-3p	0	0	0	0	0	0	1	0	0	0	0	0	0	0
hsa-miR-518e	0	0	8	0	0	0	0	1	0	0	0	1	0	0
hsa-miR-518e*	0	0	0	0	0	0	0	0	0	0	0	0	0	1
hsa-miR-518f	0	0	0	0	0	0	2	0	0	0	0	0	0	0
hsa-miR-519b-3p	0	0	2	0	0	0	0	0	0	0	0	1	0	0
hsa-miR-519c-3p	0	0	0	0	0	0	0	0	0	0	1	0	0	0
hsa-miR-519c-5p	0	0	0	0	1	0	0	0	0	0	0	0	0	0
hsa-miR-519d	0	0	0	0	8	0	0	0	0	0	0	0	0	0
hsa-miR-520d-5p	0	0	0	0	0	0	1	0	0	0	0	0	0	0
hsa-miR-520g	2	0	6	0	0	0	0	0	0	1	0	0	0	0
hsa-miR-521	0	0	1	0	0	0	0	2	0	0	0	0	0	0
hsa-miR-523*	0	0	0	1	0	0	0	0	0	0	0	0	0	0
hsa-miR-532-3p	2	5	8	13	7	3	0	3	8	0	10	9	4	10
hsa-miR-532-5p	1	2	2	1	4	3	1	2	1	2	6	7	3	2
hsa-miR-541	2	1	0	0	0	0	0	0	0	2	1	0	1	3
hsa-miR-542-3p	1	0	1	0	0	0	1	0	1	0	0	0	0	1
hsa-miR-542-5p	9	2	0	0	5	3	13	4	0	4	4	4	0	0
hsa-miR-548a-3p	0	0	0	0	0	0	0	0	0	0	0	0	0	1
hsa-miR-548b-3p	0	0	0	0	0	0	1	0	0	1	0	0	2	1
hsa-miR-548c-5p	0	0	2	0	8	0	0	0	0	0	0	0	0	0
hsa-miR-548d-3p	2	0	2	0	0	0	0	7	2	4	0	3	0	1
hsa-miR-548f	4	10	0	1	0	10	2	2	0	2	4	5	2	13
hsa-miR-548g	0	0	1	0	0	0	0	0	1	0	0	0	0	0
hsa-miR-548k	0	0	0	1	0	0	0	0	0	0	0	0	0	0
hsa-miR-548n	0	0	0	0	1	0	0	0	0	0	0	0	0	0
hsa-miR-548o	0	0	11	0	0	0	0	0	0	0	0	0	0	0
hsa-miR-549	0	0	0	0	0	0	0	0	0	1	0	0	0	0
hsa-miR-550	3	5	2	0	0	0	3	8	0	6	0	1	0	2
hsa-miR-550*	9	8	10	14	17	8	12	15	13	12	13	12	8	12
hsa-miR-551a	0	0	0	0	1	0	0	0	0	0	0	0	0	0
hsa-miR-551b*	0	0	0	0	0	0	0	4	0	0	0	1	6	0
hsa-miR-552	0	0	0	3	0	0	0	1	0	0	0	1	0	0
hsa-miR-555	0	0	0	0	8	0	0	0	0	0	0	0	0	1
hsa-miR-556-5p	0	0	0	0	0	0	2	0	0	0	0	0	0	0
hsa-miR-558	0	0	0	5	0	0	0	0	0	0	0	0	0	0
hsa-miR-561	0	0	0	0	0	0	1	0	0	0	0	0	0	0
hsa-miR-562	0	1	0	0	0	0	4	0	0	1	0	1	0	0
hsa-miR-563	0	1	0	0	0	0	0	0	0	0	0	0	0	0
hsa-miR-569	0	0	0	1	0	0	0	0	0	0	0	0	0	0
hsa-miR-570	0	0	0	0	0	0	1	0	0	6	0	4	0	6
hsa-miR-572	0	0	2	1	0	0	0	0	0	5	0	0	0	0
hsa-miR-574-3p	0	0	3	3	5	1	0	0	0	1	1	7	1	1
hsa-miR-574-5p	0	2	0	3	0	5	3	2	13	1	2	8	3	9
hsa-miR-580	0	0	1	3	0	0	0	0	0	0	0	0	0	0
hsa-miR-582-3p	11	1	0	0	0	2	0	1	0	0	6	1	1	1
hsa-miR-582-5p	0	0	2	0	0	0	0	0	0	0	0	0	0	0
hsa-miR-584	1	0	0	1	0	1	3	6	0	0	0	0	0	0
hsa-miR-586	8	0	0	1	0	0	0	1	1	3	0	5	3	0
hsa-miR-589	5	0	1	1	0	11	5	1	1	11	0	2	2	2
hsa-miR-589*	1	0	0	3	6	0	3	1	0	1	0	0	0	3
hsa-miR-590-5p	5	2	1	1	2	1	1	0	0	0	3	0	1	1
hsa-miR-591	0	0	0	0	0	0	4	0	0	0	1	2	0	0
hsa-miR-595	3	2	0	1	0	4	3	2	2	1	1	5	0	3
hsa-miR-597	1	0	0	0	0	0	1	0	0	7	1	3	1	0
hsa-miR-598	0	0	0	0	0	1	0	2	0	0	0	0	0	0
hsa-miR-607	0	0	0	0	1	0	0	0	0	0	0	0	0	0
hsa-miR-608	3	2	0	3	0	1	2	1	0	4	1	1	0	3
hsa-miR-611	0	0	0	0	0	0	1	0	0	0	0	0	0	0
hsa-miR-612	1	0	0	0	10	0	1	0	0	0	1	0	0	0
hsa-miR-615-5p	0	0	0	0	0	0	0	0	0	0	2	1	1	0
hsa-miR-616*	0	0	0	0	6	0	3	0	0	0	0	0	0	0
hsa-miR-617	0	0	0	0	1	0	0	0	0	0	0	0	0	0
hsa-miR-619	0	0	2	0	0	0	1	0	0	1	0	0	0	0
hsa-miR-622	0	0	8	0	0	1	0	0	0	5	0	0	0	0
hsa-miR-624	0	1	0	0	0	0	0	2	0	0	0	0	0	0
hsa-miR-625	8	4	5	0	1	1	0	7	0	7	3	0	5	0
hsa-miR-625*	2	9	1	8	7	11	2	3	10	3	3	3	6	8
hsa-miR-626	0	0	0	0	0	0	0	0	0	0	2	0	0	0
hsa-miR-627	0	1	3	5	0	0	0	0	0	3	0	1	0	0
hsa-miR-628-3p	2	14	3	7	1	19	1	2	25	4	3	10	16	2
hsa-miR-629	0	0	0	0	0	0	0	2	0	0	0	0	0	0
hsa-miR-629*	1	0	0	0	0	0	2	2	0	0	0	0	0	0
hsa-miR-630	0	1	0	0	0	0	0	0	0	0	0	0	0	0
hsa-miR-631	0	0	1	0	0	0	0	0	0	0	0	0	0	0
hsa-miR-634	4	2	0	5	1	3	2	3	0	3	0	10	13	2
hsa-miR-635	0	0	1	0	0	3	0	0	0	0	0	0	1	1
hsa-miR-636	2	15	12	10	10	1	6	19	5	11	7	13	11	2
hsa-miR-638	1	0	2	3	4	0	3	1	0	0	2	2	0	1
hsa-miR-639	2	1	0	3	0	0	0	0	0	0	0	0	1	0
hsa-miR-641	1	1	0	0	7	0	1	1	1	2	0	0	0	0
hsa-miR-642	0	0	0	0	1	0	0	0	0	2	0	0	1	0
hsa-miR-643	0	0	0	2	2	0	0	0	0	0	0	0	0	0
hsa-miR-644	0	0	1	0	0	0	0	0	0	0	1	0	0	0
hsa-miR-645	0	0	0	0	0	0	0	0	0	0	0	0	2	0
hsa-miR-648	0	0	0	4	0	0	1	0	0	0	2	5	1	0
hsa-miR-650	0	0	0	0	0	0	1	0	0	1	0	0	0	0
hsa-miR-652	6	1	8	8	8	2	7	0	0	12	5	0	3	4
hsa-miR-653	0	0	0	0	0	0	0	0	0	0	0	0	1	0
hsa-miR-654-5p	0	0	1	0	2	0	0	0	0	0	0	0	0	0
hsa-miR-655	0	0	1	0	0	0	0	0	0	0	0	0	0	0
hsa-miR-656	1	0	0	0	1	0	0	5	0	0	2	1	0	0
hsa-miR-657	0	0	2	0	1	0	0	0	0	0	0	0	0	0
hsa-miR-658	0	1	0	0	0	0	0	2	0	2	0	0	0	1
hsa-miR-659	3	4	0	0	2	1	8	6	2	11	6	7	4	1
hsa-miR-660	0	11	1	0	4	9	6	2	7	4	13	8	9	5
hsa-miR-661	9	1	7	0	0	0	0	1	0	2	1	2	1	0
hsa-miR-663	0	0	0	0	0	1	0	0	0	0	0	0	0	0
hsa-miR-663b	7	4	11	0	1	2	0	2	0	2	0	2	4	8
hsa-miR-664	5	5	10	2	2	0	6	4	0	4	1	0	0	3
hsa-miR-664*	0	0	2	0	0	0	7	0	0	0	2	0	0	0
hsa-miR-671-5p	1	0	3	0	0	0	3	1	0	0	0	0	0	0
hsa-miR-675	0	1	2	2	0	1	2	2	0	6	1	0	1	2
hsa-miR-7	2	3	0	0	0	0	0	0	0	1	0	0	0	0
hsa-miR-7-1*	0	0	3	3	0	1	4	0	1	0	0	0	1	0
hsa-miR-7-2*	0	0	4	0	1	0	0	0	0	0	0	0	0	0
hsa-miR-708	3	0	0	0	0	0	2	5	0	0	0	2	0	0
hsa-miR-708*	0	0	1	0	0	0	1	0	0	0	0	0	0	0
hsa-miR-720	4	17	3	7	6	12	5	4	10	7	8	22	8	14
hsa-miR-744	9	4	5	6	4	2	2	3	1	3	7	4	1	10
hsa-miR-744*	0	0	0	0	0	0	1	0	0	0	0	0	0	0
hsa-miR-760	0	0	0	1	0	0	0	0	0	0	0	0	0	0
hsa-miR-766	1	0	0	1	0	0	1	0	0	0	5	0	3	2
hsa-miR-769-3p	0	0	0	0	10	0	0	0	0	0	0	0	0	0
hsa-miR-770-5p	0	0	4	2	0	0	1	0	0	0	0	0	0	0
hsa-miR-802	0	0	0	0	2	0	0	0	0	0	0	0	0	0
hsa-miR-873	0	0	2	4	0	1	3	0	0	3	0	1	0	2
hsa-miR-874	10	19	22	3	0	12	4	15	3	11	12	7	2	10
hsa-miR-875-3p	0	0	0	0	4	0	0	0	0	0	0	0	0	0
hsa-miR-877	0	0	0	1	0	0	0	0	0	0	0	0	0	1
hsa-miR-885-3p	0	2	0	1	0	2	1	0	1	1	4	0	1	6
hsa-miR-886-3p	0	0	0	1	1	0	0	2	0	0	0	0	0	0
hsa-miR-886-5p	2	0	0	6	1	0	1	2	0	6	2	2	3	0
hsa-miR-887	1	0	0	0	0	0	0	0	0	0	0	0	0	0
hsa-miR-888*	0	0	0	0	0	0	0	0	0	1	0	0	0	0
hsa-miR-889	0	0	0	0	1	0	0	0	0	0	0	0	0	0
hsa-miR-891b	0	0	0	0	0	0	3	0	0	0	0	0	0	0
hsa-miR-9*	0	0	0	0	0	0	9	1	0	0	1	0	2	3
hsa-miR-921	0	0	0	2	0	0	7	1	0	0	0	0	0	0
hsa-miR-92a	1	8	2	2	2	2	1	3	1	0	1	2	7	4
hsa-miR-92b	4	4	4	4	8	6	2	3	0	1	4	8	11	14
hsa-miR-92b*	2	1	1	0	0	2	4	6	1	1	3	1	4	2
hsa-miR-93	2	3	0	2	2	0	0	0	0	1	0	0	0	4
hsa-miR-93*	1	8	0	2	1	6	1	5	1	2	3	4	8	4
hsa-miR-934	4	0	0	0	3	6	4	0	4	0	2	4	3	7
hsa-miR-935	0	0	1	5	1	0	0	0	0	0	0	0	1	0
hsa-miR-936	0	0	3	0	0	0	0	0	0	0	0	0	0	2
hsa-miR-937	1	1	0	0	0	1	0	5	7	9	1	0	1	2
hsa-miR-939	0	1	0	0	0	0	0	0	0	0	0	0	0	0
hsa-miR-940	5	2	3	7	0	2	0	1	1	3	8	4	2	2
hsa-miR-941	0	0	0	0	0	0	0	0	0	3	0	0	0	0
hsa-miR-943	0	0	3	0	0	0	0	0	0	0	0	0	0	0
hsa-miR-95	0	0	0	4	6	0	0	0	0	0	0	0	0	0
hsa-miR-96	2	5	8	0	1	10	6	6	14	6	7	9	6	3
hsa-miR-96*	0	0	0	0	0	0	2	0	0	0	0	0	1	1
hsa-miR-99a	1	1	2	0	0	8	2	1	3	3	4	5	2	4
hsa-miR-99a*	0	0	1	0	0	0	0	0	0	1	1	0	0	0
hsa-miR-99b	2	8	6	0	0	16	1	2	7	7	4	6	3	4
hsa-miR-99b*	0	0	0	0	0	0	0	0	0	3	0	2	0	0

## Sheet: UFF
	lung cancer	multiple sclerosis	other pancreatic tumors and diseases	pancreatitis	pancreatic cancer ductal	tumor of stomach	sarcoidosis	melanoma	wilms tumor	prostate cancer	acure myocard infarction	periodontitis	ovarian cancer	copd
hsa-miR-106b	100	100	100	100	100	100	100	100	100	100	100	100	100	100
hsa-miR-15b	100	100	100	100	100	100	100	100	100	100	100	100	100	100
hsa-miR-720	100	100	100	100	100	100	100	100	100	100	100	100	100	100
hsa-miR-1280	100	100	100	100	100	100	100	100	100	100	100	100	100	100
hsa-miR-103	100	100	100	100	100	99	100	100	100	100	100	100	100	100
hsa-miR-320a	100	100	100	100	100	100	100	100	100	100	100	100	100	99
hsa-miR-30b	100	100	100	100	100	99	80	100	100	100	100	100	100	100
hsa-miR-106a	69	100	100	100	100	100	100	100	100	100	100	100	100	100
hsa-miR-17	1	37	17	93	97	31	23	51	82	93	100	34	94	92
hsa-miR-19b	100	12	100	88	72	2	0	95	13	16	51	0	3	84
hsa-miR-425	0	51	0	1	0	82	0	53	76	0	28	65	69	0
hsa-miR-185	0	0	0	0	0	11	99	0	27	0	0	100	8	0
hsa-miR-92a	89	0	0	2	0	0	0	0	0	0	0	0	1	22
hsa-miR-20a	0	1	5	16	31	2	0	1	0	3	21	1	25	3
hsa-miR-451	0	99	0	0	0	0	0	0	0	0	0	0	0	0
hsa-miR-30d	0	0	0	0	0	0	98	0	0	0	0	0	0	0
hsa-miR-532-3p	0	0	0	0	0	0	0	0	0	88	0	0	0	0
hsa-miR-574-5p	0	0	78	0	0	0	0	0	0	0	0	0	0	0
hsa-miR-16	0	0	0	0	0	74	0	0	0	0	0	0	0	0
hsa-miR-25	41	0	0	0	0	0	0	0	0	0	0	0	0	0
hsa-miR-423-5p	0	0	0	0	0	0	0	0	2	0	0	0	0	0
